# Supplementary material for: A Genome-Wide Association Study Reveals the Genetic Mechanisms of Nutrient Accumulation in Spinach
Source: MDPI journal article supplement (doi:10.3390/genes15020172), 2024-01-28
Supplement: s1 [file s1]

**a**

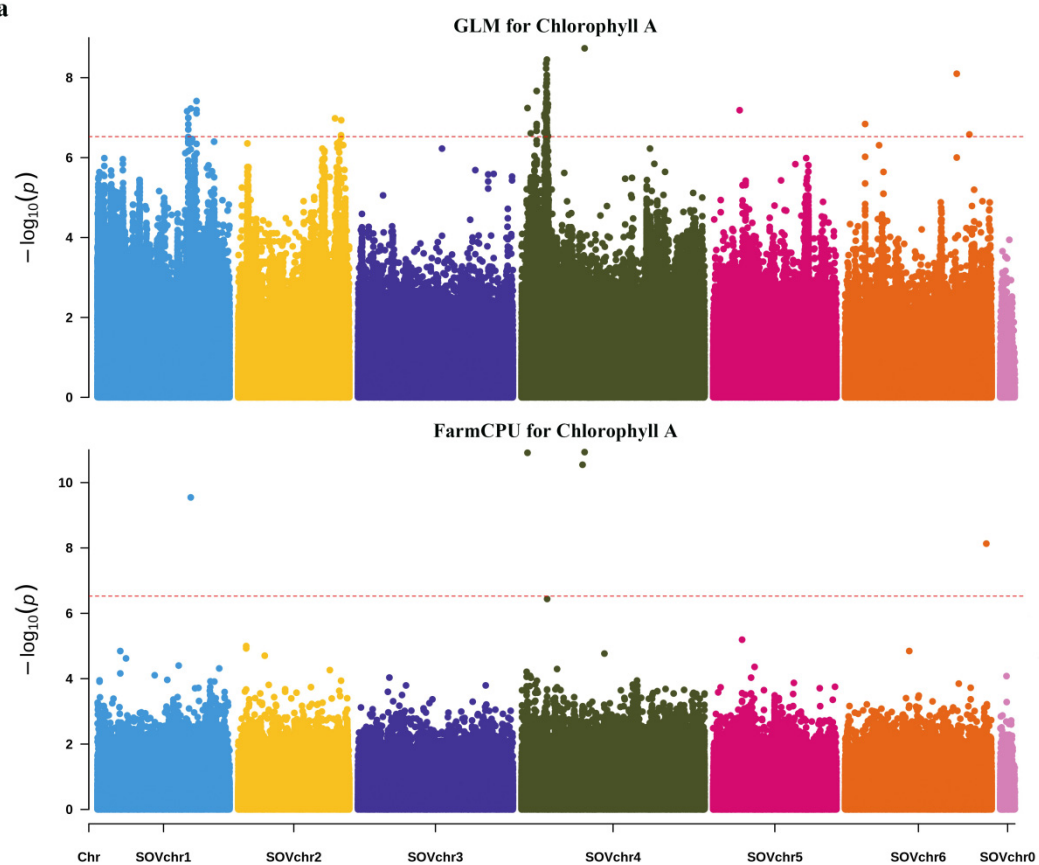

**b**

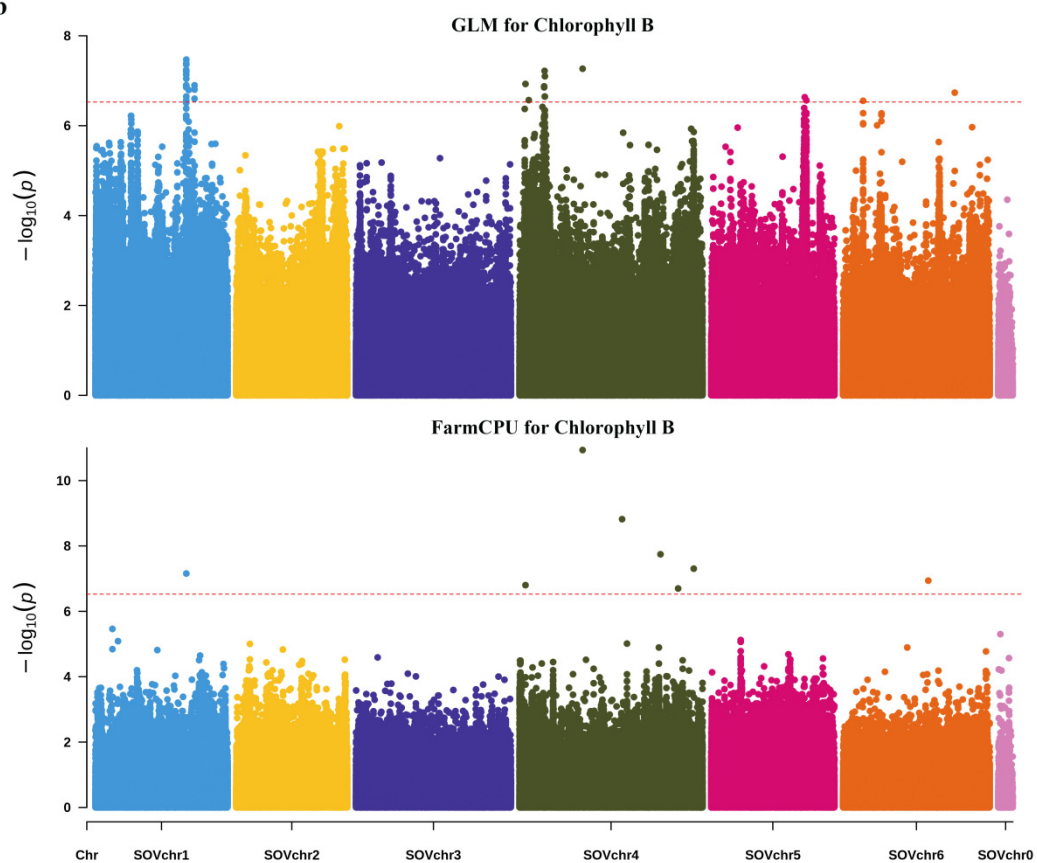

c

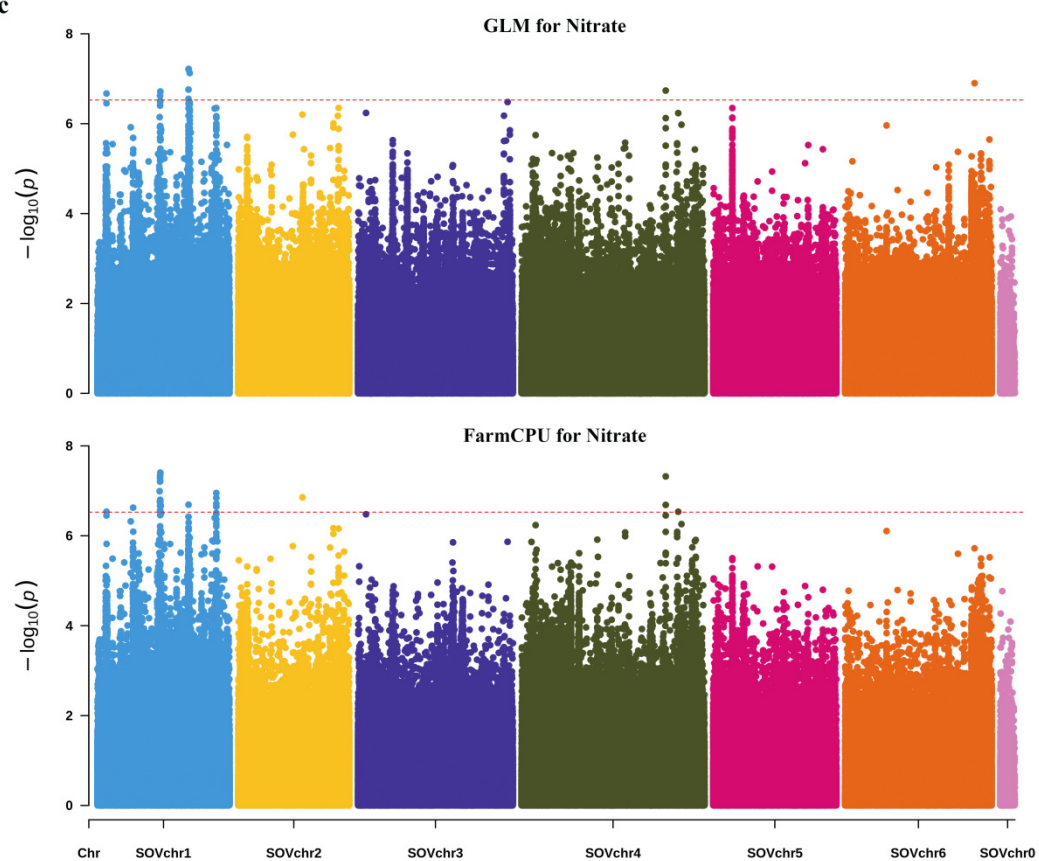

**d**

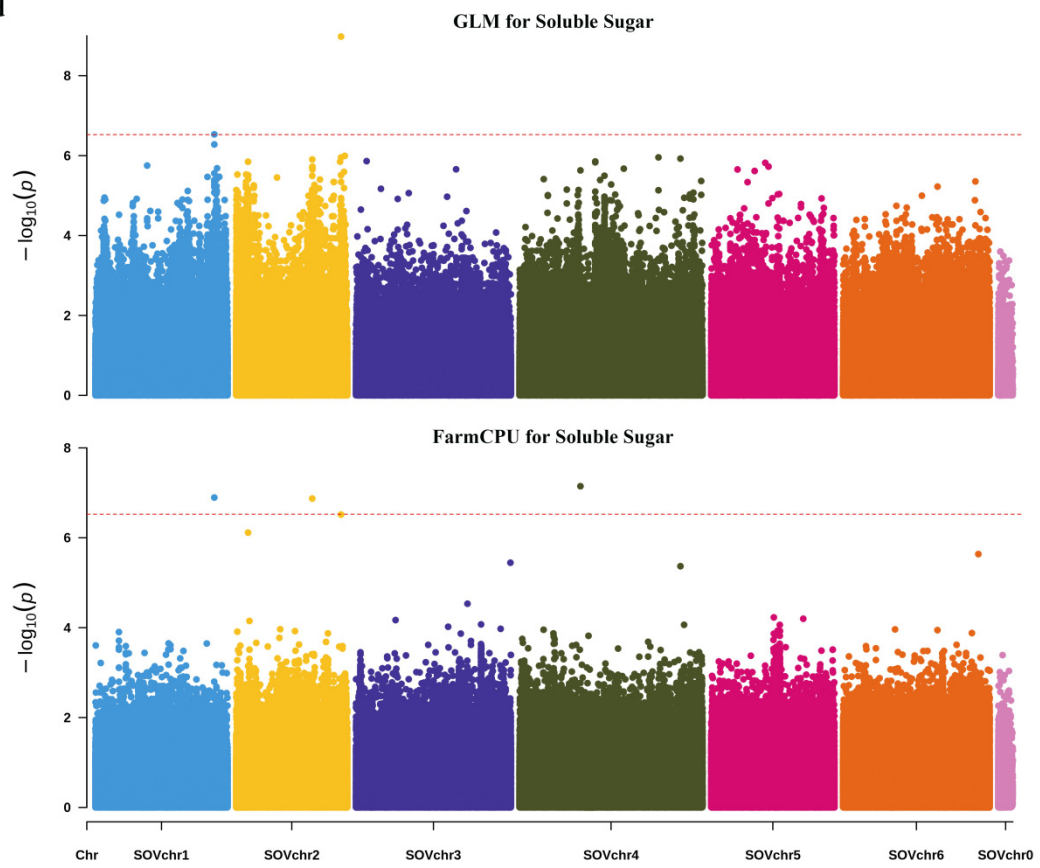

e

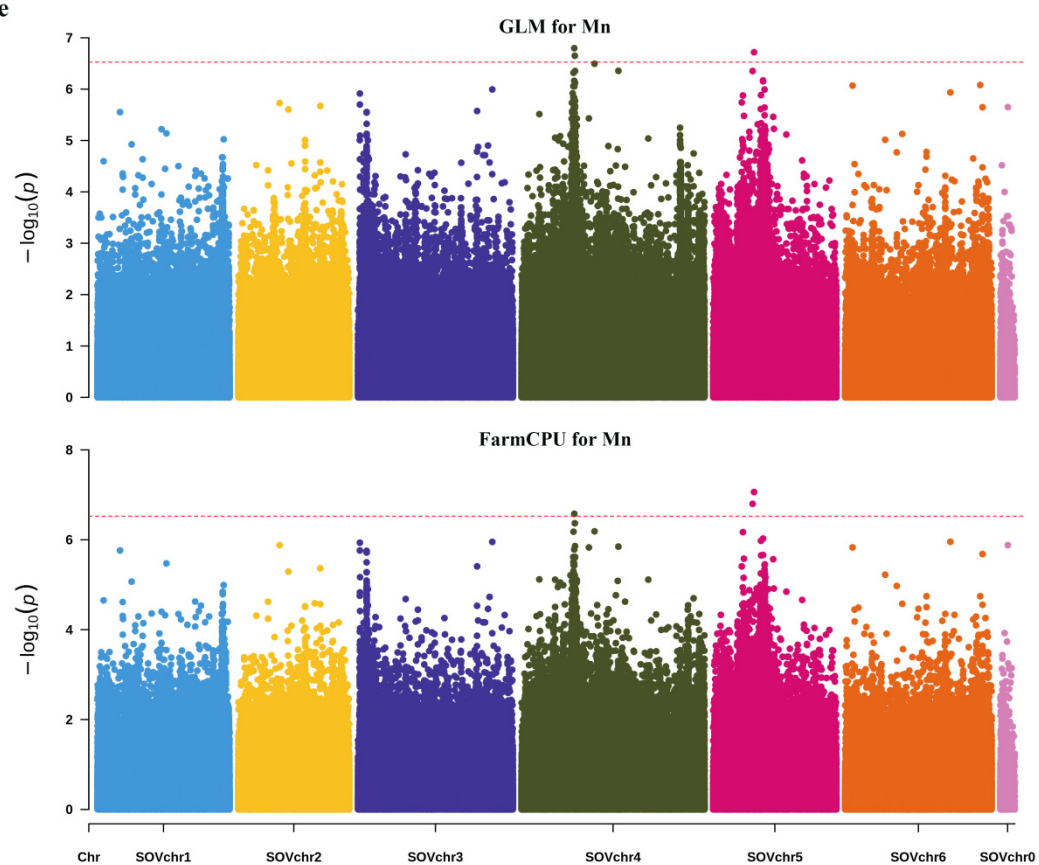

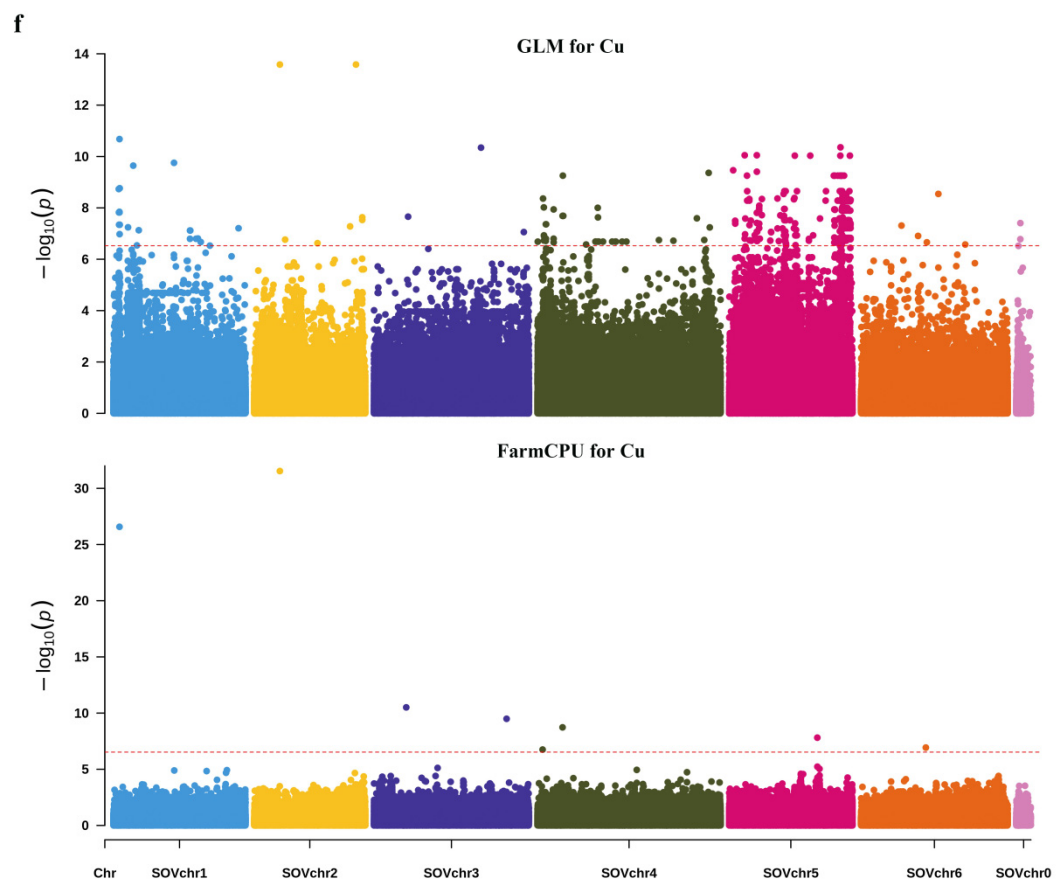

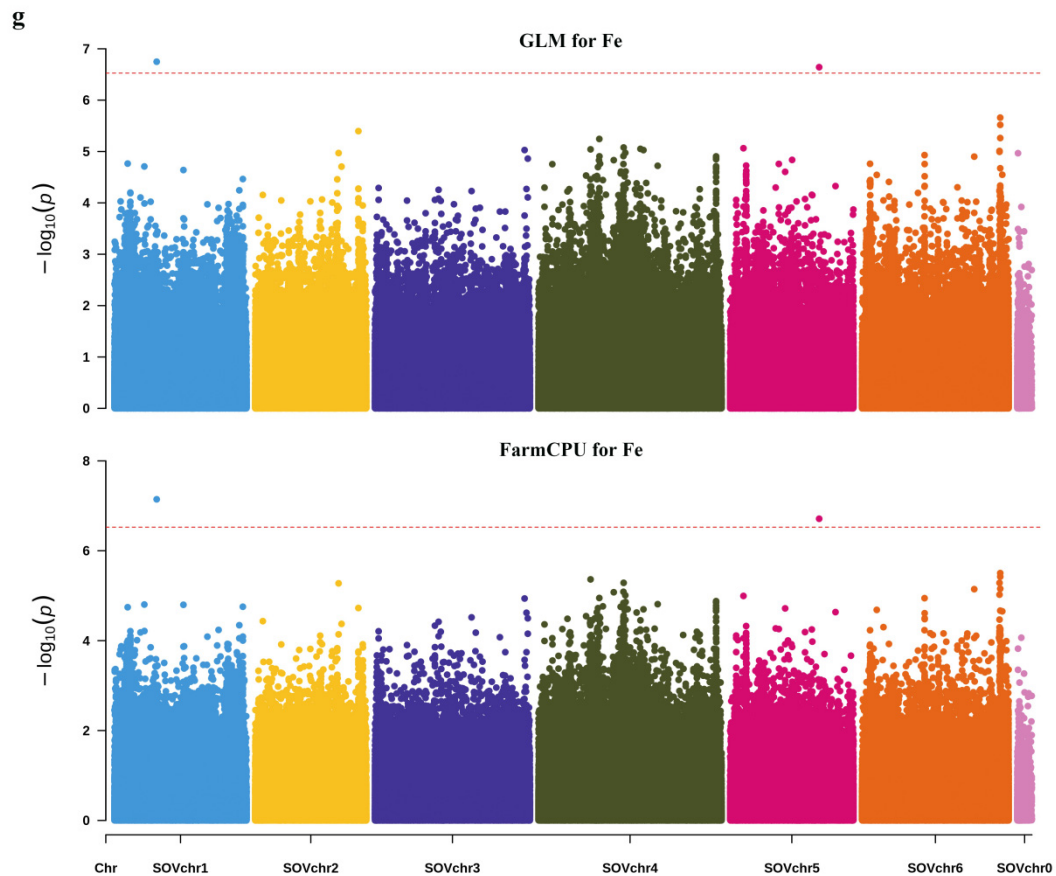

Figure S2: Manhattan plot for genome-wide association analysis (GWAS) of nutrients (a: chlorophyll a; b: chlorophyll b; c: nitrate; d: soluble sugar; e: Mn; f: Cu; and g: Fe) content in spinach using GLM and FarmCPU models. The horizontal and vertical axes represent the genomic position of the SNP and the association power for each SNP, respectively, with the trait expressed as  $-\log_{10}(P)$ . The dashed line shows the Bonferroni-corrected genome-wide threshold.
