# Supplementary material for: A Genome-Wide Association Study Reveals the Genetic Mechanisms of Nutrient Accumulation in Spinach
Source: Genes (Basel). 2024 Jan 28;15(2):172. doi: 10.3390/genes15020172 (PMC10887921; doi:10.3390/genes15020172)
Supplement: Supplementary file 1 [file genes-15-00172-s001.zip]

Archive with 8 entries (8 files):
- Figure S1.jpg
- Figure S2.pdf
- Figure S3.jpg
- Table S1.xlsx
- Table S2.xlsx
- Table S3.xlsx
- Table S4.xlsx
- Table S5.xlsx
