# Supplementary material for: A Genome-Wide Association Study Reveals the Genetic Mechanisms of Nutrient Accumulation in Spinach
Source: Genes (Basel). 2024 Jan 28;15(2):172. doi: 10.3390/genes15020172 (PMC10887921; doi:10.3390/genes15020172)
Supplement: Supplementary file 1 [file genes-15-00172-s001.zip › Table S1.xlsx]

## Sheet: Sheet1
Table S1. Comparative analysis of nutritional quality of different spinach accession
Accession	Chlorophyll A (mg/g)	Chlorophyll B (mg/g)	Oxalate (g/kg)	Nitrate (g/kg)	Crude Fiber (%)	Soluble Sugar (%)	Mn (mg/kg)	Cu (mg/kg)	Fe (mg/kg)
12sl	0.908	0.354	3.66	0.4	0.87	1.18	6.57	1.24	120
15s5	0.571	0.213	4.84	0.4	0.75	1.46	6.06	1.29	118
sp01	0.579	0.184	8.89	2.09	0.84	0.75	6.18	1.21	132
sp18	0.523	0.189	4.43	1.86	0.75	0.71	6.47	1.16	110
sp20	0.48	0.19	4.15	2.09	0.78	0.32	5.6	1.08	126
sp28	0.562	0.179	2.83	1.26	0.75	0.28	8.06	1.22	145
sp35	0.577	0.232	3	1.23	0.65	0.32	5.72	1.01	106
sp36	0.531	0.206	3.7	1.53	0.75	0.32	7.89	1.03	174
sp42	0.542	0.21	3.33	1.72	0.72	0.39	4.86	0.98	92
sp45	0.513	0.219	3.88	1.83	0.8	0.39	6.45	1.13	148
sp46	0.537	0.256	3.47	1.42	0.7	0.21	5.77	0.93	136
sp48	0.735	0.298	4.81	1.76	0.68	0.21	10.7	1.39	152
sp49	0.701	0.273	5.05	0.98	0.7	0.32	10.1	1.33	185
sp50	0.823	0.298	4.45	0.54	0.73	0.39	6.82	1.18	174
sp51	0.926	0.336	3.42	0.31	0.7	0.32	5.52	1.13	117
sp52	0.725	0.295	4.61	1.64	0.64	0.32	6.02	1.02	132
sp53	0.546	0.211	2.38	1.64	0.67	0.25	6.1	1.12	131
sp54	0.728	0.311	5.52	1.34	0.71	0.23	7.46	1.12	165
sp55	0.679	0.256	3.86	1.25	0.76	0.25	6.21	1.07	116
sp56	0.619	0.247	1.86	0.78	0.63	0.21	7.26	0.98	169
sp57	0.9	0.372	4.83	1.01	0.76	0.53	7.73	1.26	126
sp58	0.83	0.343	5	1.97	0.71	0.28	5.47	1.02	85
sp59	0.717	0.291	4.72	1.4	0.7	0.25	6.97	1.15	135
sp61	0.716	0.275	4.22	1.33	0.68	0.25	6.51	1.03	120
sp62	0.758	0.283	3	0.72	0.67	0.21	4.91	1.08	93
sp64	0.563	0.209	4.66	2.24	0.74	0.18	7.52	1.22	163
sp65	0.485	0.179	4.2	1.83	0.72	0.14	5.39	0.96	128
sp68	0.48	0.17	4.08	1.58	0.76	0.46	7.02	1.12	178
sp69	0.509	0.225	3.74	1.05	0.76	0.53	7.25	1.05	164
sp70	0.912	0.363	4.5	1.01	0.82	0.28	7.94	1.25	208
sp71	0.877	0.33	4.61	1.06	0.77	0.28	5.64	1.09	132
sp72	1.073	0.456	7.54	1.71	0.86	0.25	10.3	1.43	265
sp73	0.878	0.356	7.35	1.35	0.66	0.36	6.05	1.2	157
sp74	0.835	0.335	3.46	1.19	0.75	0.64	7.58	1.5	156
sp76	0.604	0.229	4.87	0.98	0.7	0.66	5.62	1.09	136
sp80	0.693	0.264	4.14	0.76	0.74	0.64	10.3	1.17	183
sp84	0.545	0.201	5.3	1.2	0.65	0.14	6.77	1.14	176
sp90	0.681	0.353	5.66	1.76	0.68	0.36	5.1	0.91	106
sp94	0.722	0.35	5.48	0.64	0.69	1.03	5.57	1.15	124
sp95	0.608	0.28	3.02	0.91	0.61	0.82	5.22	1.08	96
sp96	0.633	0.303	5.17	0.55	0.76	1.43	5.8	1.12	139
sp101	0.702	0.319	3.04	0.55	0.84	0.93	5.73	1.07	88
sp102	1.039	0.457	5.45	0.47	0.8	1.21	4	1.13	117
sp103	0.733	0.34	3.33	0.99	0.85	1.03	6.6	1.06	85
sp104	0.915	0.399	4.96	0.34	0.8	1.07	7.72	1.22	99
sp105	0.669	0.292	3.93	0.79	0.76	0.82	5.19	1.04	114
sp106	0.958	0.444	5.49	0.27	0.76	1.64	6.8	1.46	126
sp107	0.993	0.422	6.42	0.36	0.77	1.39	6.39	1.56	120
sp108	0.997	0.466	6.28	0.36	0.74	1.53	6.35	1.54	132
sp109	0.865	0.35	4.23	0.35	0.59	0.68	6.65	1.32	167
sp112	0.822	0.375	5.36	0.37	0.74	1.21	5.26	1.43	119
sp114	0.823	0.344	4.1	0.41	0.69	1.03	5.43	1.25	127
sp115	0.875	0.383	4.57	0.34	0.64	1.21	6.23	1.27	127
sp116	1.009	0.395	4.19	0.26	0.7	1.07	7.02	1.36	123
sp117	0.949	0.419	7.32	0.45	0.68	1.07	6.39	1.19	133
sp119	1.067	0.445	6.09	0.41	0.78	1.32	8.03	1.94	156
sp120	0.981	0.405	6.97	0.38	0.8	1.11	8	3.3	127
sp121	0.74	0.318	3.85	0.54	0.6	0.46	4.42	1.21	77
sp122	0.867	0.351	3.1	0.33	0.69	0.53	6.87	1.4	156
sp123	0.802	0.317	7.57	0.61	0.77	1	6.3	1.33	134
sp124	1.187	0.466	4.76	0.35	0.71	0.82	6.27	1.85	148
sp125	0.609	0.24	3.08	0.48	0.66	0.46	4.57	1.04	112
Average Value	0.749	0.308	4.614	0.996	0.728	0.647	6.56	1.235	135.542
Standard Deviation	0.176	0.082	1.36	0.575	0.063	0.42	1.369	0.329	32.201
Coefficient of Variation (%)	23.541	26.739	29.509	57.716	8.714	64.849	20.864	26.626	23.757
