# Supplementary material for: A Genome-Wide Association Study Reveals the Genetic Mechanisms of Nutrient Accumulation in Spinach
Source: Genes (Basel). 2024 Jan 28;15(2):172. doi: 10.3390/genes15020172 (PMC10887921; doi:10.3390/genes15020172)
Supplement: Supplementary file 1 [file genes-15-00172-s001.zip › Table S2.xlsx]

## Sheet: Sheet1
Table S2. SNP distribution on chromosomes
Chromosome	Length of Chromosome(bp)	SNP number	SNP density(No./kb)
SOVchr1	136525	541250	3.96448
SOVchr2	114789	439501	3.82879
SOVchr3	160044	543231	3.39426
SOVchr4	189052	734008	3.88257
SOVchr5	127368	491869	3.8618
SOVchr6	151450	597674	3.94634
