# Supplementary material for: A Genome-Wide Association Study Reveals the Genetic Mechanisms of Nutrient Accumulation in Spinach
Source: Genes (Basel). 2024 Jan 28;15(2):172. doi: 10.3390/genes15020172 (PMC10887921; doi:10.3390/genes15020172)
Supplement: Supplementary file 1 [file genes-15-00172-s001.zip › Table S3.xlsx]

## Sheet: Sheet1
Table S3. Information on nutrient elements SNPs detected using the GLM model
Trait	SNP	Chr.	Position	Alleles		-LOG10(P)	R-square(%)
Chlorophyll A	SOVchr4-65150089	4	65150089	C	A	8.73634	0.234736
	SOVchr4-26177501	4	26177501	G	A	8.45424	0.20996
	SOVchr4-25382515	4	25382515	T	A	8.35441	0.221618
	SOVchr4-25390032	4	25390032	C	T	8.23152	0.198097
	SOVchr6-115298902	6	115298902	G	A	8.10025	0.320118
	SOVchr4-26019907	4	26019907	G	A	8.06612	0.191434
	SOVchr4-26126899	4	26126899	T	C	8.06612	0.191434
	SOVchr4-26185614	4	26185614	G	A	8.06612	0.191434
	SOVchr4-26185623	4	26185623	T	A	8.06612	0.191434
	SOVchr4-26020926	4	26020926	G	A	7.9591	0.178915
	SOVchr4-25854422	4	25854422	G	T	7.87609	0.179733
	SOVchr4-25799649	4	25799649	G	T	7.8697	0.174554
	SOVchr4-25835104	4	25835104	T	G	7.8697	0.174554
	SOVchr4-25852979	4	25852979	G	T	7.8697	0.174554
	SOVchr4-25904779	4	25904779	C	T	7.8697	0.174554
	SOVchr4-26076558	4	26076558	C	T	7.8697	0.174554
	SOVchr4-26092832	4	26092832	C	T	7.8697	0.174554
	SOVchr4-26286417	4	26286417	G	A	7.8697	0.174554
	SOVchr4-25818025	4	25818025	G	A	7.86671	0.168604
	SOVchr4-26124477	4	26124477	C	A	7.86671	0.168604
	SOVchr4-25233856	4	25233856	C	A	7.78935	0.17608
	SOVchr4-25433933	4	25433933	G	A	7.78075	0.184242
	SOVchr4-15570378	4	15570378	A	G	7.66791	0.178849
	SOVchr4-15572530	4	15572530	C	T	7.66791	0.178849
	SOVchr4-15576042	4	15576042	C	A	7.66791	0.178849
	SOVchr4-15577273	4	15577273	A	T	7.66791	0.178849
	SOVchr4-15651353	4	15651353	A	G	7.66791	0.178849
	SOVchr4-15689948	4	15689948	T	A	7.66791	0.178849
	SOVchr4-15701100	4	15701100	C	G	7.66791	0.178849
	SOVchr4-15702517	4	15702517	G	A	7.66791	0.178849
	SOVchr4-25836530	4	25836530	G	A	7.64031	0.193841
	SOVchr4-25959297	4	25959297	C	T	7.58742	0.17449
	SOVchr4-25995025	4	25995025	G	A	7.58742	0.17449
	SOVchr4-26321438	4	26321438	C	T	7.58742	0.17449
	SOVchr4-25835873	4	25835873	C	T	7.48862	0.182905
	SOVchr4-25853289	4	25853289	G	T	7.48862	0.182905
	SOVchr4-26075460	4	26075460	C	A	7.48101	0.165358
	SOVchr1-102349573	1	102349573	A	C	7.4159	0.193793
	SOVchr1-102350070	1	102350070	A	T	7.4159	0.193793
	SOVchr1-102350309	1	102350309	A	C	7.4159	0.193793
	SOVchr1-102350494	1	102350494	G	A	7.4159	0.193793
	SOVchr1-102351657	1	102351657	C	A	7.4159	0.193793
	SOVchr1-102351741	1	102351741	A	C	7.4159	0.193793
	SOVchr1-102351750	1	102351750	A	G	7.4159	0.193793
	SOVchr1-102353441	1	102353441	T	C	7.4159	0.193793
	SOVchr1-102353459	1	102353459	A	C	7.4159	0.193793
	SOVchr1-102353468	1	102353468	A	G	7.4159	0.193793
	SOVchr4-25286106	4	25286106	C	T	7.38785	0.188858
	SOVchr4-25134034	4	25134034	G	T	7.35142	0.1804
	SOVchr4-25149478	4	25149478	C	T	7.35142	0.1804
	SOVchr4-25168363	4	25168363	A	T	7.35142	0.1804
	SOVchr4-25176517	4	25176517	A	T	7.35142	0.1804
	SOVchr4-25180505	4	25180505	C	A	7.35142	0.1804
	SOVchr4-25181671	4	25181671	A	G	7.35142	0.1804
	SOVchr4-25191538	4	25191538	G	A	7.35142	0.1804
	SOVchr4-25193540	4	25193540	T	A	7.35142	0.1804
	SOVchr4-25212504	4	25212504	C	T	7.35142	0.1804
	SOVchr4-25212938	4	25212938	C	T	7.35142	0.1804
	SOVchr4-25214002	4	25214002	G	C	7.35142	0.1804
	SOVchr4-25220552	4	25220552	C	A	7.35142	0.1804
	SOVchr4-25230854	4	25230854	G	T	7.35142	0.1804
	SOVchr4-25231959	4	25231959	C	A	7.35142	0.1804
	SOVchr4-25241875	4	25241875	A	T	7.35142	0.1804
	SOVchr4-25244562	4	25244562	C	A	7.35142	0.1804
	SOVchr4-25246250	4	25246250	C	A	7.35142	0.1804
	SOVchr4-25254920	4	25254920	G	A	7.35142	0.1804
	SOVchr4-25270702	4	25270702	T	A	7.35142	0.1804
	SOVchr4-25271776	4	25271776	G	A	7.35142	0.1804
	SOVchr4-25279446	4	25279446	C	T	7.35142	0.1804
	SOVchr4-25285800	4	25285800	C	A	7.35142	0.1804
	SOVchr4-25286763	4	25286763	A	T	7.35142	0.1804
	SOVchr4-25317319	4	25317319	G	C	7.35142	0.1804
	SOVchr4-25321180	4	25321180	C	G	7.35142	0.1804
	SOVchr4-25324735	4	25324735	G	A	7.35142	0.1804
	SOVchr4-25335857	4	25335857	A	T	7.35142	0.1804
	SOVchr4-25358428	4	25358428	C	T	7.35142	0.1804
	SOVchr4-25363079	4	25363079	G	A	7.35142	0.1804
	SOVchr4-25365925	4	25365925	C	A	7.35142	0.1804
	SOVchr4-25368979	4	25368979	C	T	7.35142	0.1804
	SOVchr4-25373060	4	25373060	C	T	7.35142	0.1804
	SOVchr4-25373173	4	25373173	G	A	7.35142	0.1804
	SOVchr4-25378371	4	25378371	G	T	7.35142	0.1804
	SOVchr4-25394513	4	25394513	C	T	7.35142	0.1804
	SOVchr4-25396289	4	25396289	G	T	7.35142	0.1804
	SOVchr4-25404330	4	25404330	G	A	7.35142	0.1804
	SOVchr4-25405834	4	25405834	A	T	7.35142	0.1804
	SOVchr4-25417976	4	25417976	C	A	7.35142	0.1804
	SOVchr4-25436303	4	25436303	G	A	7.35142	0.1804
	SOVchr4-25438707	4	25438707	A	G	7.35142	0.1804
	SOVchr4-25444448	4	25444448	C	T	7.35142	0.1804
	SOVchr4-25470485	4	25470485	C	T	7.35142	0.1804
	SOVchr4-25471190	4	25471190	A	G	7.35142	0.1804
	SOVchr4-25471197	4	25471197	G	A	7.35142	0.1804
	SOVchr4-25473170	4	25473170	G	T	7.35142	0.1804
	SOVchr4-25473718	4	25473718	G	T	7.35142	0.1804
	SOVchr4-25482263	4	25482263	C	A	7.35142	0.1804
	SOVchr4-25616524	4	25616524	G	A	7.35142	0.1804
	SOVchr4-25730145	4	25730145	T	C	7.34116	0.17695
	SOVchr4-25730743	4	25730743	G	A	7.34116	0.17695
	SOVchr4-25731936	4	25731936	T	C	7.34116	0.17695
	SOVchr4-25780420	4	25780420	T	A	7.34116	0.17695
	SOVchr4-25791730	4	25791730	G	A	7.34116	0.17695
	SOVchr4-25794654	4	25794654	T	C	7.34116	0.17695
	SOVchr4-25795633	4	25795633	T	C	7.34116	0.17695
	SOVchr4-25796059	4	25796059	C	T	7.34116	0.17695
	SOVchr4-25796836	4	25796836	A	G	7.34116	0.17695
	SOVchr4-25797962	4	25797962	G	C	7.34116	0.17695
	SOVchr4-25799139	4	25799139	C	G	7.34116	0.17695
	SOVchr4-25801072	4	25801072	G	A	7.34116	0.17695
	SOVchr4-25805606	4	25805606	G	A	7.34116	0.17695
	SOVchr4-25810888	4	25810888	G	C	7.34116	0.17695
	SOVchr4-25815629	4	25815629	C	A	7.34116	0.17695
	SOVchr4-25816051	4	25816051	A	T	7.34116	0.17695
	SOVchr4-25817540	4	25817540	C	A	7.34116	0.17695
	SOVchr4-25818194	4	25818194	T	C	7.34116	0.17695
	SOVchr4-25820429	4	25820429	C	T	7.34116	0.17695
	SOVchr4-25821745	4	25821745	C	T	7.34116	0.17695
	SOVchr4-25835693	4	25835693	G	T	7.34116	0.17695
	SOVchr4-25839577	4	25839577	G	A	7.34116	0.17695
	SOVchr4-25841622	4	25841622	G	T	7.34116	0.17695
	SOVchr4-25843030	4	25843030	G	A	7.34116	0.17695
	SOVchr4-25846663	4	25846663	C	T	7.34116	0.17695
	SOVchr4-25850494	4	25850494	G	C	7.34116	0.17695
	SOVchr4-25850534	4	25850534	A	T	7.34116	0.17695
	SOVchr4-25850994	4	25850994	A	G	7.34116	0.17695
	SOVchr4-25852091	4	25852091	G	T	7.34116	0.17695
	SOVchr4-25853322	4	25853322	C	T	7.34116	0.17695
	SOVchr4-25868415	4	25868415	G	A	7.34116	0.17695
	SOVchr4-25870779	4	25870779	T	C	7.34116	0.17695
	SOVchr4-25872394	4	25872394	T	C	7.34116	0.17695
	SOVchr4-25872893	4	25872893	C	T	7.34116	0.17695
	SOVchr4-25876810	4	25876810	G	A	7.34116	0.17695
	SOVchr4-25879098	4	25879098	G	A	7.34116	0.17695
	SOVchr4-25879108	4	25879108	G	C	7.34116	0.17695
	SOVchr4-25879240	4	25879240	C	A	7.34116	0.17695
	SOVchr4-25879465	4	25879465	G	T	7.34116	0.17695
	SOVchr4-25882298	4	25882298	T	C	7.34116	0.17695
	SOVchr4-25884505	4	25884505	C	T	7.34116	0.17695
	SOVchr4-25891652	4	25891652	G	T	7.34116	0.17695
	SOVchr4-25892085	4	25892085	G	A	7.34116	0.17695
	SOVchr4-25892176	4	25892176	C	T	7.34116	0.17695
	SOVchr4-25892265	4	25892265	A	T	7.34116	0.17695
	SOVchr4-25906777	4	25906777	T	A	7.34116	0.17695
	SOVchr4-25908414	4	25908414	A	G	7.34116	0.17695
	SOVchr4-25913938	4	25913938	C	A	7.34116	0.17695
	SOVchr4-25916639	4	25916639	C	T	7.34116	0.17695
	SOVchr4-25917830	4	25917830	T	C	7.34116	0.17695
	SOVchr4-25920174	4	25920174	G	T	7.34116	0.17695
	SOVchr4-25921672	4	25921672	A	T	7.34116	0.17695
	SOVchr4-25922401	4	25922401	C	T	7.34116	0.17695
	SOVchr4-25941398	4	25941398	G	A	7.34116	0.17695
	SOVchr4-25944836	4	25944836	G	A	7.34116	0.17695
	SOVchr4-25961235	4	25961235	G	T	7.34116	0.17695
	SOVchr4-25961494	4	25961494	C	T	7.34116	0.17695
	SOVchr4-25963219	4	25963219	A	G	7.34116	0.17695
	SOVchr4-25969690	4	25969690	A	T	7.34116	0.17695
	SOVchr4-25969955	4	25969955	C	A	7.34116	0.17695
	SOVchr4-25971117	4	25971117	G	A	7.34116	0.17695
	SOVchr4-25973650	4	25973650	G	A	7.34116	0.17695
	SOVchr4-25974960	4	25974960	G	A	7.34116	0.17695
	SOVchr4-25976147	4	25976147	C	T	7.34116	0.17695
	SOVchr4-25977281	4	25977281	T	C	7.34116	0.17695
	SOVchr4-25977326	4	25977326	G	A	7.34116	0.17695
	SOVchr4-25981008	4	25981008	G	A	7.34116	0.17695
	SOVchr4-25988105	4	25988105	C	T	7.34116	0.17695
	SOVchr4-25992441	4	25992441	G	A	7.34116	0.17695
	SOVchr4-25992992	4	25992992	A	G	7.34116	0.17695
	SOVchr4-25994981	4	25994981	T	C	7.34116	0.17695
	SOVchr4-25995614	4	25995614	T	A	7.34116	0.17695
	SOVchr4-25995785	4	25995785	C	A	7.34116	0.17695
	SOVchr4-25996229	4	25996229	T	C	7.34116	0.17695
	SOVchr4-25996592	4	25996592	A	T	7.34116	0.17695
	SOVchr4-25999989	4	25999989	C	T	7.34116	0.17695
	SOVchr4-26002225	4	26002225	G	A	7.34116	0.17695
	SOVchr4-26006132	4	26006132	C	A	7.34116	0.17695
	SOVchr4-26008175	4	26008175	G	A	7.34116	0.17695
	SOVchr4-26012341	4	26012341	G	A	7.34116	0.17695
	SOVchr4-26016102	4	26016102	A	T	7.34116	0.17695
	SOVchr4-26036277	4	26036277	C	T	7.34116	0.17695
	SOVchr4-26061699	4	26061699	G	T	7.34116	0.17695
	SOVchr4-26064775	4	26064775	T	A	7.34116	0.17695
	SOVchr4-26066597	4	26066597	G	A	7.34116	0.17695
	SOVchr4-26070428	4	26070428	C	T	7.34116	0.17695
	SOVchr4-26073305	4	26073305	G	T	7.34116	0.17695
	SOVchr4-26076384	4	26076384	C	A	7.34116	0.17695
	SOVchr4-26076396	4	26076396	G	A	7.34116	0.17695
	SOVchr4-26084629	4	26084629	G	A	7.34116	0.17695
	SOVchr4-26088699	4	26088699	G	C	7.34116	0.17695
	SOVchr4-26097372	4	26097372	G	T	7.34116	0.17695
	SOVchr4-26097733	4	26097733	C	T	7.34116	0.17695
	SOVchr4-26098583	4	26098583	G	A	7.34116	0.17695
	SOVchr4-26102284	4	26102284	G	A	7.34116	0.17695
	SOVchr4-26104728	4	26104728	G	A	7.34116	0.17695
	SOVchr4-26104941	4	26104941	G	T	7.34116	0.17695
	SOVchr4-26125387	4	26125387	G	C	7.34116	0.17695
	SOVchr4-26125388	4	26125388	A	T	7.34116	0.17695
	SOVchr4-26127167	4	26127167	C	T	7.34116	0.17695
	SOVchr4-26128102	4	26128102	A	G	7.34116	0.17695
	SOVchr4-26128331	4	26128331	G	A	7.34116	0.17695
	SOVchr4-26157564	4	26157564	G	T	7.34116	0.17695
	SOVchr4-26160711	4	26160711	T	A	7.34116	0.17695
	SOVchr4-26163785	4	26163785	G	C	7.34116	0.17695
	SOVchr4-26165643	4	26165643	G	A	7.34116	0.17695
	SOVchr4-26165875	4	26165875	A	C	7.34116	0.17695
	SOVchr4-26167751	4	26167751	T	A	7.34116	0.17695
	SOVchr4-26170096	4	26170096	C	T	7.34116	0.17695
	SOVchr4-26170731	4	26170731	T	C	7.34116	0.17695
	SOVchr4-26173129	4	26173129	G	A	7.34116	0.17695
	SOVchr4-26176272	4	26176272	C	G	7.34116	0.17695
	SOVchr4-26178007	4	26178007	A	T	7.34116	0.17695
	SOVchr4-26179311	4	26179311	C	T	7.34116	0.17695
	SOVchr4-26187269	4	26187269	T	A	7.34116	0.17695
	SOVchr4-26209654	4	26209654	T	G	7.34116	0.17695
	SOVchr4-26213233	4	26213233	C	T	7.34116	0.17695
	SOVchr4-26216200	4	26216200	T	G	7.34116	0.17695
	SOVchr4-26217597	4	26217597	T	C	7.34116	0.17695
	SOVchr4-26221826	4	26221826	C	G	7.34116	0.17695
	SOVchr4-26227709	4	26227709	C	A	7.34116	0.17695
	SOVchr4-26236412	4	26236412	G	T	7.34116	0.17695
	SOVchr4-26238685	4	26238685	G	T	7.34116	0.17695
	SOVchr4-26239204	4	26239204	C	T	7.34116	0.17695
	SOVchr4-26239637	4	26239637	A	C	7.34116	0.17695
	SOVchr4-26239685	4	26239685	T	A	7.34116	0.17695
	SOVchr4-26241342	4	26241342	G	T	7.34116	0.17695
	SOVchr4-26243364	4	26243364	T	C	7.34116	0.17695
	SOVchr4-26244673	4	26244673	A	G	7.34116	0.17695
	SOVchr4-26273973	4	26273973	G	A	7.34116	0.17695
	SOVchr4-26285687	4	26285687	G	A	7.34116	0.17695
	SOVchr4-26312664	4	26312664	C	T	7.34116	0.17695
	SOVchr4-26318555	4	26318555	T	C	7.34116	0.17695
	SOVchr4-26326856	4	26326856	A	G	7.34116	0.17695
	SOVchr4-26327236	4	26327236	G	A	7.34116	0.17695
	SOVchr4-26333517	4	26333517	G	A	7.34116	0.17695
	SOVchr4-26336222	4	26336222	C	A	7.34116	0.17695
	SOVchr4-26336270	4	26336270	A	C	7.34116	0.17695
	SOVchr4-27262223	4	27262223	C	T	7.34116	0.17695
	SOVchr4-27376124	4	27376124	G	A	7.34116	0.17695
	SOVchr4-25732431	4	25732431	G	A	7.26191	0.169032
	SOVchr4-25819914	4	25819914	G	A	7.26191	0.169032
	SOVchr4-25836430	4	25836430	G	A	7.26191	0.169032
	SOVchr4-25873453	4	25873453	G	C	7.26191	0.169032
	SOVchr4-25964079	4	25964079	A	C	7.26191	0.169032
	SOVchr4-25976969	4	25976969	A	T	7.26191	0.169032
	SOVchr4-26000690	4	26000690	G	A	7.26191	0.169032
	SOVchr4-26063039	4	26063039	C	T	7.26191	0.169032
	SOVchr4-26122697	4	26122697	G	A	7.26191	0.169032
	SOVchr4-26236955	4	26236955	G	T	7.26191	0.169032
	SOVchr4-26278330	4	26278330	G	A	7.26191	0.169032
	SOVchr4-27079160	4	27079160	T	A	7.26191	0.169032
	SOVchr4-6134363	4	6134363	G	T	7.24094	0.178563
	SOVchr4-25852460	4	25852460	G	A	7.23663	0.184713
	SOVchr1-96376944	1	96376944	C	A	7.22926	0.169269
	SOVchr4-25754397	4	25754397	G	T	7.22766	0.167172
	SOVchr4-25796452	4	25796452	A	G	7.22766	0.167172
	SOVchr4-25796962	4	25796962	T	C	7.22766	0.167172
	SOVchr4-25857235	4	25857235	C	A	7.22766	0.167172
	SOVchr4-25965450	4	25965450	C	T	7.22766	0.167172
	SOVchr4-26093311	4	26093311	T	G	7.22766	0.167172
	SOVchr4-26183197	4	26183197	G	A	7.22766	0.167172
	SOVchr4-26226215	4	26226215	C	T	7.22766	0.167172
	SOVchr1-102352819	1	102352819	C	A	7.19382	0.176245
	SOVchr4-26323618	4	26323618	C	A	7.18667	0.309975
	SOVchr5-27334719	5	27334719	G	C	7.18667	0.309975
	SOVchr4-25290970	4	25290970	G	A	7.18009	0.17041
	SOVchr4-25362488	4	25362488	T	G	7.18009	0.17041
	SOVchr1-92602630	1	92602630	T	C	7.16132	0.349539
	SOVchr4-26219879	4	26219879	G	A	7.14919	0.168467
	SOVchr1-102350150	1	102350150	T	C	7.10885	0.18566
	SOVchr1-102350451	1	102350451	G	A	7.10885	0.18566
	SOVchr1-102350465	1	102350465	A	G	7.10885	0.18566
	SOVchr1-102350580	1	102350580	C	T	7.10885	0.18566
	SOVchr1-102350790	1	102350790	G	A	7.10885	0.18566
	SOVchr1-102350930	1	102350930	A	T	7.10885	0.18566
	SOVchr1-102350967	1	102350967	C	A	7.10885	0.18566
	SOVchr1-102351093	1	102351093	C	T	7.10885	0.18566
	SOVchr1-102351605	1	102351605	G	A	7.10885	0.18566
	SOVchr1-102352311	1	102352311	A	G	7.10885	0.18566
	SOVchr1-102352435	1	102352435	A	T	7.10885	0.18566
	SOVchr1-102353036	1	102353036	C	A	7.10885	0.18566
	SOVchr1-102353236	1	102353236	C	A	7.10885	0.18566
	SOVchr1-102353310	1	102353310	T	C	7.10885	0.18566
	SOVchr1-102353316	1	102353316	C	T	7.10885	0.18566
	SOVchr1-102353389	1	102353389	G	A	7.10885	0.18566
	SOVchr1-102353543	1	102353543	A	T	7.10885	0.18566
	SOVchr1-102353594	1	102353594	G	A	7.10885	0.18566
	SOVchr4-23564477	4	23564477	A	C	7.08743	0.163602
	SOVchr4-25434531	4	25434531	C	T	7.01843	0.20699
	SOVchr4-23686600	4	23686600	A	C	7.01799	0.16684
	SOVchr1-93820586	1	93820586	T	C	6.99964	0.15446
	SOVchr1-93800571	1	93800571	G	T	6.99414	0.155005
	SOVchr2-99992382	2	99992382	C	T	6.98309	0.151622
	SOVchr4-25998766	4	25998766	G	A	6.98282	0.163998
	SOVchr4-25467075	4	25467075	C	G	6.96979	0.16664
	SOVchr4-26226924	4	26226924	T	G	6.94986	0.185395
	SOVchr2-106431396	2	106431396	A	G	6.93682	0.121989
	SOVchr4-25173440	4	25173440	A	C	6.93314	0.173657
	SOVchr4-25393318	4	25393318	T	A	6.92895	0.21353
	SOVchr4-26016791	4	26016791	C	T	6.8769	0.168105
	SOVchr4-26089527	4	26089527	G	A	6.87434	0.16767
	SOVchr4-25842549	4	25842549	G	A	6.87023	0.175229
	SOVchr4-25875948	4	25875948	G	A	6.86841	0.175268
	SOVchr6-20668040	6	20668040	A	C	6.84173	0.236697
	SOVchr6-20668050	6	20668050	C	T	6.84173	0.236697
	SOVchr4-15573130	4	15573130	T	A	6.84082	0.168921
	SOVchr4-15575908	4	15575908	G	A	6.84082	0.168921
	SOVchr4-15576388	4	15576388	A	G	6.84082	0.168921
	SOVchr4-15582873	4	15582873	A	G	6.84082	0.168921
	SOVchr4-15700891	4	15700891	G	T	6.84082	0.168921
	SOVchr1-93842468	1	93842468	A	C	6.83505	0.15623
	SOVchr4-25843466	4	25843466	G	A	6.79721	0.178838
	SOVchr4-15580815	4	15580815	C	T	6.77957	0.156117
	SOVchr4-25825311	4	25825311	C	T	6.7457	0.159949
	SOVchr4-26005863	4	26005863	C	T	6.7457	0.159949
	SOVchr4-25785555	4	25785555	A	G	6.74507	0.175501
	SOVchr1-93820305	1	93820305	A	C	6.70267	0.149945
	SOVchr4-25878994	4	25878994	G	C	6.68235	0.173852
	SOVchr4-26100367	4	26100367	C	T	6.68235	0.173852
	SOVchr4-15573588	4	15573588	A	G	6.66983	0.170047
	SOVchr4-15578982	4	15578982	C	T	6.66983	0.170047
	SOVchr4-25838266	4	25838266	G	A	6.66329	0.183848
	SOVchr4-25276062	4	25276062	C	T	6.64095	0.173613
	SOVchr4-25332343	4	25332343	A	G	6.64095	0.173613
	SOVchr4-25349023	4	25349023	C	A	6.64095	0.173613
	SOVchr4-25572505	4	25572505	G	A	6.64095	0.173613
	SOVchr4-23561642	4	23561642	T	C	6.63398	0.160616
	SOVchr4-23561643	4	23561643	C	G	6.63398	0.160616
	SOVchr4-25853505	4	25853505	C	T	6.63241	0.170154
	SOVchr4-25853591	4	25853591	G	T	6.63241	0.170154
	SOVchr4-25904936	4	25904936	A	T	6.63241	0.170154
	SOVchr4-25915924	4	25915924	G	A	6.63241	0.170154
	SOVchr4-25943825	4	25943825	A	G	6.63241	0.170154
	SOVchr4-25988368	4	25988368	T	A	6.63241	0.170154
	SOVchr4-25999764	4	25999764	G	C	6.63241	0.170154
	SOVchr4-26004595	4	26004595	G	C	6.63241	0.170154
	SOVchr4-26008231	4	26008231	T	C	6.63241	0.170154
	SOVchr4-26082919	4	26082919	C	A	6.63241	0.170154
	SOVchr4-26093036	4	26093036	A	T	6.63241	0.170154
	SOVchr4-26100096	4	26100096	A	T	6.63241	0.170154
	SOVchr4-26164210	4	26164210	C	T	6.63241	0.170154
	SOVchr4-26288343	4	26288343	G	A	6.63241	0.170154
	SOVchr4-26318477	4	26318477	C	T	6.63241	0.170154
	SOVchr4-9489056	4	9489056	T	C	6.60815	0.17863
	SOVchr4-26185479	4	26185479	A	T	6.60631	0.175124
	SOVchr4-25143675	4	25143675	G	A	6.60311	0.171404
	SOVchr4-25147787	4	25147787	G	A	6.60311	0.171404
	SOVchr4-25321048	4	25321048	C	A	6.60311	0.171404
	SOVchr4-25325719	4	25325719	C	A	6.60311	0.171404
	SOVchr4-25356184	4	25356184	C	T	6.60311	0.171404
	SOVchr4-25356304	4	25356304	C	A	6.60311	0.171404
	SOVchr4-25395275	4	25395275	G	A	6.60311	0.171404
	SOVchr4-25447134	4	25447134	G	A	6.60311	0.171404
	SOVchr4-25456593	4	25456593	G	A	6.60311	0.171404
	SOVchr4-25478632	4	25478632	A	G	6.60311	0.171404
	SOVchr4-25561463	4	25561463	C	T	6.60311	0.171404
	SOVchr4-26091663	4	26091663	G	C	6.59407	0.162912
	SOVchr6-128379021	6	128379021	G	A	6.58029	0.312844
	SOVchr2-106205551	2	106205551	C	G	6.56006	0.134637
	SOVchr4-25733477	4	25733477	A	T	6.53852	0.166786
	SOVchr4-25797459	4	25797459	C	G	6.53852	0.166786
	SOVchr4-25797910	4	25797910	A	G	6.53852	0.166786
	SOVchr4-25810535	4	25810535	G	T	6.53852	0.166786
	SOVchr4-25811313	4	25811313	G	A	6.53852	0.166786
	SOVchr4-25847676	4	25847676	G	A	6.53852	0.166786
	SOVchr4-25857414	4	25857414	C	A	6.53852	0.166786
	SOVchr4-25868284	4	25868284	G	T	6.53852	0.166786
	SOVchr4-25869133	4	25869133	G	T	6.53852	0.166786
	SOVchr4-25877812	4	25877812	T	A	6.53852	0.166786
	SOVchr4-25879830	4	25879830	A	G	6.53852	0.166786
	SOVchr4-25909181	4	25909181	G	A	6.53852	0.166786
	SOVchr4-25962097	4	25962097	C	A	6.53852	0.166786
	SOVchr4-25968258	4	25968258	C	A	6.53852	0.166786
	SOVchr4-25980650	4	25980650	C	G	6.53852	0.166786
	SOVchr4-26009714	4	26009714	A	T	6.53852	0.166786
	SOVchr4-26039210	4	26039210	A	T	6.53852	0.166786
	SOVchr4-26039211	4	26039211	C	T	6.53852	0.166786
	SOVchr4-26059567	4	26059567	C	G	6.53852	0.166786
	SOVchr4-26067376	4	26067376	G	T	6.53852	0.166786
	SOVchr4-26078397	4	26078397	C	G	6.53852	0.166786
	SOVchr4-26097524	4	26097524	G	T	6.53852	0.166786
	SOVchr4-26127596	4	26127596	T	C	6.53852	0.166786
	SOVchr4-26171100	4	26171100	T	A	6.53852	0.166786
	SOVchr4-26187619	4	26187619	G	A	6.53852	0.166786
	SOVchr4-26187671	4	26187671	T	A	6.53852	0.166786
	SOVchr4-26217293	4	26217293	T	C	6.53852	0.166786
	SOVchr4-26219220	4	26219220	C	T	6.53852	0.166786
	SOVchr4-26219255	4	26219255	G	A	6.53852	0.166786
	SOVchr4-26233637	4	26233637	G	A	6.53852	0.166786
	SOVchr4-26235617	4	26235617	C	T	6.53852	0.166786
	SOVchr4-26320275	4	26320275	T	G	6.53852	0.166786
	SOVchr4-26331006	4	26331006	C	T	6.53852	0.166786
	SOVchr4-27308096	4	27308096	G	C	6.53852	0.166786
	SOVchr4-27368184	4	27368184	G	T	6.53852	0.166786
	SOVchr4-25294108	4	25294108	G	A	6.5237	0.161925
Chlorophyll B	SOVchr1-93842468	1	93842468	A	C	7.47023	0.0766932
	SOVchr1-93800571	1	93800571	G	T	7.38536	0.0750067
	SOVchr1-93820586	1	93820586	T	C	7.35821	0.0746056
	SOVchr4-65150089	4	65150089	C	A	7.26685	0.103208
	SOVchr1-93769662	1	93769662	G	T	7.24098	0.0745667
	SOVchr1-93813083	1	93813083	C	G	7.24098	0.0745667
	SOVchr1-93829439	1	93829439	A	G	7.24098	0.0745667
	SOVchr1-93837430	1	93837430	G	C	7.24098	0.0745667
	SOVchr1-93838088	1	93838088	A	G	7.24098	0.0745667
	SOVchr1-93838156	1	93838156	T	G	7.24098	0.0745667
	SOVchr1-93842261	1	93842261	G	C	7.24098	0.0745667
	SOVchr4-25854422	4	25854422	G	T	7.21791	0.0820644
	SOVchr1-93820305	1	93820305	A	C	7.20126	0.0731097
	SOVchr1-93776438	1	93776438	G	A	7.13485	0.0736148
	SOVchr4-26177501	4	26177501	G	A	7.09893	0.0925864
	SOVchr1-93843080	1	93843080	A	C	7.04494	0.0750502
	SOVchr4-6134363	4	6134363	G	T	6.92824	0.0829367
	SOVchr1-93800585	1	93800585	G	A	6.90162	0.0741566
	SOVchr1-102352819	1	102352819	C	A	6.898	0.0819309
	SOVchr1-93768563	1	93768563	C	T	6.88875	0.0723674
	SOVchr1-93768579	1	93768579	T	A	6.88875	0.0723674
	SOVchr4-25382515	4	25382515	T	A	6.87478	0.0968679
	SOVchr4-25390032	4	25390032	C	T	6.85232	0.08697
	SOVchr1-93785045	1	93785045	A	C	6.85176	0.073467
	SOVchr1-93787650	1	93787650	T	C	6.85176	0.073467
	SOVchr1-93805704	1	93805704	T	C	6.85176	0.073467
	SOVchr1-93834737	1	93834737	T	C	6.85176	0.073467
	SOVchr1-93838531	1	93838531	G	T	6.85176	0.073467
	SOVchr1-102350150	1	102350150	T	C	6.8034	0.0862303
	SOVchr1-102350451	1	102350451	G	A	6.8034	0.0862303
	SOVchr1-102350465	1	102350465	A	G	6.8034	0.0862303
	SOVchr1-102350580	1	102350580	C	T	6.8034	0.0862303
	SOVchr1-102350790	1	102350790	G	A	6.8034	0.0862303
	SOVchr1-102350930	1	102350930	A	T	6.8034	0.0862303
	SOVchr1-102350967	1	102350967	C	A	6.8034	0.0862303
	SOVchr1-102351093	1	102351093	C	T	6.8034	0.0862303
	SOVchr1-102351605	1	102351605	G	A	6.8034	0.0862303
	SOVchr1-102352311	1	102352311	A	G	6.8034	0.0862303
	SOVchr1-102352435	1	102352435	A	T	6.8034	0.0862303
	SOVchr1-102353036	1	102353036	C	A	6.8034	0.0862303
	SOVchr1-102353236	1	102353236	C	A	6.8034	0.0862303
	SOVchr1-102353310	1	102353310	T	C	6.8034	0.0862303
	SOVchr1-102353316	1	102353316	C	T	6.8034	0.0862303
	SOVchr1-102353389	1	102353389	G	A	6.8034	0.0862303
	SOVchr1-102353543	1	102353543	A	T	6.8034	0.0862303
	SOVchr1-102353594	1	102353594	G	A	6.8034	0.0862303
	SOVchr1-96376944	1	96376944	C	A	6.79351	0.0780229
	SOVchr6-115298902	6	115298902	G	A	6.73498	0.140402
	SOVchr1-93838650	1	93838650	G	C	6.64899	0.0738145
	SOVchr4-26019907	4	26019907	G	A	6.64803	0.0836378
	SOVchr4-26126899	4	26126899	T	C	6.64803	0.0836378
	SOVchr4-26185614	4	26185614	G	A	6.64803	0.0836378
	SOVchr4-26185623	4	26185623	T	A	6.64803	0.0836378
	SOVchr5-96656307	5	96656307	A	G	6.63272	0.0628254
	SOVchr1-102349573	1	102349573	A	C	6.6003	0.0873145
	SOVchr1-102350070	1	102350070	A	T	6.6003	0.0873145
	SOVchr1-102350309	1	102350309	A	C	6.6003	0.0873145
	SOVchr1-102350494	1	102350494	G	A	6.6003	0.0873145
	SOVchr1-102351657	1	102351657	C	A	6.6003	0.0873145
	SOVchr1-102351741	1	102351741	A	C	6.6003	0.0873145
	SOVchr1-102351750	1	102351750	A	G	6.6003	0.0873145
	SOVchr1-102353441	1	102353441	T	C	6.6003	0.0873145
	SOVchr1-102353459	1	102353459	A	C	6.6003	0.0873145
	SOVchr1-102353468	1	102353468	A	G	6.6003	0.0873145
	SOVchr4-9489056	4	9489056	T	C	6.5688	0.0842935
	SOVchr1-93768970	1	93768970	C	A	6.56647	0.0732449
	SOVchr1-93769073	1	93769073	G	A	6.56647	0.0732449
	SOVchr1-93769180	1	93769180	T	C	6.56647	0.0732449
	SOVchr1-93769212	1	93769212	T	C	6.56647	0.0732449
	SOVchr1-93773994	1	93773994	T	C	6.56647	0.0732449
	SOVchr1-93774182	1	93774182	G	T	6.56647	0.0732449
	SOVchr1-93777305	1	93777305	C	T	6.56647	0.0732449
	SOVchr1-93785401	1	93785401	A	G	6.56647	0.0732449
	SOVchr1-93795674	1	93795674	A	G	6.56647	0.0732449
	SOVchr1-93797988	1	93797988	G	C	6.56647	0.0732449
	SOVchr1-93818134	1	93818134	T	G	6.56647	0.0732449
	SOVchr1-93825270	1	93825270	T	G	6.56647	0.0732449
	SOVchr1-93831273	1	93831273	T	C	6.56647	0.0732449
	SOVchr1-93831289	1	93831289	A	T	6.56647	0.0732449
	SOVchr1-93836920	1	93836920	T	A	6.56647	0.0732449
	SOVchr1-93836944	1	93836944	A	G	6.56647	0.0732449
	SOVchr1-93836952	1	93836952	A	G	6.56647	0.0732449
	SOVchr1-93842427	1	93842427	A	G	6.56647	0.0732449
	SOVchr5-98265759	5	98265759	G	A	6.5643	0.0626107
	SOVchr6-20668040	6	20668040	A	C	6.55393	0.10995
	SOVchr6-20668050	6	20668050	C	T	6.55393	0.10995
Oxalate	SOVchr1-50807332	1	50807332	G	T	7.33618	2.70169
	SOVchr1-119069592	1	119069592	T	C	6.94529	1.16409
	SOVchr3-43424516	3	43424516	C	T	6.61585	2.44416
	SOVchr1-50565605	1	50565605	C	T	6.56407	1.50673
	SOVchr1-14238191	1	14238191	A	G	6.5305	1.54084
Nitrate	SOVchr1-94223208	1	94223208	T	C	7.21791	0.531952
	SOVchr1-94072908	1	94072908	C	T	7.20939	0.50862
	SOVchr1-95326440	1	95326440	C	T	7.1262	0.521387
	SOVchr6-133695190	6	133695190	T	A	6.90075	0.700393
	SOVchr1-94060111	1	94060111	A	G	6.75907	0.474744
	SOVchr4-148946915	4	148946915	G	T	6.73635	0.605965
	SOVchr4-148947017	4	148947017	A	G	6.73635	0.605965
	SOVchr1-64960432	1	64960432	T	G	6.71495	0.626185
	SOVchr1-9323565	1	9323565	A	G	6.67137	0.510682
	SOVchr1-64636577	1	64636577	A	T	6.62083	0.582104
	SOVchr1-94071514	1	94071514	G	A	6.55175	0.501156
	SOVchr1-94073322	1	94073322	A	G	6.55175	0.501156
	SOVchr1-94073423	1	94073423	T	G	6.55175	0.501156
	SOVchr1-94085756	1	94085756	A	T	6.52655	0.491619
Soluble Sugar	SOVchr2-108273175	2	108273175	T	A	8.9797	0.270465
	SOVchr1-122779550	1	122779550	T	A	6.5326	0.22754
Mn	SOVchr4-54452300	4	54452300	C	T	6.79751	1.96256
	SOVchr5-42208975	5	42208975	A	G	6.71853	1.29903
	SOVchr4-55036646	4	55036646	T	C	6.64995	2.17852
Cu	SOVchr2-26477848	2	26477848	A	G	13.5808	1.9426
	SOVchr2-26477853	2	26477853	T	C	13.5808	1.9426
	SOVchr2-26477868	2	26477868	T	G	13.5808	1.9426
	SOVchr2-26477875	2	26477875	G	A	13.5808	1.9426
	SOVchr2-26477893	2	26477893	C	T	13.5808	1.9426
	SOVchr2-26477933	2	26477933	T	C	13.5808	1.9426
	SOVchr2-105094612	2	105094612	T	C	13.5808	1.9426
	SOVchr1-6225211	1	6225211	C	A	10.6783	0.531521
	SOVchr5-114980769	5	114980769	A	G	10.3579	0.618009
	SOVchr3-110562367	3	110562367	A	T	10.3454	1.41807
	SOVchr5-16012107	5	16012107	A	T	10.0492	0.497092
	SOVchr5-16012323	5	16012323	C	T	10.0492	0.497092
	SOVchr5-16012345	5	16012345	C	T	10.0492	0.497092
	SOVchr5-28533821	5	28533821	T	C	10.0492	0.497092
	SOVchr5-67786486	5	67786486	C	G	10.033	0.697444
	SOVchr5-83737709	5	83737709	G	A	10.033	0.697444
	SOVchr5-83737710	5	83737710	G	A	10.033	0.697444
	SOVchr5-114821919	5	114821919	G	A	10.033	0.697444
	SOVchr5-124714875	5	124714875	A	T	10.033	0.697444
	SOVchr1-62553767	1	62553767	C	T	9.75355	0.636584
	SOVchr1-20441631	1	20441631	A	G	9.64414	0.488663
	SOVchr5-4118488	5	4118488	G	T	9.46398	0.68894
	SOVchr5-28570298	5	28570298	C	T	9.40785	0.527309
	SOVchr4-176778617	4	176778617	C	T	9.36355	0.669191
	SOVchr4-26146213	4	26146213	T	A	9.2547	0.675969
	SOVchr5-18390995	5	18390995	C	A	9.2547	0.675969
	SOVchr5-108055092	5	108055092	A	G	9.2547	0.675969
	SOVchr5-108064882	5	108064882	G	T	9.2547	0.675969
	SOVchr5-108079549	5	108079549	T	A	9.2547	0.675969
	SOVchr5-108080669	5	108080669	C	G	9.2547	0.675969
	SOVchr5-109142928	5	109142928	C	T	9.2547	0.675969
	SOVchr5-112190150	5	112190150	G	A	9.2547	0.675969
	SOVchr5-114304375	5	114304375	C	T	9.2547	0.675969
	SOVchr5-114386295	5	114386295	G	C	9.2547	0.675969
	SOVchr5-115189652	5	115189652	A	G	9.2547	0.675969
	SOVchr5-115226309	5	115226309	T	C	9.2547	0.675969
	SOVchr5-115503133	5	115503133	T	C	9.2547	0.675969
	SOVchr5-115512077	5	115512077	T	C	9.2547	0.675969
	SOVchr5-115513488	5	115513488	A	T	9.2547	0.675969
	SOVchr5-115517423	5	115517423	G	T	9.2547	0.675969
	SOVchr5-115775854	5	115775854	A	C	9.2547	0.675969
	SOVchr5-116033633	5	116033633	C	T	9.2547	0.675969
	SOVchr5-116795303	5	116795303	C	T	9.2547	0.675969
	SOVchr5-118704748	5	118704748	G	T	9.2547	0.675969
	SOVchr1-6459582	1	6459582	G	A	8.76454	0.670459
	SOVchr1-6459599	1	6459599	G	A	8.76454	0.670459
	SOVchr1-5489765	1	5489765	A	G	8.73436	0.419383
	SOVchr5-18606502	5	18606502	G	A	8.65109	0.643235
	SOVchr5-56994299	5	56994299	G	A	8.65109	0.643235
	SOVchr5-56994317	5	56994317	G	C	8.65109	0.643235
	SOVchr5-57301324	5	57301324	C	T	8.65109	0.643235
	SOVchr5-58323106	5	58323106	G	T	8.65109	0.643235
	SOVchr5-70017467	5	70017467	C	T	8.65109	0.643235
	SOVchr5-99988343	5	99988343	G	T	8.65109	0.643235
	SOVchr5-114278162	5	114278162	C	T	8.65109	0.643235
	SOVchr5-114325481	5	114325481	G	A	8.65109	0.643235
	SOVchr5-114430338	5	114430338	G	A	8.65109	0.643235
	SOVchr5-114964324	5	114964324	G	A	8.65109	0.643235
	SOVchr5-115225461	5	115225461	G	T	8.65109	0.643235
	SOVchr5-115833336	5	115833336	G	A	8.65109	0.643235
	SOVchr5-115872102	5	115872102	C	T	8.65109	0.643235
	SOVchr5-115917684	5	115917684	C	T	8.65109	0.643235
	SOVchr5-116731411	5	116731411	G	A	8.65109	0.643235
	SOVchr5-116810309	5	116810309	A	T	8.65109	0.643235
	SOVchr5-124178672	5	124178672	C	A	8.65109	0.643235
	SOVchr5-56212927	5	56212927	T	C	8.54338	0.63363
	SOVchr6-79791403	6	79791403	T	C	8.54338	0.63363
	SOVchr5-116849144	5	116849144	C	T	8.53524	0.71963
	SOVchr5-120935137	5	120935137	C	T	8.53524	0.71963
	SOVchr5-67457570	5	67457570	C	A	8.38618	0.638607
	SOVchr5-67457921	5	67457921	G	A	8.38618	0.638607
	SOVchr5-116837156	5	116837156	G	A	8.38618	0.638607
	SOVchr5-120185100	5	120185100	G	A	8.38618	0.638607
	SOVchr5-49882516	5	49882516	C	T	8.36532	0.635596
	SOVchr5-122183489	5	122183489	G	T	8.36532	0.635596
	SOVchr4-5654793	4	5654793	G	A	8.36292	0.460479
	SOVchr5-20794606	5	20794606	T	G	8.34518	0.587874
	SOVchr5-20794667	5	20794667	G	A	8.34518	0.587874
	SOVchr5-33803083	5	33803083	C	T	8.34518	0.587874
	SOVchr5-66872065	5	66872065	C	T	8.33516	0.621701
	SOVchr5-66919578	5	66919578	G	A	8.33516	0.621701
	SOVchr5-116722821	5	116722821	C	T	8.31144	0.635891
	SOVchr5-116734761	5	116734761	C	A	8.31144	0.635891
	SOVchr5-116856359	5	116856359	A	G	8.31144	0.635891
	SOVchr5-117003122	5	117003122	C	T	8.31144	0.635891
	SOVchr5-117417340	5	117417340	C	T	8.31144	0.635891
	SOVchr5-117417341	5	117417341	C	T	8.31144	0.635891
	SOVchr5-117498810	5	117498810	C	G	8.31144	0.635891
	SOVchr5-118883596	5	118883596	G	A	8.31144	0.635891
	SOVchr5-119683808	5	119683808	A	C	8.31144	0.635891
	SOVchr5-119739274	5	119739274	G	A	8.31144	0.635891
	SOVchr5-121808317	5	121808317	G	A	8.31144	0.635891
	SOVchr5-122961244	5	122961244	T	C	8.31144	0.635891
	SOVchr5-123301804	5	123301804	C	T	8.31144	0.635891
	SOVchr5-124987464	5	124987464	G	A	8.31144	0.635891
	SOVchr5-125108769	5	125108769	C	T	8.31144	0.635891
	SOVchr5-125390073	5	125390073	C	T	8.31144	0.635891
	SOVchr5-18579158	5	18579158	C	T	8.28245	0.639815
	SOVchr5-18607026	5	18607026	G	A	8.28245	0.639815
	SOVchr5-20799782	5	20799782	C	T	8.28245	0.639815
	SOVchr5-20799870	5	20799870	G	A	8.28245	0.639815
	SOVchr5-99607956	5	99607956	C	A	8.28245	0.639815
	SOVchr5-99650784	5	99650784	G	A	8.28245	0.639815
	SOVchr5-112027158	5	112027158	T	A	8.28245	0.639815
	SOVchr5-112179384	5	112179384	C	G	8.28245	0.639815
	SOVchr5-112180706	5	112180706	C	T	8.28245	0.639815
	SOVchr5-112182130	5	112182130	C	T	8.28245	0.639815
	SOVchr5-112182736	5	112182736	C	T	8.28245	0.639815
	SOVchr5-112183265	5	112183265	T	C	8.28245	0.639815
	SOVchr5-112186715	5	112186715	G	T	8.28245	0.639815
	SOVchr5-112186766	5	112186766	G	T	8.28245	0.639815
	SOVchr5-112187269	5	112187269	G	C	8.28245	0.639815
	SOVchr5-112188836	5	112188836	C	A	8.28245	0.639815
	SOVchr5-112192938	5	112192938	G	A	8.28245	0.639815
	SOVchr5-112193317	5	112193317	G	T	8.28245	0.639815
	SOVchr5-112195250	5	112195250	C	T	8.28245	0.639815
	SOVchr5-112197307	5	112197307	A	T	8.28245	0.639815
	SOVchr5-112198798	5	112198798	A	C	8.28245	0.639815
	SOVchr5-112200581	5	112200581	G	A	8.28245	0.639815
	SOVchr5-112201159	5	112201159	C	A	8.28245	0.639815
	SOVchr5-112202476	5	112202476	A	T	8.28245	0.639815
	SOVchr5-114258956	5	114258956	G	A	8.28245	0.639815
	SOVchr5-114324962	5	114324962	C	A	8.28245	0.639815
	SOVchr5-114413874	5	114413874	T	A	8.28245	0.639815
	SOVchr5-114422853	5	114422853	T	A	8.28245	0.639815
	SOVchr5-114435499	5	114435499	G	A	8.28245	0.639815
	SOVchr5-114457121	5	114457121	G	T	8.28245	0.639815
	SOVchr5-114459874	5	114459874	T	G	8.28245	0.639815
	SOVchr5-114505182	5	114505182	T	C	8.28245	0.639815
	SOVchr5-114519055	5	114519055	G	C	8.28245	0.639815
	SOVchr5-114549636	5	114549636	G	A	8.28245	0.639815
	SOVchr5-114568276	5	114568276	C	T	8.28245	0.639815
	SOVchr5-114568958	5	114568958	G	A	8.28245	0.639815
	SOVchr5-114570023	5	114570023	C	T	8.28245	0.639815
	SOVchr5-114606956	5	114606956	C	T	8.28245	0.639815
	SOVchr5-114610467	5	114610467	C	T	8.28245	0.639815
	SOVchr5-114613666	5	114613666	G	T	8.28245	0.639815
	SOVchr5-114618700	5	114618700	G	A	8.28245	0.639815
	SOVchr5-114628621	5	114628621	G	C	8.28245	0.639815
	SOVchr5-114740057	5	114740057	T	C	8.28245	0.639815
	SOVchr5-114756187	5	114756187	T	A	8.28245	0.639815
	SOVchr5-114769377	5	114769377	G	C	8.28245	0.639815
	SOVchr5-114774315	5	114774315	T	C	8.28245	0.639815
	SOVchr5-114774486	5	114774486	G	A	8.28245	0.639815
	SOVchr5-114811721	5	114811721	C	T	8.28245	0.639815
	SOVchr5-114844629	5	114844629	C	G	8.28245	0.639815
	SOVchr5-114858195	5	114858195	G	A	8.28245	0.639815
	SOVchr5-114881971	5	114881971	C	G	8.28245	0.639815
	SOVchr5-114882199	5	114882199	A	G	8.28245	0.639815
	SOVchr5-114938115	5	114938115	G	C	8.28245	0.639815
	SOVchr5-114979826	5	114979826	C	G	8.28245	0.639815
	SOVchr5-114987725	5	114987725	G	A	8.28245	0.639815
	SOVchr5-115136769	5	115136769	C	A	8.28245	0.639815
	SOVchr5-115188804	5	115188804	C	T	8.28245	0.639815
	SOVchr5-115203497	5	115203497	A	T	8.28245	0.639815
	SOVchr5-115262610	5	115262610	A	T	8.28245	0.639815
	SOVchr5-115277059	5	115277059	A	T	8.28245	0.639815
	SOVchr5-115294388	5	115294388	A	G	8.28245	0.639815
	SOVchr5-115304473	5	115304473	G	T	8.28245	0.639815
	SOVchr5-115308582	5	115308582	G	A	8.28245	0.639815
	SOVchr5-115326251	5	115326251	G	A	8.28245	0.639815
	SOVchr5-115336852	5	115336852	G	T	8.28245	0.639815
	SOVchr5-115338750	5	115338750	C	A	8.28245	0.639815
	SOVchr5-115400058	5	115400058	C	T	8.28245	0.639815
	SOVchr5-115479763	5	115479763	C	A	8.28245	0.639815
	SOVchr5-115494535	5	115494535	A	G	8.28245	0.639815
	SOVchr5-115503464	5	115503464	A	G	8.28245	0.639815
	SOVchr5-115505077	5	115505077	A	G	8.28245	0.639815
	SOVchr5-115506463	5	115506463	A	G	8.28245	0.639815
	SOVchr5-115507057	5	115507057	C	T	8.28245	0.639815
	SOVchr5-115507090	5	115507090	A	G	8.28245	0.639815
	SOVchr5-115507258	5	115507258	C	A	8.28245	0.639815
	SOVchr5-115507290	5	115507290	C	T	8.28245	0.639815
	SOVchr5-115508292	5	115508292	T	G	8.28245	0.639815
	SOVchr5-115508327	5	115508327	C	T	8.28245	0.639815
	SOVchr5-115510730	5	115510730	G	T	8.28245	0.639815
	SOVchr5-115511189	5	115511189	G	A	8.28245	0.639815
	SOVchr5-115512925	5	115512925	T	A	8.28245	0.639815
	SOVchr5-115513288	5	115513288	A	C	8.28245	0.639815
	SOVchr5-115516683	5	115516683	G	C	8.28245	0.639815
	SOVchr5-115518115	5	115518115	C	A	8.28245	0.639815
	SOVchr5-115520111	5	115520111	G	C	8.28245	0.639815
	SOVchr5-115539548	5	115539548	G	T	8.28245	0.639815
	SOVchr5-115554497	5	115554497	T	G	8.28245	0.639815
	SOVchr5-115562387	5	115562387	T	C	8.28245	0.639815
	SOVchr5-115653153	5	115653153	G	A	8.28245	0.639815
	SOVchr5-115656821	5	115656821	C	G	8.28245	0.639815
	SOVchr5-115682988	5	115682988	C	A	8.28245	0.639815
	SOVchr5-115690369	5	115690369	G	T	8.28245	0.639815
	SOVchr5-115863646	5	115863646	G	T	8.28245	0.639815
	SOVchr5-115882513	5	115882513	C	G	8.28245	0.639815
	SOVchr5-115891889	5	115891889	A	T	8.28245	0.639815
	SOVchr5-115900367	5	115900367	G	A	8.28245	0.639815
	SOVchr5-115911468	5	115911468	A	G	8.28245	0.639815
	SOVchr5-115917981	5	115917981	C	G	8.28245	0.639815
	SOVchr5-115917983	5	115917983	G	A	8.28245	0.639815
	SOVchr5-115940357	5	115940357	A	G	8.28245	0.639815
	SOVchr5-115953767	5	115953767	C	G	8.28245	0.639815
	SOVchr5-115969775	5	115969775	G	A	8.28245	0.639815
	SOVchr5-116000730	5	116000730	T	G	8.28245	0.639815
	SOVchr5-116006191	5	116006191	C	G	8.28245	0.639815
	SOVchr5-116019020	5	116019020	T	C	8.28245	0.639815
	SOVchr5-116019021	5	116019021	C	T	8.28245	0.639815
	SOVchr5-116025231	5	116025231	C	A	8.28245	0.639815
	SOVchr5-116054545	5	116054545	G	A	8.28245	0.639815
	SOVchr5-116060046	5	116060046	G	A	8.28245	0.639815
	SOVchr5-116082114	5	116082114	G	A	8.28245	0.639815
	SOVchr5-116127594	5	116127594	T	A	8.28245	0.639815
	SOVchr5-116263013	5	116263013	C	T	8.28245	0.639815
	SOVchr5-116576453	5	116576453	C	A	8.28245	0.639815
	SOVchr5-116576468	5	116576468	T	A	8.28245	0.639815
	SOVchr5-116678326	5	116678326	A	G	8.28245	0.639815
	SOVchr5-116834114	5	116834114	G	A	8.28245	0.639815
	SOVchr5-116886632	5	116886632	A	G	8.28245	0.639815
	SOVchr5-117031779	5	117031779	G	C	8.28245	0.639815
	SOVchr5-117306350	5	117306350	G	A	8.28245	0.639815
	SOVchr5-117415875	5	117415875	C	T	8.28245	0.639815
	SOVchr5-117730956	5	117730956	A	G	8.28245	0.639815
	SOVchr5-117883710	5	117883710	A	T	8.28245	0.639815
	SOVchr5-117962007	5	117962007	C	A	8.28245	0.639815
	SOVchr5-120177015	5	120177015	C	T	8.28245	0.639815
	SOVchr5-120954618	5	120954618	T	C	8.28245	0.639815
	SOVchr5-121591978	5	121591978	T	G	8.28245	0.639815
	SOVchr5-121941566	5	121941566	T	A	8.28245	0.639815
	SOVchr5-123558015	5	123558015	C	A	8.28245	0.639815
	SOVchr5-124712831	5	124712831	G	A	8.28245	0.639815
	SOVchr5-125260717	5	125260717	G	A	8.28245	0.639815
	SOVchr5-116318027	5	116318027	C	G	8.26021	0.722226
	SOVchr5-119394483	5	119394483	T	A	8.26021	0.722226
	SOVchr5-120817195	5	120817195	C	T	8.26021	0.722226
	SOVchr5-122881510	5	122881510	T	G	8.26021	0.722226
	SOVchr5-125005424	5	125005424	A	T	8.26021	0.722226
	SOVchr5-31087052	5	31087052	G	A	8.08561	0.685742
	SOVchr5-117281186	5	117281186	A	T	8.05077	0.724064
	SOVchr4-6482588	4	6482588	T	C	8.0193	0.509176
	SOVchr4-62172317	4	62172317	C	G	8.00253	0.611593
	SOVchr5-30978693	5	30978693	T	C	7.9896	0.632763
	SOVchr5-116566450	5	116566450	G	A	7.9896	0.632763
	SOVchr5-116589768	5	116589768	G	A	7.9896	0.632763
	SOVchr5-116659943	5	116659943	G	A	7.9896	0.632763
	SOVchr5-116890257	5	116890257	T	A	7.9896	0.632763
	SOVchr5-117906653	5	117906653	C	T	7.9896	0.632763
	SOVchr5-119416896	5	119416896	C	A	7.9896	0.632763
	SOVchr5-119520785	5	119520785	C	T	7.9896	0.632763
	SOVchr5-119580609	5	119580609	A	G	7.9896	0.632763
	SOVchr5-120283478	5	120283478	C	A	7.9896	0.632763
	SOVchr5-120895257	5	120895257	C	T	7.9896	0.632763
	SOVchr5-121824434	5	121824434	T	A	7.9896	0.632763
	SOVchr5-122371293	5	122371293	C	T	7.9896	0.632763
	SOVchr5-56779100	5	56779100	G	A	7.95792	0.611133
	SOVchr5-57291463	5	57291463	C	T	7.95792	0.611133
	SOVchr4-16615242	4	16615242	C	T	7.93936	0.613547
	SOVchr5-108578749	5	108578749	C	T	7.93936	0.613547
	SOVchr5-108977210	5	108977210	T	C	7.93936	0.613547
	SOVchr5-109129308	5	109129308	A	G	7.93936	0.613547
	SOVchr5-109209722	5	109209722	C	A	7.92438	0.483924
	SOVchr5-116356664	5	116356664	T	A	7.90419	0.609644
	SOVchr5-30968799	5	30968799	T	C	7.89604	0.628609
	SOVchr5-116301994	5	116301994	G	A	7.89604	0.628609
	SOVchr5-116613763	5	116613763	A	T	7.89604	0.628609
	SOVchr5-116641898	5	116641898	C	T	7.89604	0.628609
	SOVchr5-116762016	5	116762016	A	T	7.89604	0.628609
	SOVchr5-116780390	5	116780390	C	T	7.89604	0.628609
	SOVchr5-117220381	5	117220381	C	T	7.89604	0.628609
	SOVchr5-117834767	5	117834767	T	C	7.89604	0.628609
	SOVchr5-118549650	5	118549650	G	A	7.89604	0.628609
	SOVchr5-119324553	5	119324553	G	A	7.89604	0.628609
	SOVchr5-121092841	5	121092841	C	T	7.89604	0.628609
	SOVchr5-122840425	5	122840425	T	G	7.89604	0.628609
	SOVchr5-124610816	5	124610816	G	A	7.89604	0.628609
	SOVchr5-125108518	5	125108518	T	A	7.89604	0.628609
	SOVchr5-125108543	5	125108543	C	T	7.89604	0.628609
	SOVchr5-125149320	5	125149320	G	A	7.89604	0.628609
	SOVchr1-6146538	1	6146538	G	T	7.84592	0.514846
	SOVchr1-5648351	1	5648351	C	T	7.82299	0.545177
	SOVchr1-6237283	1	6237283	G	A	7.82299	0.545177
	SOVchr5-28551821	5	28551821	T	C	7.807	0.431409
	SOVchr5-33725387	5	33725387	G	A	7.71742	0.567455
	SOVchr5-52830408	5	52830408	T	G	7.70894	0.534565
	SOVchr4-25847511	4	25847511	T	A	7.68816	0.609534
	SOVchr4-26412106	4	26412106	G	T	7.68816	0.609534
	SOVchr4-26562297	4	26562297	G	A	7.68816	0.609534
	SOVchr5-56635523	5	56635523	G	A	7.68772	0.679998
	SOVchr3-35234200	3	35234200	T	C	7.65736	0.502815
	SOVchr2-111597389	2	111597389	C	A	7.63264	0.527247
	SOVchr4-62408400	4	62408400	A	C	7.63018	0.662311
	SOVchr5-117249024	5	117249024	T	A	7.62932	0.548582
	SOVchr4-164609486	4	164609486	C	T	7.59402	0.634034
	SOVchr5-114054254	5	114054254	G	A	7.59164	0.563904
	SOVchr5-16611133	5	16611133	C	G	7.585	0.605197
	SOVchr5-56557120	5	56557120	A	T	7.585	0.605197
	SOVchr5-93820778	5	93820778	G	A	7.585	0.605197
	SOVchr2-111596382	2	111596382	T	A	7.53072	0.546073
	SOVchr5-56988106	5	56988106	G	A	7.52065	0.60354
	SOVchr5-57812845	5	57812845	C	A	7.52065	0.60354
	SOVchr5-58260205	5	58260205	G	T	7.52065	0.60354
	SOVchr5-58283700	5	58283700	G	T	7.52065	0.60354
	SOVchr5-58290240	5	58290240	C	A	7.52065	0.60354
	SOVchr5-58565513	5	58565513	G	T	7.52065	0.60354
	SOVchr5-62727943	5	62727943	G	T	7.52065	0.60354
	SOVchr5-62738284	5	62738284	C	T	7.52065	0.60354
	SOVchr5-116199356	5	116199356	C	G	7.52065	0.60354
	SOVchr5-116701213	5	116701213	C	T	7.52065	0.60354
	SOVchr5-116760619	5	116760619	C	A	7.52065	0.60354
	SOVchr5-116836753	5	116836753	C	T	7.52065	0.60354
	SOVchr5-117442222	5	117442222	C	T	7.52065	0.60354
	SOVchr5-117723993	5	117723993	C	T	7.52065	0.60354
	SOVchr5-119182480	5	119182480	C	T	7.52065	0.60354
	SOVchr5-119901106	5	119901106	T	A	7.52065	0.60354
	SOVchr5-122582141	5	122582141	G	A	7.52065	0.60354
	SOVchr5-123176431	5	123176431	C	A	7.52065	0.60354
	SOVchr5-123393559	5	123393559	G	T	7.52065	0.60354
	SOVchr5-124160599	5	124160599	G	C	7.52065	0.60354
	SOVchr5-108580345	5	108580345	A	T	7.50786	0.602016
	SOVchr5-109086396	5	109086396	A	T	7.50786	0.602016
	SOVchr5-109151911	5	109151911	C	T	7.50786	0.602016
	SOVchr5-109216391	5	109216391	C	T	7.50786	0.602016
	SOVchr5-109835022	5	109835022	C	G	7.50786	0.602016
	SOVchr5-116144104	5	116144104	T	C	7.50786	0.602016
	SOVchr5-120033528	5	120033528	G	A	7.50592	0.685493
	SOVchr5-120326209	5	120326209	G	T	7.50592	0.685493
	SOVchr5-22302202	5	22302202	G	A	7.50439	0.514144
	SOVchr5-6178030	5	6178030	A	C	7.49822	0.432109
	SOVchr5-6258268	5	6258268	C	T	7.47913	0.430029
	SOVchr5-28551366	5	28551366	T	G	7.41228	0.431121
	SOVchr5-28593857	5	28593857	T	C	7.41228	0.431121
	SOVchr5-116293343	5	116293343	G	A	7.40653	0.597717
	SOVchr5-116478630	5	116478630	G	T	7.40653	0.597717
	SOVchr5-116509698	5	116509698	T	C	7.40653	0.597717
	SOVchr5-116569599	5	116569599	C	T	7.40653	0.597717
	SOVchr5-116658102	5	116658102	G	T	7.40653	0.597717
	SOVchr5-116692532	5	116692532	T	A	7.40653	0.597717
	SOVchr5-116752085	5	116752085	C	G	7.40653	0.597717
	SOVchr5-116814438	5	116814438	A	G	7.40653	0.597717
	SOVchr5-116838043	5	116838043	G	A	7.40653	0.597717
	SOVchr5-116859057	5	116859057	G	A	7.40653	0.597717
	SOVchr5-116877844	5	116877844	G	A	7.40653	0.597717
	SOVchr5-117169273	5	117169273	T	C	7.40653	0.597717
	SOVchr5-117225439	5	117225439	C	A	7.40653	0.597717
	SOVchr5-117334063	5	117334063	G	T	7.40653	0.597717
	SOVchr5-117748426	5	117748426	A	T	7.40653	0.597717
	SOVchr5-117748427	5	117748427	G	A	7.40653	0.597717
	SOVchr5-117985467	5	117985467	C	A	7.40653	0.597717
	SOVchr5-118033563	5	118033563	A	T	7.40653	0.597717
	SOVchr5-118543082	5	118543082	A	G	7.40653	0.597717
	SOVchr5-118840488	5	118840488	G	T	7.40653	0.597717
	SOVchr5-118958036	5	118958036	T	A	7.40653	0.597717
	SOVchr5-119054689	5	119054689	C	T	7.40653	0.597717
	SOVchr5-119111534	5	119111534	C	T	7.40653	0.597717
	SOVchr5-119561630	5	119561630	T	G	7.40653	0.597717
	SOVchr5-119855148	5	119855148	G	A	7.40653	0.597717
	SOVchr5-119986850	5	119986850	C	A	7.40653	0.597717
	SOVchr5-120517396	5	120517396	T	A	7.40653	0.597717
	SOVchr5-122731958	5	122731958	G	C	7.40653	0.597717
	SOVchr5-124164013	5	124164013	G	T	7.40653	0.597717
	SOVchr5-125143468	5	125143468	G	T	7.40653	0.597717
	SOVchr5-68121517	5	68121517	A	G	7.39582	0.613356
	SOVchr5-116199411	5	116199411	C	A	7.39582	0.613356
	SOVchr5-116212712	5	116212712	A	C	7.39582	0.613356
	SOVchr5-116258611	5	116258611	G	A	7.39582	0.613356
	SOVchr5-116289753	5	116289753	T	C	7.39582	0.613356
	SOVchr5-116331032	5	116331032	G	T	7.39582	0.613356
	SOVchr5-116346908	5	116346908	C	T	7.39582	0.613356
	SOVchr5-116382713	5	116382713	G	A	7.39582	0.613356
	SOVchr5-116439520	5	116439520	C	T	7.39582	0.613356
	SOVchr5-116456138	5	116456138	C	A	7.39582	0.613356
	SOVchr5-116456182	5	116456182	C	A	7.39582	0.613356
	SOVchr5-116456183	5	116456183	A	C	7.39582	0.613356
	SOVchr5-116467617	5	116467617	C	T	7.39582	0.613356
	SOVchr5-116481913	5	116481913	C	A	7.39582	0.613356
	SOVchr5-116521632	5	116521632	G	A	7.39582	0.613356
	SOVchr5-116572581	5	116572581	G	A	7.39582	0.613356
	SOVchr5-116594722	5	116594722	A	G	7.39582	0.613356
	SOVchr5-116603538	5	116603538	A	T	7.39582	0.613356
	SOVchr5-116609799	5	116609799	C	T	7.39582	0.613356
	SOVchr5-116687166	5	116687166	C	T	7.39582	0.613356
	SOVchr5-116698022	5	116698022	C	T	7.39582	0.613356
	SOVchr5-116704171	5	116704171	C	A	7.39582	0.613356
	SOVchr5-116713414	5	116713414	G	A	7.39582	0.613356
	SOVchr5-116718074	5	116718074	C	G	7.39582	0.613356
	SOVchr5-116751744	5	116751744	G	T	7.39582	0.613356
	SOVchr5-116755473	5	116755473	G	T	7.39582	0.613356
	SOVchr5-116760727	5	116760727	C	A	7.39582	0.613356
	SOVchr5-116760741	5	116760741	A	G	7.39582	0.613356
	SOVchr5-116785640	5	116785640	G	T	7.39582	0.613356
	SOVchr5-116812478	5	116812478	C	G	7.39582	0.613356
	SOVchr5-116828854	5	116828854	G	T	7.39582	0.613356
	SOVchr5-116891138	5	116891138	C	T	7.39582	0.613356
	SOVchr5-116985312	5	116985312	A	T	7.39582	0.613356
	SOVchr5-117329555	5	117329555	A	T	7.39582	0.613356
	SOVchr5-117331764	5	117331764	G	T	7.39582	0.613356
	SOVchr5-117412996	5	117412996	G	T	7.39582	0.613356
	SOVchr5-117438777	5	117438777	C	T	7.39582	0.613356
	SOVchr5-117448315	5	117448315	T	C	7.39582	0.613356
	SOVchr5-117462821	5	117462821	G	A	7.39582	0.613356
	SOVchr5-117532954	5	117532954	G	T	7.39582	0.613356
	SOVchr5-117535754	5	117535754	A	T	7.39582	0.613356
	SOVchr5-117865265	5	117865265	G	T	7.39582	0.613356
	SOVchr5-117885380	5	117885380	C	G	7.39582	0.613356
	SOVchr5-117963470	5	117963470	T	G	7.39582	0.613356
	SOVchr5-118173698	5	118173698	C	T	7.39582	0.613356
	SOVchr5-118183115	5	118183115	T	G	7.39582	0.613356
	SOVchr5-118356917	5	118356917	G	A	7.39582	0.613356
	SOVchr5-118380644	5	118380644	T	A	7.39582	0.613356
	SOVchr5-119469215	5	119469215	G	C	7.39582	0.613356
	SOVchr5-119500808	5	119500808	T	C	7.39582	0.613356
	SOVchr5-119559284	5	119559284	G	A	7.39582	0.613356
	SOVchr5-119637068	5	119637068	A	G	7.39582	0.613356
	SOVchr5-119673780	5	119673780	C	T	7.39582	0.613356
	SOVchr5-119764776	5	119764776	G	C	7.39582	0.613356
	SOVchr5-119914600	5	119914600	G	A	7.39582	0.613356
	SOVchr5-119980916	5	119980916	G	A	7.39582	0.613356
	SOVchr5-120429066	5	120429066	C	G	7.39582	0.613356
	SOVchr5-120496574	5	120496574	C	A	7.39582	0.613356
	SOVchr5-120589851	5	120589851	C	T	7.39582	0.613356
	SOVchr5-120734920	5	120734920	G	A	7.39582	0.613356
	SOVchr5-120741093	5	120741093	A	G	7.39582	0.613356
	SOVchr5-120769794	5	120769794	G	A	7.39582	0.613356
	SOVchr5-120926516	5	120926516	C	G	7.39582	0.613356
	SOVchr5-120978055	5	120978055	C	T	7.39582	0.613356
	SOVchr5-120984899	5	120984899	G	T	7.39582	0.613356
	SOVchr5-121381033	5	121381033	A	T	7.39582	0.613356
	SOVchr5-121479124	5	121479124	G	A	7.39582	0.613356
	SOVchr5-122798296	5	122798296	A	G	7.39582	0.613356
	SOVchr5-122826286	5	122826286	C	A	7.39582	0.613356
	SOVchr5-122974962	5	122974962	G	A	7.39582	0.613356
	SOVchr5-122987728	5	122987728	G	A	7.39582	0.613356
	SOVchr5-123299897	5	123299897	T	A	7.39582	0.613356
	SOVchr5-123388588	5	123388588	C	T	7.39582	0.613356
	SOVchr5-123406125	5	123406125	G	A	7.39582	0.613356
	SOVchr5-124473968	5	124473968	G	C	7.39582	0.613356
	SOVchr5-124771536	5	124771536	C	A	7.39582	0.613356
	SOVchr5-124966876	5	124966876	C	G	7.39582	0.613356
	SOVchr5-124990702	5	124990702	C	T	7.39582	0.613356
	SOVchr5-124990936	5	124990936	G	A	7.39582	0.613356
	SOVchr5-125012013	5	125012013	A	T	7.39582	0.613356
	SOVchr5-125088443	5	125088443	G	A	7.39582	0.613356
	SOVchr5-125191990	5	125191990	T	C	7.39582	0.613356
	SOVchr5-125194805	5	125194805	G	A	7.39582	0.613356
	SOVchr5-125303014	5	125303014	T	C	7.39582	0.613356
	SOVchr5-6258306	5	6258306	C	T	7.38711	0.386976
	SOVchr5-30990838	5	30990838	C	A	7.38581	0.606989
	SOVchr5-30991814	5	30991814	G	A	7.38581	0.606989
	SOVchr5-116180925	5	116180925	G	A	7.38581	0.606989
	SOVchr5-116519988	5	116519988	T	C	7.38581	0.606989
	SOVchr5-116537842	5	116537842	C	T	7.38581	0.606989
	SOVchr5-116788103	5	116788103	C	A	7.38581	0.606989
	SOVchr5-117215464	5	117215464	C	T	7.38581	0.606989
	SOVchr5-118598958	5	118598958	G	C	7.38581	0.606989
	SOVchr5-118839074	5	118839074	C	T	7.38581	0.606989
	SOVchr5-119729409	5	119729409	A	G	7.38581	0.606989
	SOVchr5-119863711	5	119863711	G	T	7.38581	0.606989
	SOVchr5-119896913	5	119896913	A	C	7.38581	0.606989
	SOVchr5-119932193	5	119932193	C	A	7.38581	0.606989
	SOVchr5-120309018	5	120309018	G	A	7.38581	0.606989
	SOVchr5-120710590	5	120710590	C	T	7.38581	0.606989
	SOVchr5-120812082	5	120812082	T	C	7.38581	0.606989
	SOVchr5-121424577	5	121424577	G	A	7.38581	0.606989
	SOVchr5-121541134	5	121541134	C	A	7.38581	0.606989
	SOVchr5-121938958	5	121938958	G	A	7.38581	0.606989
	SOVchr5-124964908	5	124964908	C	T	7.38581	0.606989
	SOVchr5-125108123	5	125108123	C	A	7.38581	0.606989
	SOVchr5-125108135	5	125108135	G	A	7.38581	0.606989
	SOVchr4-8537782	4	8537782	G	A	7.36143	0.597743
	SOVchr4-8592989	4	8592989	G	A	7.36143	0.597743
	SOVchr4-8631162	4	8631162	G	A	7.36143	0.597743
	SOVchr4-8864350	4	8864350	C	T	7.36143	0.597743
	SOVchr1-5802984	1	5802984	G	A	7.34387	0.461355
	SOVchr1-6487478	1	6487478	G	A	7.34387	0.461355
	SOVchr5-121432838	5	121432838	A	G	7.3421	0.696491
	SOVchr5-121753669	5	121753669	G	A	7.3421	0.696491
	SOVchr5-123006527	5	123006527	G	A	7.3421	0.696491
	SOVchr5-125304625	5	125304625	C	A	7.3421	0.696491
	SOVchr5-20962270	5	20962270	A	C	7.32776	0.544701
	SOVchr6-41717598	6	41717598	T	A	7.31056	1.05817
	SOVchr5-108915619	5	108915619	G	A	7.30796	0.648409
	SOVchr2-99038016	2	99038016	C	T	7.27913	0.481084
	SOVchr5-120960185	5	120960185	G	A	7.26918	0.583621
	SOVchr5-116191101	5	116191101	G	A	7.26061	0.605857
	SOVchr5-116215968	5	116215968	A	T	7.26061	0.605857
	SOVchr5-116232468	5	116232468	C	A	7.26061	0.605857
	SOVchr5-116237100	5	116237100	A	T	7.26061	0.605857
	SOVchr5-116244949	5	116244949	C	G	7.26061	0.605857
	SOVchr5-116245271	5	116245271	G	T	7.26061	0.605857
	SOVchr5-116296058	5	116296058	C	T	7.26061	0.605857
	SOVchr5-116338864	5	116338864	G	A	7.26061	0.605857
	SOVchr5-116339526	5	116339526	C	T	7.26061	0.605857
	SOVchr5-116479628	5	116479628	T	A	7.26061	0.605857
	SOVchr5-116507713	5	116507713	C	A	7.26061	0.605857
	SOVchr5-116520620	5	116520620	A	T	7.26061	0.605857
	SOVchr5-116523979	5	116523979	G	A	7.26061	0.605857
	SOVchr5-116524249	5	116524249	G	T	7.26061	0.605857
	SOVchr5-116576501	5	116576501	A	G	7.26061	0.605857
	SOVchr5-116655373	5	116655373	A	C	7.26061	0.605857
	SOVchr5-116667712	5	116667712	C	A	7.26061	0.605857
	SOVchr5-116675920	5	116675920	C	T	7.26061	0.605857
	SOVchr5-116678834	5	116678834	C	G	7.26061	0.605857
	SOVchr5-116683636	5	116683636	T	A	7.26061	0.605857
	SOVchr5-116714076	5	116714076	C	T	7.26061	0.605857
	SOVchr5-116721445	5	116721445	C	A	7.26061	0.605857
	SOVchr5-116787410	5	116787410	G	T	7.26061	0.605857
	SOVchr5-116797151	5	116797151	G	T	7.26061	0.605857
	SOVchr5-116813236	5	116813236	T	G	7.26061	0.605857
	SOVchr5-116873889	5	116873889	C	T	7.26061	0.605857
	SOVchr5-117188158	5	117188158	C	T	7.26061	0.605857
	SOVchr5-117284605	5	117284605	A	G	7.26061	0.605857
	SOVchr5-117316463	5	117316463	G	A	7.26061	0.605857
	SOVchr5-117329268	5	117329268	A	T	7.26061	0.605857
	SOVchr5-117579656	5	117579656	A	G	7.26061	0.605857
	SOVchr5-117593526	5	117593526	G	A	7.26061	0.605857
	SOVchr5-117696657	5	117696657	C	T	7.26061	0.605857
	SOVchr5-117760238	5	117760238	T	G	7.26061	0.605857
	SOVchr5-117838344	5	117838344	T	G	7.26061	0.605857
	SOVchr5-117917433	5	117917433	C	G	7.26061	0.605857
	SOVchr5-117919369	5	117919369	G	T	7.26061	0.605857
	SOVchr5-117919692	5	117919692	G	A	7.26061	0.605857
	SOVchr5-117938827	5	117938827	G	T	7.26061	0.605857
	SOVchr5-118014608	5	118014608	G	A	7.26061	0.605857
	SOVchr5-118077698	5	118077698	G	A	7.26061	0.605857
	SOVchr5-118148243	5	118148243	G	A	7.26061	0.605857
	SOVchr5-118254061	5	118254061	C	T	7.26061	0.605857
	SOVchr5-118266397	5	118266397	G	T	7.26061	0.605857
	SOVchr5-118270800	5	118270800	G	T	7.26061	0.605857
	SOVchr5-118277130	5	118277130	C	A	7.26061	0.605857
	SOVchr5-118284713	5	118284713	G	T	7.26061	0.605857
	SOVchr5-118316854	5	118316854	C	T	7.26061	0.605857
	SOVchr5-118769271	5	118769271	G	A	7.26061	0.605857
	SOVchr5-118784528	5	118784528	G	C	7.26061	0.605857
	SOVchr5-118921413	5	118921413	C	T	7.26061	0.605857
	SOVchr5-119106837	5	119106837	G	C	7.26061	0.605857
	SOVchr5-119109973	5	119109973	G	A	7.26061	0.605857
	SOVchr5-119240032	5	119240032	G	A	7.26061	0.605857
	SOVchr5-119374735	5	119374735	A	G	7.26061	0.605857
	SOVchr5-119436882	5	119436882	G	T	7.26061	0.605857
	SOVchr5-119560845	5	119560845	G	C	7.26061	0.605857
	SOVchr5-119568085	5	119568085	G	A	7.26061	0.605857
	SOVchr5-119695561	5	119695561	C	A	7.26061	0.605857
	SOVchr5-119813699	5	119813699	A	C	7.26061	0.605857
	SOVchr5-119996551	5	119996551	T	G	7.26061	0.605857
	SOVchr5-120027367	5	120027367	C	T	7.26061	0.605857
	SOVchr5-120149956	5	120149956	C	T	7.26061	0.605857
	SOVchr5-120154036	5	120154036	C	A	7.26061	0.605857
	SOVchr5-120161041	5	120161041	C	A	7.26061	0.605857
	SOVchr5-120192401	5	120192401	C	T	7.26061	0.605857
	SOVchr5-120501287	5	120501287	T	C	7.26061	0.605857
	SOVchr5-120550486	5	120550486	T	A	7.26061	0.605857
	SOVchr5-120588982	5	120588982	C	A	7.26061	0.605857
	SOVchr5-120650427	5	120650427	G	A	7.26061	0.605857
	SOVchr5-120719619	5	120719619	C	T	7.26061	0.605857
	SOVchr5-120796488	5	120796488	G	A	7.26061	0.605857
	SOVchr5-120875825	5	120875825	T	G	7.26061	0.605857
	SOVchr5-121053272	5	121053272	A	G	7.26061	0.605857
	SOVchr5-121699760	5	121699760	T	C	7.26061	0.605857
	SOVchr5-121878250	5	121878250	T	G	7.26061	0.605857
	SOVchr5-121967058	5	121967058	T	C	7.26061	0.605857
	SOVchr5-122124406	5	122124406	T	C	7.26061	0.605857
	SOVchr5-122126846	5	122126846	C	A	7.26061	0.605857
	SOVchr5-122141369	5	122141369	C	T	7.26061	0.605857
	SOVchr5-122149422	5	122149422	G	A	7.26061	0.605857
	SOVchr5-122171114	5	122171114	T	C	7.26061	0.605857
	SOVchr5-122217900	5	122217900	G	T	7.26061	0.605857
	SOVchr5-122225356	5	122225356	A	G	7.26061	0.605857
	SOVchr5-122506292	5	122506292	C	T	7.26061	0.605857
	SOVchr5-122651409	5	122651409	C	A	7.26061	0.605857
	SOVchr5-122816143	5	122816143	C	A	7.26061	0.605857
	SOVchr5-122878458	5	122878458	A	G	7.26061	0.605857
	SOVchr5-122903175	5	122903175	C	T	7.26061	0.605857
	SOVchr5-122974126	5	122974126	C	T	7.26061	0.605857
	SOVchr5-123181794	5	123181794	A	C	7.26061	0.605857
	SOVchr5-123376963	5	123376963	G	A	7.26061	0.605857
	SOVchr5-123435048	5	123435048	G	T	7.26061	0.605857
	SOVchr5-123454977	5	123454977	A	C	7.26061	0.605857
	SOVchr5-123661710	5	123661710	G	A	7.26061	0.605857
	SOVchr5-123695609	5	123695609	A	T	7.26061	0.605857
	SOVchr5-123726258	5	123726258	G	A	7.26061	0.605857
	SOVchr5-124475727	5	124475727	G	A	7.26061	0.605857
	SOVchr5-124490613	5	124490613	C	A	7.26061	0.605857
	SOVchr5-124490614	5	124490614	C	G	7.26061	0.605857
	SOVchr5-124493860	5	124493860	C	T	7.26061	0.605857
	SOVchr5-124606437	5	124606437	G	A	7.26061	0.605857
	SOVchr5-124713171	5	124713171	C	T	7.26061	0.605857
	SOVchr5-124873177	5	124873177	G	A	7.26061	0.605857
	SOVchr5-124952556	5	124952556	A	G	7.26061	0.605857
	SOVchr5-124988742	5	124988742	T	C	7.26061	0.605857
	SOVchr5-125180820	5	125180820	C	T	7.26061	0.605857
	SOVchr5-125184592	5	125184592	C	T	7.26061	0.605857
	SOVchr1-15047064	1	15047064	G	A	7.24296	0.489832
	SOVchr4-177914469	4	177914469	A	T	7.23992	0.544862
	SOVchr5-30983009	5	30983009	C	A	7.21194	0.61358
	SOVchr5-30984859	5	30984859	G	A	7.21194	0.61358
	SOVchr5-30985802	5	30985802	A	T	7.21194	0.61358
	SOVchr5-30987413	5	30987413	C	T	7.21194	0.61358
	SOVchr5-30992227	5	30992227	C	T	7.21194	0.61358
	SOVchr5-30992503	5	30992503	G	A	7.21194	0.61358
	SOVchr5-30998623	5	30998623	A	G	7.21194	0.61358
	SOVchr5-30998746	5	30998746	G	A	7.21194	0.61358
	SOVchr5-30998787	5	30998787	C	T	7.21194	0.61358
	SOVchr5-30999071	5	30999071	A	C	7.21194	0.61358
	SOVchr5-116333819	5	116333819	C	T	7.21194	0.61358
	SOVchr5-116340643	5	116340643	G	A	7.21194	0.61358
	SOVchr5-116418896	5	116418896	T	A	7.21194	0.61358
	SOVchr5-116490190	5	116490190	C	A	7.21194	0.61358
	SOVchr5-116499355	5	116499355	A	T	7.21194	0.61358
	SOVchr5-116511466	5	116511466	C	A	7.21194	0.61358
	SOVchr5-116574321	5	116574321	C	T	7.21194	0.61358
	SOVchr5-116614815	5	116614815	A	C	7.21194	0.61358
	SOVchr5-116648764	5	116648764	G	A	7.21194	0.61358
	SOVchr5-116769422	5	116769422	C	G	7.21194	0.61358
	SOVchr5-116784113	5	116784113	T	G	7.21194	0.61358
	SOVchr5-116869961	5	116869961	C	T	7.21194	0.61358
	SOVchr5-116883754	5	116883754	G	A	7.21194	0.61358
	SOVchr5-116958056	5	116958056	T	A	7.21194	0.61358
	SOVchr5-117547525	5	117547525	A	T	7.21194	0.61358
	SOVchr5-117603269	5	117603269	C	T	7.21194	0.61358
	SOVchr5-117628199	5	117628199	T	C	7.21194	0.61358
	SOVchr5-117651885	5	117651885	G	A	7.21194	0.61358
	SOVchr5-117703045	5	117703045	G	T	7.21194	0.61358
	SOVchr5-118134771	5	118134771	C	T	7.21194	0.61358
	SOVchr5-118352834	5	118352834	C	T	7.21194	0.61358
	SOVchr5-119090904	5	119090904	G	C	7.21194	0.61358
	SOVchr5-119209834	5	119209834	A	T	7.21194	0.61358
	SOVchr5-119279217	5	119279217	C	A	7.21194	0.61358
	SOVchr5-119672274	5	119672274	G	A	7.21194	0.61358
	SOVchr5-119856493	5	119856493	C	T	7.21194	0.61358
	SOVchr5-119925152	5	119925152	G	C	7.21194	0.61358
	SOVchr5-120672438	5	120672438	G	T	7.21194	0.61358
	SOVchr5-121193577	5	121193577	C	G	7.21194	0.61358
	SOVchr5-121193582	5	121193582	G	T	7.21194	0.61358
	SOVchr5-121229672	5	121229672	A	T	7.21194	0.61358
	SOVchr5-121430634	5	121430634	G	T	7.21194	0.61358
	SOVchr5-121472212	5	121472212	G	A	7.21194	0.61358
	SOVchr5-122051170	5	122051170	T	A	7.21194	0.61358
	SOVchr5-122134386	5	122134386	C	A	7.21194	0.61358
	SOVchr5-122149274	5	122149274	C	T	7.21194	0.61358
	SOVchr5-122229814	5	122229814	G	A	7.21194	0.61358
	SOVchr5-122354900	5	122354900	C	T	7.21194	0.61358
	SOVchr5-122371981	5	122371981	A	G	7.21194	0.61358
	SOVchr5-123524067	5	123524067	G	A	7.21194	0.61358
	SOVchr5-123656600	5	123656600	G	C	7.21194	0.61358
	SOVchr5-123862049	5	123862049	G	T	7.21194	0.61358
	SOVchr5-123952923	5	123952923	G	A	7.21194	0.61358
	SOVchr5-124251382	5	124251382	C	T	7.21194	0.61358
	SOVchr5-124506809	5	124506809	C	T	7.21194	0.61358
	SOVchr5-124709188	5	124709188	C	T	7.21194	0.61358
	SOVchr5-124987498	5	124987498	C	T	7.21194	0.61358
	SOVchr5-125108338	5	125108338	G	A	7.21194	0.61358
	SOVchr5-125364729	5	125364729	C	T	7.21194	0.61358
	SOVchr1-129226955	1	129226955	G	A	7.2075	0.662956
	SOVchr5-66886304	5	66886304	T	C	7.20564	0.564776
	SOVchr5-49924416	5	49924416	G	A	7.19911	0.558122
	SOVchr5-55155959	5	55155959	G	A	7.19911	0.558122
	SOVchr5-115578445	5	115578445	C	A	7.16248	0.561883
	SOVchr5-69055182	5	69055182	G	T	7.14661	0.637336
	SOVchr1-26139949	1	26139949	A	T	7.12916	0.514344
	SOVchr1-79052691	1	79052691	T	C	7.11854	0.45987
	SOVchr1-79052700	1	79052700	T	G	7.11854	0.45987
	SOVchr1-79354477	1	79354477	A	G	7.11854	0.45987
	SOVchr1-79354496	1	79354496	A	C	7.11854	0.45987
	SOVchr5-114266331	5	114266331	G	C	7.09387	0.561908
	SOVchr5-115782055	5	115782055	T	C	7.09387	0.561908
	SOVchr5-56773986	5	56773986	C	A	7.08243	0.572789
	SOVchr5-56779369	5	56779369	T	A	7.08243	0.572789
	SOVchr5-56784099	5	56784099	C	A	7.08243	0.572789
	SOVchr5-56787149	5	56787149	G	A	7.08243	0.572789
	SOVchr5-56792588	5	56792588	C	T	7.08243	0.572789
	SOVchr5-56792687	5	56792687	G	A	7.08243	0.572789
	SOVchr5-56798239	5	56798239	G	A	7.08243	0.572789
	SOVchr5-56799103	5	56799103	C	T	7.08243	0.572789
	SOVchr5-56800587	5	56800587	G	T	7.08243	0.572789
	SOVchr5-56821787	5	56821787	T	G	7.08243	0.572789
	SOVchr5-56821788	5	56821788	C	T	7.08243	0.572789
	SOVchr5-56961305	5	56961305	T	C	7.08243	0.572789
	SOVchr5-57161451	5	57161451	T	A	7.08243	0.572789
	SOVchr5-57471241	5	57471241	T	C	7.08243	0.572789
	SOVchr5-57958052	5	57958052	C	T	7.08243	0.572789
	SOVchr5-28544939	5	28544939	C	A	7.0732	0.553086
	SOVchr5-28546340	5	28546340	A	G	7.0732	0.553086
	SOVchr5-28547449	5	28547449	A	T	7.0732	0.553086
	SOVchr5-28898496	5	28898496	C	G	7.0732	0.553086
	SOVchr5-43246500	5	43246500	A	G	7.0636	0.504605
	SOVchr3-154789212	3	154789212	G	T	7.05802	0.403422
	SOVchr5-43342970	5	43342970	T	C	7.05053	0.508514
	SOVchr1-6355473	1	6355473	G	T	6.97726	0.38638
	SOVchr5-16403663	5	16403663	A	G	6.97032	0.537066
	SOVchr5-26425806	5	26425806	A	G	6.93735	0.672277
	SOVchr4-6580889	4	6580889	T	C	6.92984	0.525449
	SOVchr5-56562966	5	56562966	G	T	6.92984	0.525449
	SOVchr5-56589656	5	56589656	A	T	6.92984	0.525449
	SOVchr5-56593546	5	56593546	G	T	6.92984	0.525449
	SOVchr5-56623704	5	56623704	G	C	6.92984	0.525449
	SOVchr5-56625733	5	56625733	C	A	6.92984	0.525449
	SOVchr5-58474035	5	58474035	G	A	6.92984	0.525449
	SOVchr5-68261756	5	68261756	T	C	6.92984	0.525449
	SOVchr5-68850984	5	68850984	A	G	6.92984	0.525449
	SOVchr5-69933494	5	69933494	C	T	6.92984	0.525449
	SOVchr5-86679979	5	86679979	G	A	6.92984	0.525449
	SOVchr5-116814485	5	116814485	G	T	6.92984	0.525449
	SOVchr6-58860957	6	58860957	G	T	6.908	0.551684
	SOVchr4-6697665	4	6697665	C	T	6.89723	0.555033
	SOVchr5-58048991	5	58048991	A	G	6.86079	0.554653
	SOVchr5-108561754	5	108561754	G	T	6.84338	0.553395
	SOVchr5-108882285	5	108882285	G	A	6.84338	0.553395
	SOVchr5-108884675	5	108884675	T	C	6.84338	0.553395
	SOVchr5-108925678	5	108925678	G	T	6.84338	0.553395
	SOVchr5-116161305	5	116161305	T	G	6.82876	0.605792
	SOVchr5-116161374	5	116161374	A	C	6.82876	0.605792
	SOVchr5-116184800	5	116184800	G	A	6.82876	0.605792
	SOVchr5-116195700	5	116195700	C	G	6.82876	0.605792
	SOVchr5-116196091	5	116196091	G	A	6.82876	0.605792
	SOVchr5-116196499	5	116196499	C	T	6.82876	0.605792
	SOVchr5-116198597	5	116198597	C	T	6.82876	0.605792
	SOVchr5-116198598	5	116198598	T	C	6.82876	0.605792
	SOVchr5-116214904	5	116214904	A	G	6.82876	0.605792
	SOVchr5-116230974	5	116230974	C	T	6.82876	0.605792
	SOVchr5-116235675	5	116235675	G	T	6.82876	0.605792
	SOVchr5-116238471	5	116238471	G	A	6.82876	0.605792
	SOVchr5-116241016	5	116241016	G	A	6.82876	0.605792
	SOVchr5-116243019	5	116243019	C	A	6.82876	0.605792
	SOVchr5-116292417	5	116292417	A	G	6.82876	0.605792
	SOVchr5-116294829	5	116294829	C	G	6.82876	0.605792
	SOVchr5-116304355	5	116304355	G	A	6.82876	0.605792
	SOVchr5-116310551	5	116310551	G	A	6.82876	0.605792
	SOVchr5-116310746	5	116310746	G	A	6.82876	0.605792
	SOVchr5-116322153	5	116322153	A	G	6.82876	0.605792
	SOVchr5-116344110	5	116344110	G	A	6.82876	0.605792
	SOVchr5-116346405	5	116346405	G	T	6.82876	0.605792
	SOVchr5-116351165	5	116351165	G	A	6.82876	0.605792
	SOVchr5-116386922	5	116386922	G	T	6.82876	0.605792
	SOVchr5-116403683	5	116403683	A	C	6.82876	0.605792
	SOVchr5-116431688	5	116431688	T	A	6.82876	0.605792
	SOVchr5-116439766	5	116439766	G	A	6.82876	0.605792
	SOVchr5-116441817	5	116441817	G	A	6.82876	0.605792
	SOVchr5-116443516	5	116443516	C	T	6.82876	0.605792
	SOVchr5-116444737	5	116444737	G	C	6.82876	0.605792
	SOVchr5-116468768	5	116468768	G	T	6.82876	0.605792
	SOVchr5-116479183	5	116479183	G	A	6.82876	0.605792
	SOVchr5-116482455	5	116482455	A	G	6.82876	0.605792
	SOVchr5-116486608	5	116486608	G	C	6.82876	0.605792
	SOVchr5-116491084	5	116491084	C	A	6.82876	0.605792
	SOVchr5-116495206	5	116495206	G	A	6.82876	0.605792
	SOVchr5-116500045	5	116500045	G	T	6.82876	0.605792
	SOVchr5-116504774	5	116504774	C	A	6.82876	0.605792
	SOVchr5-116505205	5	116505205	C	A	6.82876	0.605792
	SOVchr5-116505876	5	116505876	G	A	6.82876	0.605792
	SOVchr5-116507205	5	116507205	G	A	6.82876	0.605792
	SOVchr5-116514474	5	116514474	C	G	6.82876	0.605792
	SOVchr5-116517575	5	116517575	G	A	6.82876	0.605792
	SOVchr5-116520254	5	116520254	G	A	6.82876	0.605792
	SOVchr5-116521310	5	116521310	C	T	6.82876	0.605792
	SOVchr5-116523340	5	116523340	G	A	6.82876	0.605792
	SOVchr5-116533758	5	116533758	G	T	6.82876	0.605792
	SOVchr5-116535752	5	116535752	T	C	6.82876	0.605792
	SOVchr5-116571177	5	116571177	A	G	6.82876	0.605792
	SOVchr5-116572144	5	116572144	G	A	6.82876	0.605792
	SOVchr5-116572249	5	116572249	C	T	6.82876	0.605792
	SOVchr5-116573317	5	116573317	G	A	6.82876	0.605792
	SOVchr5-116575757	5	116575757	G	T	6.82876	0.605792
	SOVchr5-116577541	5	116577541	A	G	6.82876	0.605792
	SOVchr5-116578759	5	116578759	G	A	6.82876	0.605792
	SOVchr5-116580712	5	116580712	G	T	6.82876	0.605792
	SOVchr5-116581578	5	116581578	T	C	6.82876	0.605792
	SOVchr5-116581799	5	116581799	T	A	6.82876	0.605792
	SOVchr5-116582284	5	116582284	G	A	6.82876	0.605792
	SOVchr5-116583866	5	116583866	G	C	6.82876	0.605792
	SOVchr5-116584525	5	116584525	T	G	6.82876	0.605792
	SOVchr5-116585281	5	116585281	G	A	6.82876	0.605792
	SOVchr5-116586357	5	116586357	A	T	6.82876	0.605792
	SOVchr5-116587834	5	116587834	C	T	6.82876	0.605792
	SOVchr5-116595549	5	116595549	C	T	6.82876	0.605792
	SOVchr5-116596562	5	116596562	C	G	6.82876	0.605792
	SOVchr5-116596618	5	116596618	C	T	6.82876	0.605792
	SOVchr5-116596662	5	116596662	G	A	6.82876	0.605792
	SOVchr5-116601589	5	116601589	C	T	6.82876	0.605792
	SOVchr5-116602158	5	116602158	A	T	6.82876	0.605792
	SOVchr5-116603485	5	116603485	C	T	6.82876	0.605792
	SOVchr5-116609619	5	116609619	T	C	6.82876	0.605792
	SOVchr5-116610852	5	116610852	G	A	6.82876	0.605792
	SOVchr5-116611407	5	116611407	A	G	6.82876	0.605792
	SOVchr5-116615072	5	116615072	A	T	6.82876	0.605792
	SOVchr5-116616089	5	116616089	G	A	6.82876	0.605792
	SOVchr5-116624247	5	116624247	T	A	6.82876	0.605792
	SOVchr5-116624667	5	116624667	C	T	6.82876	0.605792
	SOVchr5-116648425	5	116648425	A	G	6.82876	0.605792
	SOVchr5-116650729	5	116650729	C	T	6.82876	0.605792
	SOVchr5-116654202	5	116654202	A	T	6.82876	0.605792
	SOVchr5-116654581	5	116654581	C	T	6.82876	0.605792
	SOVchr5-116660277	5	116660277	G	A	6.82876	0.605792
	SOVchr5-116661676	5	116661676	C	A	6.82876	0.605792
	SOVchr5-116662462	5	116662462	C	T	6.82876	0.605792
	SOVchr5-116663336	5	116663336	G	T	6.82876	0.605792
	SOVchr5-116668830	5	116668830	A	G	6.82876	0.605792
	SOVchr5-116669149	5	116669149	G	T	6.82876	0.605792
	SOVchr5-116671058	5	116671058	T	C	6.82876	0.605792
	SOVchr5-116671443	5	116671443	T	G	6.82876	0.605792
	SOVchr5-116673522	5	116673522	G	C	6.82876	0.605792
	SOVchr5-116679792	5	116679792	G	A	6.82876	0.605792
	SOVchr5-116682757	5	116682757	C	T	6.82876	0.605792
	SOVchr5-116689047	5	116689047	G	A	6.82876	0.605792
	SOVchr5-116691031	5	116691031	G	T	6.82876	0.605792
	SOVchr5-116703994	5	116703994	G	A	6.82876	0.605792
	SOVchr5-116708787	5	116708787	C	T	6.82876	0.605792
	SOVchr5-116710675	5	116710675	G	T	6.82876	0.605792
	SOVchr5-116711020	5	116711020	G	A	6.82876	0.605792
	SOVchr5-116714029	5	116714029	C	T	6.82876	0.605792
	SOVchr5-116715039	5	116715039	G	A	6.82876	0.605792
	SOVchr5-116715362	5	116715362	A	G	6.82876	0.605792
	SOVchr5-116715431	5	116715431	A	G	6.82876	0.605792
	SOVchr5-116715833	5	116715833	G	A	6.82876	0.605792
	SOVchr5-116723187	5	116723187	G	T	6.82876	0.605792
	SOVchr5-116726059	5	116726059	T	A	6.82876	0.605792
	SOVchr5-116748072	5	116748072	G	C	6.82876	0.605792
	SOVchr5-116749006	5	116749006	C	G	6.82876	0.605792
	SOVchr5-116756046	5	116756046	T	A	6.82876	0.605792
	SOVchr5-116756702	5	116756702	A	T	6.82876	0.605792
	SOVchr5-116759586	5	116759586	G	A	6.82876	0.605792
	SOVchr5-116760059	5	116760059	T	A	6.82876	0.605792
	SOVchr5-116767348	5	116767348	A	G	6.82876	0.605792
	SOVchr5-116770595	5	116770595	G	A	6.82876	0.605792
	SOVchr5-116770796	5	116770796	G	A	6.82876	0.605792
	SOVchr5-116771022	5	116771022	G	A	6.82876	0.605792
	SOVchr5-116771202	5	116771202	T	C	6.82876	0.605792
	SOVchr5-116771203	5	116771203	G	T	6.82876	0.605792
	SOVchr5-116771510	5	116771510	T	A	6.82876	0.605792
	SOVchr5-116771608	5	116771608	C	T	6.82876	0.605792
	SOVchr5-116771914	5	116771914	C	A	6.82876	0.605792
	SOVchr5-116773478	5	116773478	T	A	6.82876	0.605792
	SOVchr5-116774970	5	116774970	G	C	6.82876	0.605792
	SOVchr5-116781589	5	116781589	G	A	6.82876	0.605792
	SOVchr5-116782732	5	116782732	G	T	6.82876	0.605792
	SOVchr5-116784551	5	116784551	G	A	6.82876	0.605792
	SOVchr5-116785947	5	116785947	T	C	6.82876	0.605792
	SOVchr5-116790100	5	116790100	C	A	6.82876	0.605792
	SOVchr5-116790455	5	116790455	G	A	6.82876	0.605792
	SOVchr5-116790537	5	116790537	A	T	6.82876	0.605792
	SOVchr5-116791027	5	116791027	C	A	6.82876	0.605792
	SOVchr5-116791806	5	116791806	T	C	6.82876	0.605792
	SOVchr5-116793255	5	116793255	A	T	6.82876	0.605792
	SOVchr5-116793433	5	116793433	C	T	6.82876	0.605792
	SOVchr5-116798437	5	116798437	G	A	6.82876	0.605792
	SOVchr5-116798446	5	116798446	G	T	6.82876	0.605792
	SOVchr5-116799370	5	116799370	A	C	6.82876	0.605792
	SOVchr5-116802002	5	116802002	G	A	6.82876	0.605792
	SOVchr5-116812536	5	116812536	C	T	6.82876	0.605792
	SOVchr5-116826677	5	116826677	A	T	6.82876	0.605792
	SOVchr5-116826700	5	116826700	G	T	6.82876	0.605792
	SOVchr5-116833278	5	116833278	T	A	6.82876	0.605792
	SOVchr5-116833610	5	116833610	G	A	6.82876	0.605792
	SOVchr5-116871604	5	116871604	G	A	6.82876	0.605792
	SOVchr5-116872224	5	116872224	A	G	6.82876	0.605792
	SOVchr5-116873474	5	116873474	C	T	6.82876	0.605792
	SOVchr5-116874478	5	116874478	A	T	6.82876	0.605792
	SOVchr5-116874499	5	116874499	C	T	6.82876	0.605792
	SOVchr5-116879782	5	116879782	G	A	6.82876	0.605792
	SOVchr5-116880217	5	116880217	G	A	6.82876	0.605792
	SOVchr5-116884324	5	116884324	C	A	6.82876	0.605792
	SOVchr5-116886682	5	116886682	G	T	6.82876	0.605792
	SOVchr5-116889455	5	116889455	G	A	6.82876	0.605792
	SOVchr5-116891275	5	116891275	C	A	6.82876	0.605792
	SOVchr5-116892271	5	116892271	T	C	6.82876	0.605792
	SOVchr5-116892416	5	116892416	G	A	6.82876	0.605792
	SOVchr5-116934723	5	116934723	T	C	6.82876	0.605792
	SOVchr5-116941618	5	116941618	G	A	6.82876	0.605792
	SOVchr5-116964229	5	116964229	T	C	6.82876	0.605792
	SOVchr5-117003978	5	117003978	T	C	6.82876	0.605792
	SOVchr5-117011142	5	117011142	G	A	6.82876	0.605792
	SOVchr5-117138749	5	117138749	T	A	6.82876	0.605792
	SOVchr5-117138751	5	117138751	G	T	6.82876	0.605792
	SOVchr5-117162658	5	117162658	G	T	6.82876	0.605792
	SOVchr5-117186419	5	117186419	G	A	6.82876	0.605792
	SOVchr5-117187518	5	117187518	T	C	6.82876	0.605792
	SOVchr5-117200555	5	117200555	G	T	6.82876	0.605792
	SOVchr5-117215186	5	117215186	C	T	6.82876	0.605792
	SOVchr5-117228605	5	117228605	T	C	6.82876	0.605792
	SOVchr5-117233845	5	117233845	G	T	6.82876	0.605792
	SOVchr5-117257681	5	117257681	C	A	6.82876	0.605792
	SOVchr5-117259002	5	117259002	C	A	6.82876	0.605792
	SOVchr5-117280759	5	117280759	C	A	6.82876	0.605792
	SOVchr5-117307459	5	117307459	A	C	6.82876	0.605792
	SOVchr5-117329052	5	117329052	C	T	6.82876	0.605792
	SOVchr5-117336614	5	117336614	T	G	6.82876	0.605792
	SOVchr5-117342622	5	117342622	C	A	6.82876	0.605792
	SOVchr5-117346151	5	117346151	C	T	6.82876	0.605792
	SOVchr5-117370506	5	117370506	G	A	6.82876	0.605792
	SOVchr5-117388169	5	117388169	C	T	6.82876	0.605792
	SOVchr5-117414205	5	117414205	C	T	6.82876	0.605792
	SOVchr5-117419411	5	117419411	G	A	6.82876	0.605792
	SOVchr5-117426327	5	117426327	G	A	6.82876	0.605792
	SOVchr5-117427814	5	117427814	G	A	6.82876	0.605792
	SOVchr5-117461401	5	117461401	C	T	6.82876	0.605792
	SOVchr5-117465387	5	117465387	C	T	6.82876	0.605792
	SOVchr5-117540899	5	117540899	C	T	6.82876	0.605792
	SOVchr5-117545198	5	117545198	C	T	6.82876	0.605792
	SOVchr5-117563581	5	117563581	C	A	6.82876	0.605792
	SOVchr5-117575870	5	117575870	G	T	6.82876	0.605792
	SOVchr5-117578291	5	117578291	T	A	6.82876	0.605792
	SOVchr5-117580017	5	117580017	G	A	6.82876	0.605792
	SOVchr5-117583926	5	117583926	G	A	6.82876	0.605792
	SOVchr5-117584418	5	117584418	T	G	6.82876	0.605792
	SOVchr5-117586662	5	117586662	G	T	6.82876	0.605792
	SOVchr5-117595955	5	117595955	T	C	6.82876	0.605792
	SOVchr5-117602691	5	117602691	T	C	6.82876	0.605792
	SOVchr5-117616239	5	117616239	C	T	6.82876	0.605792
	SOVchr5-117649976	5	117649976	G	T	6.82876	0.605792
	SOVchr5-117655208	5	117655208	G	T	6.82876	0.605792
	SOVchr5-117659358	5	117659358	G	C	6.82876	0.605792
	SOVchr5-117704683	5	117704683	T	A	6.82876	0.605792
	SOVchr5-117740116	5	117740116	G	A	6.82876	0.605792
	SOVchr5-117751667	5	117751667	A	C	6.82876	0.605792
	SOVchr5-117753487	5	117753487	C	G	6.82876	0.605792
	SOVchr5-117779897	5	117779897	C	T	6.82876	0.605792
	SOVchr5-117780311	5	117780311	G	A	6.82876	0.605792
	SOVchr5-117783337	5	117783337	C	A	6.82876	0.605792
	SOVchr5-117800639	5	117800639	C	T	6.82876	0.605792
	SOVchr5-117801771	5	117801771	C	T	6.82876	0.605792
	SOVchr5-117810368	5	117810368	G	A	6.82876	0.605792
	SOVchr5-117814398	5	117814398	T	A	6.82876	0.605792
	SOVchr5-117821053	5	117821053	G	T	6.82876	0.605792
	SOVchr5-117827295	5	117827295	G	A	6.82876	0.605792
	SOVchr5-117834998	5	117834998	C	T	6.82876	0.605792
	SOVchr5-117843050	5	117843050	G	T	6.82876	0.605792
	SOVchr5-117868408	5	117868408	G	A	6.82876	0.605792
	SOVchr5-117870817	5	117870817	T	A	6.82876	0.605792
	SOVchr5-117871039	5	117871039	C	G	6.82876	0.605792
	SOVchr5-117884566	5	117884566	G	A	6.82876	0.605792
	SOVchr5-117885627	5	117885627	A	G	6.82876	0.605792
	SOVchr5-117898987	5	117898987	T	C	6.82876	0.605792
	SOVchr5-117904293	5	117904293	C	A	6.82876	0.605792
	SOVchr5-117913887	5	117913887	G	T	6.82876	0.605792
	SOVchr5-117935084	5	117935084	C	G	6.82876	0.605792
	SOVchr5-117982685	5	117982685	A	T	6.82876	0.605792
	SOVchr5-117984763	5	117984763	A	G	6.82876	0.605792
	SOVchr5-117997143	5	117997143	T	A	6.82876	0.605792
	SOVchr5-118004170	5	118004170	T	G	6.82876	0.605792
	SOVchr5-118010741	5	118010741	G	A	6.82876	0.605792
	SOVchr5-118011463	5	118011463	G	A	6.82876	0.605792
	SOVchr5-118031246	5	118031246	C	T	6.82876	0.605792
	SOVchr5-118043112	5	118043112	C	A	6.82876	0.605792
	SOVchr5-118045529	5	118045529	G	A	6.82876	0.605792
	SOVchr5-118050773	5	118050773	G	A	6.82876	0.605792
	SOVchr5-118050774	5	118050774	A	C	6.82876	0.605792
	SOVchr5-118069073	5	118069073	T	A	6.82876	0.605792
	SOVchr5-118070342	5	118070342	G	A	6.82876	0.605792
	SOVchr5-118076012	5	118076012	G	T	6.82876	0.605792
	SOVchr5-118084930	5	118084930	T	C	6.82876	0.605792
	SOVchr5-118100858	5	118100858	T	C	6.82876	0.605792
	SOVchr5-118156508	5	118156508	T	C	6.82876	0.605792
	SOVchr5-118169701	5	118169701	C	T	6.82876	0.605792
	SOVchr5-118205418	5	118205418	G	A	6.82876	0.605792
	SOVchr5-118225297	5	118225297	G	A	6.82876	0.605792
	SOVchr5-118244856	5	118244856	A	G	6.82876	0.605792
	SOVchr5-118246598	5	118246598	T	G	6.82876	0.605792
	SOVchr5-118251871	5	118251871	C	A	6.82876	0.605792
	SOVchr5-118262283	5	118262283	A	G	6.82876	0.605792
	SOVchr5-118283955	5	118283955	C	T	6.82876	0.605792
	SOVchr5-118296924	5	118296924	T	G	6.82876	0.605792
	SOVchr5-118332859	5	118332859	G	A	6.82876	0.605792
	SOVchr5-118339922	5	118339922	G	T	6.82876	0.605792
	SOVchr5-118361800	5	118361800	G	A	6.82876	0.605792
	SOVchr5-118385292	5	118385292	G	A	6.82876	0.605792
	SOVchr5-118407981	5	118407981	C	T	6.82876	0.605792
	SOVchr5-118410472	5	118410472	G	T	6.82876	0.605792
	SOVchr5-118417788	5	118417788	G	A	6.82876	0.605792
	SOVchr5-118453500	5	118453500	C	T	6.82876	0.605792
	SOVchr5-118487378	5	118487378	G	A	6.82876	0.605792
	SOVchr5-118500275	5	118500275	G	A	6.82876	0.605792
	SOVchr5-118516476	5	118516476	C	T	6.82876	0.605792
	SOVchr5-118527169	5	118527169	G	A	6.82876	0.605792
	SOVchr5-118585790	5	118585790	G	A	6.82876	0.605792
	SOVchr5-118593638	5	118593638	T	C	6.82876	0.605792
	SOVchr5-118721540	5	118721540	C	A	6.82876	0.605792
	SOVchr5-118724249	5	118724249	C	T	6.82876	0.605792
	SOVchr5-118749449	5	118749449	C	A	6.82876	0.605792
	SOVchr5-118749917	5	118749917	T	C	6.82876	0.605792
	SOVchr5-118751047	5	118751047	C	G	6.82876	0.605792
	SOVchr5-118767356	5	118767356	G	C	6.82876	0.605792
	SOVchr5-118776380	5	118776380	A	T	6.82876	0.605792
	SOVchr5-118781003	5	118781003	G	A	6.82876	0.605792
	SOVchr5-118800544	5	118800544	C	G	6.82876	0.605792
	SOVchr5-118822462	5	118822462	C	T	6.82876	0.605792
	SOVchr5-118824564	5	118824564	C	T	6.82876	0.605792
	SOVchr5-118860699	5	118860699	G	T	6.82876	0.605792
	SOVchr5-118886453	5	118886453	A	C	6.82876	0.605792
	SOVchr5-118920287	5	118920287	G	A	6.82876	0.605792
	SOVchr5-118929621	5	118929621	T	C	6.82876	0.605792
	SOVchr5-118965308	5	118965308	C	T	6.82876	0.605792
	SOVchr5-118966463	5	118966463	G	A	6.82876	0.605792
	SOVchr5-118987377	5	118987377	G	T	6.82876	0.605792
	SOVchr5-118991170	5	118991170	G	A	6.82876	0.605792
	SOVchr5-119103266	5	119103266	C	T	6.82876	0.605792
	SOVchr5-119103322	5	119103322	A	T	6.82876	0.605792
	SOVchr5-119205454	5	119205454	C	A	6.82876	0.605792
	SOVchr5-119210415	5	119210415	A	C	6.82876	0.605792
	SOVchr5-119226895	5	119226895	C	A	6.82876	0.605792
	SOVchr5-119238719	5	119238719	G	T	6.82876	0.605792
	SOVchr5-119242493	5	119242493	A	G	6.82876	0.605792
	SOVchr5-119248784	5	119248784	C	A	6.82876	0.605792
	SOVchr5-119263020	5	119263020	G	A	6.82876	0.605792
	SOVchr5-119263495	5	119263495	C	A	6.82876	0.605792
	SOVchr5-119271923	5	119271923	G	A	6.82876	0.605792
	SOVchr5-119296180	5	119296180	G	C	6.82876	0.605792
	SOVchr5-119343584	5	119343584	T	A	6.82876	0.605792
	SOVchr5-119365128	5	119365128	C	T	6.82876	0.605792
	SOVchr5-119395633	5	119395633	G	A	6.82876	0.605792
	SOVchr5-119395634	5	119395634	T	A	6.82876	0.605792
	SOVchr5-119424434	5	119424434	A	G	6.82876	0.605792
	SOVchr5-119442960	5	119442960	A	C	6.82876	0.605792
	SOVchr5-119536419	5	119536419	A	C	6.82876	0.605792
	SOVchr5-119537124	5	119537124	T	A	6.82876	0.605792
	SOVchr5-119547580	5	119547580	G	A	6.82876	0.605792
	SOVchr5-119597259	5	119597259	C	T	6.82876	0.605792
	SOVchr5-119606565	5	119606565	C	G	6.82876	0.605792
	SOVchr5-119611106	5	119611106	C	A	6.82876	0.605792
	SOVchr5-119621710	5	119621710	C	T	6.82876	0.605792
	SOVchr5-119673855	5	119673855	A	G	6.82876	0.605792
	SOVchr5-119693812	5	119693812	G	A	6.82876	0.605792
	SOVchr5-119694127	5	119694127	C	T	6.82876	0.605792
	SOVchr5-119698661	5	119698661	A	T	6.82876	0.605792
	SOVchr5-119718175	5	119718175	C	G	6.82876	0.605792
	SOVchr5-119749614	5	119749614	G	T	6.82876	0.605792
	SOVchr5-119752868	5	119752868	C	G	6.82876	0.605792
	SOVchr5-119789776	5	119789776	C	A	6.82876	0.605792
	SOVchr5-119793749	5	119793749	G	T	6.82876	0.605792
	SOVchr5-119794701	5	119794701	G	A	6.82876	0.605792
	SOVchr5-119797887	5	119797887	C	T	6.82876	0.605792
	SOVchr5-119797888	5	119797888	G	T	6.82876	0.605792
	SOVchr5-119799321	5	119799321	G	T	6.82876	0.605792
	SOVchr5-119807167	5	119807167	G	T	6.82876	0.605792
	SOVchr5-119817053	5	119817053	G	C	6.82876	0.605792
	SOVchr5-119943087	5	119943087	C	T	6.82876	0.605792
	SOVchr5-119982286	5	119982286	C	T	6.82876	0.605792
	SOVchr5-119987279	5	119987279	A	T	6.82876	0.605792
	SOVchr5-119987343	5	119987343	G	A	6.82876	0.605792
	SOVchr5-119995212	5	119995212	C	G	6.82876	0.605792
	SOVchr5-120028794	5	120028794	C	T	6.82876	0.605792
	SOVchr5-120028798	5	120028798	G	T	6.82876	0.605792
	SOVchr5-120047391	5	120047391	A	C	6.82876	0.605792
	SOVchr5-120047398	5	120047398	G	A	6.82876	0.605792
	SOVchr5-120069016	5	120069016	C	T	6.82876	0.605792
	SOVchr5-120069018	5	120069018	C	T	6.82876	0.605792
	SOVchr5-120081953	5	120081953	C	G	6.82876	0.605792
	SOVchr5-120084062	5	120084062	A	G	6.82876	0.605792
	SOVchr5-120131700	5	120131700	G	C	6.82876	0.605792
	SOVchr5-120188136	5	120188136	T	G	6.82876	0.605792
	SOVchr5-120194415	5	120194415	G	A	6.82876	0.605792
	SOVchr5-120195500	5	120195500	G	T	6.82876	0.605792
	SOVchr5-120209186	5	120209186	C	A	6.82876	0.605792
	SOVchr5-120214055	5	120214055	C	G	6.82876	0.605792
	SOVchr5-120230860	5	120230860	C	T	6.82876	0.605792
	SOVchr5-120231886	5	120231886	A	G	6.82876	0.605792
	SOVchr5-120318458	5	120318458	G	A	6.82876	0.605792
	SOVchr5-120379719	5	120379719	G	A	6.82876	0.605792
	SOVchr5-120437184	5	120437184	C	T	6.82876	0.605792
	SOVchr5-120490573	5	120490573	G	A	6.82876	0.605792
	SOVchr5-120502345	5	120502345	G	A	6.82876	0.605792
	SOVchr5-120511238	5	120511238	G	C	6.82876	0.605792
	SOVchr5-120527400	5	120527400	A	G	6.82876	0.605792
	SOVchr5-120540585	5	120540585	C	T	6.82876	0.605792
	SOVchr5-120541995	5	120541995	T	A	6.82876	0.605792
	SOVchr5-120542955	5	120542955	A	G	6.82876	0.605792
	SOVchr5-120567641	5	120567641	G	C	6.82876	0.605792
	SOVchr5-120587034	5	120587034	T	A	6.82876	0.605792
	SOVchr5-120587411	5	120587411	A	T	6.82876	0.605792
	SOVchr5-120606073	5	120606073	G	A	6.82876	0.605792
	SOVchr5-120659082	5	120659082	C	G	6.82876	0.605792
	SOVchr5-120665596	5	120665596	C	G	6.82876	0.605792
	SOVchr5-120668034	5	120668034	C	T	6.82876	0.605792
	SOVchr5-120678463	5	120678463	C	T	6.82876	0.605792
	SOVchr5-120714255	5	120714255	G	A	6.82876	0.605792
	SOVchr5-120799863	5	120799863	C	T	6.82876	0.605792
	SOVchr5-120805292	5	120805292	G	A	6.82876	0.605792
	SOVchr5-120810172	5	120810172	C	A	6.82876	0.605792
	SOVchr5-120815435	5	120815435	A	T	6.82876	0.605792
	SOVchr5-120829814	5	120829814	C	T	6.82876	0.605792
	SOVchr5-120850583	5	120850583	A	G	6.82876	0.605792
	SOVchr5-120902227	5	120902227	G	A	6.82876	0.605792
	SOVchr5-120913427	5	120913427	C	T	6.82876	0.605792
	SOVchr5-120926463	5	120926463	G	A	6.82876	0.605792
	SOVchr5-120971450	5	120971450	A	G	6.82876	0.605792
	SOVchr5-120984301	5	120984301	G	A	6.82876	0.605792
	SOVchr5-120985754	5	120985754	T	A	6.82876	0.605792
	SOVchr5-120988211	5	120988211	T	A	6.82876	0.605792
	SOVchr5-121027707	5	121027707	A	C	6.82876	0.605792
	SOVchr5-121077886	5	121077886	C	G	6.82876	0.605792
	SOVchr5-121201711	5	121201711	C	A	6.82876	0.605792
	SOVchr5-121218859	5	121218859	G	A	6.82876	0.605792
	SOVchr5-121224251	5	121224251	T	C	6.82876	0.605792
	SOVchr5-121227575	5	121227575	T	C	6.82876	0.605792
	SOVchr5-121251403	5	121251403	A	T	6.82876	0.605792
	SOVchr5-121271541	5	121271541	G	T	6.82876	0.605792
	SOVchr5-121283498	5	121283498	A	G	6.82876	0.605792
	SOVchr5-121308045	5	121308045	C	T	6.82876	0.605792
	SOVchr5-121331801	5	121331801	G	A	6.82876	0.605792
	SOVchr5-121334989	5	121334989	G	C	6.82876	0.605792
	SOVchr5-121349167	5	121349167	G	C	6.82876	0.605792
	SOVchr5-121353660	5	121353660	G	A	6.82876	0.605792
	SOVchr5-121369051	5	121369051	G	T	6.82876	0.605792
	SOVchr5-121380528	5	121380528	T	G	6.82876	0.605792
	SOVchr5-121385179	5	121385179	A	G	6.82876	0.605792
	SOVchr5-121477077	5	121477077	G	C	6.82876	0.605792
	SOVchr5-121506847	5	121506847	G	A	6.82876	0.605792
	SOVchr5-121523229	5	121523229	G	A	6.82876	0.605792
	SOVchr5-121541744	5	121541744	G	T	6.82876	0.605792
	SOVchr5-121544651	5	121544651	A	G	6.82876	0.605792
	SOVchr5-121561215	5	121561215	G	A	6.82876	0.605792
	SOVchr5-121616482	5	121616482	A	G	6.82876	0.605792
	SOVchr5-121667067	5	121667067	C	A	6.82876	0.605792
	SOVchr5-121692873	5	121692873	T	C	6.82876	0.605792
	SOVchr5-121737041	5	121737041	G	T	6.82876	0.605792
	SOVchr5-121763353	5	121763353	C	G	6.82876	0.605792
	SOVchr5-121827710	5	121827710	C	T	6.82876	0.605792
	SOVchr5-121890171	5	121890171	G	A	6.82876	0.605792
	SOVchr5-121892941	5	121892941	C	A	6.82876	0.605792
	SOVchr5-121914927	5	121914927	G	A	6.82876	0.605792
	SOVchr5-122024414	5	122024414	C	T	6.82876	0.605792
	SOVchr5-122026917	5	122026917	G	A	6.82876	0.605792
	SOVchr5-122042956	5	122042956	G	A	6.82876	0.605792
	SOVchr5-122048589	5	122048589	C	T	6.82876	0.605792
	SOVchr5-122054164	5	122054164	C	T	6.82876	0.605792
	SOVchr5-122063921	5	122063921	T	G	6.82876	0.605792
	SOVchr5-122222746	5	122222746	A	G	6.82876	0.605792
	SOVchr5-122298781	5	122298781	T	C	6.82876	0.605792
	SOVchr5-122304368	5	122304368	T	A	6.82876	0.605792
	SOVchr5-122332535	5	122332535	A	T	6.82876	0.605792
	SOVchr5-122336092	5	122336092	T	A	6.82876	0.605792
	SOVchr5-122374733	5	122374733	T	A	6.82876	0.605792
	SOVchr5-122396353	5	122396353	C	T	6.82876	0.605792
	SOVchr5-122400218	5	122400218	A	C	6.82876	0.605792
	SOVchr5-122401173	5	122401173	C	T	6.82876	0.605792
	SOVchr5-122430441	5	122430441	G	T	6.82876	0.605792
	SOVchr5-122430443	5	122430443	C	G	6.82876	0.605792
	SOVchr5-122509742	5	122509742	C	T	6.82876	0.605792
	SOVchr5-122520513	5	122520513	T	A	6.82876	0.605792
	SOVchr5-122527464	5	122527464	T	A	6.82876	0.605792
	SOVchr5-122540188	5	122540188	G	A	6.82876	0.605792
	SOVchr5-122584435	5	122584435	A	C	6.82876	0.605792
	SOVchr5-122719621	5	122719621	T	C	6.82876	0.605792
	SOVchr5-122722672	5	122722672	T	G	6.82876	0.605792
	SOVchr5-122755442	5	122755442	A	T	6.82876	0.605792
	SOVchr5-122758788	5	122758788	C	T	6.82876	0.605792
	SOVchr5-122760960	5	122760960	G	A	6.82876	0.605792
	SOVchr5-122768818	5	122768818	T	G	6.82876	0.605792
	SOVchr5-122786262	5	122786262	A	T	6.82876	0.605792
	SOVchr5-122848018	5	122848018	A	G	6.82876	0.605792
	SOVchr5-122851539	5	122851539	G	A	6.82876	0.605792
	SOVchr5-122857493	5	122857493	A	G	6.82876	0.605792
	SOVchr5-122873621	5	122873621	C	T	6.82876	0.605792
	SOVchr5-122903918	5	122903918	T	G	6.82876	0.605792
	SOVchr5-122909979	5	122909979	G	A	6.82876	0.605792
	SOVchr5-122925813	5	122925813	G	A	6.82876	0.605792
	SOVchr5-122933834	5	122933834	C	T	6.82876	0.605792
	SOVchr5-122966861	5	122966861	G	A	6.82876	0.605792
	SOVchr5-122978032	5	122978032	T	G	6.82876	0.605792
	SOVchr5-123002785	5	123002785	T	A	6.82876	0.605792
	SOVchr5-123008213	5	123008213	G	T	6.82876	0.605792
	SOVchr5-123012031	5	123012031	G	A	6.82876	0.605792
	SOVchr5-123029072	5	123029072	G	A	6.82876	0.605792
	SOVchr5-123175565	5	123175565	C	T	6.82876	0.605792
	SOVchr5-123176667	5	123176667	C	T	6.82876	0.605792
	SOVchr5-123270430	5	123270430	G	A	6.82876	0.605792
	SOVchr5-123310991	5	123310991	G	T	6.82876	0.605792
	SOVchr5-123315999	5	123315999	T	A	6.82876	0.605792
	SOVchr5-123368093	5	123368093	C	G	6.82876	0.605792
	SOVchr5-123420043	5	123420043	G	T	6.82876	0.605792
	SOVchr5-123472340	5	123472340	G	T	6.82876	0.605792
	SOVchr5-123529852	5	123529852	C	T	6.82876	0.605792
	SOVchr5-123552255	5	123552255	G	A	6.82876	0.605792
	SOVchr5-123596613	5	123596613	C	T	6.82876	0.605792
	SOVchr5-123726356	5	123726356	C	G	6.82876	0.605792
	SOVchr5-123727623	5	123727623	G	A	6.82876	0.605792
	SOVchr5-123738316	5	123738316	A	T	6.82876	0.605792
	SOVchr5-123778105	5	123778105	A	G	6.82876	0.605792
	SOVchr5-123811072	5	123811072	G	A	6.82876	0.605792
	SOVchr5-123864758	5	123864758	G	T	6.82876	0.605792
	SOVchr5-123888304	5	123888304	G	T	6.82876	0.605792
	SOVchr5-123889109	5	123889109	T	A	6.82876	0.605792
	SOVchr5-123891463	5	123891463	C	T	6.82876	0.605792
	SOVchr5-123987475	5	123987475	A	T	6.82876	0.605792
	SOVchr5-124159363	5	124159363	G	A	6.82876	0.605792
	SOVchr5-124242948	5	124242948	G	C	6.82876	0.605792
	SOVchr5-124253117	5	124253117	C	T	6.82876	0.605792
	SOVchr5-124271343	5	124271343	G	T	6.82876	0.605792
	SOVchr5-124273779	5	124273779	C	T	6.82876	0.605792
	SOVchr5-124316168	5	124316168	T	G	6.82876	0.605792
	SOVchr5-124345063	5	124345063	G	A	6.82876	0.605792
	SOVchr5-124410552	5	124410552	A	T	6.82876	0.605792
	SOVchr5-124437528	5	124437528	G	A	6.82876	0.605792
	SOVchr5-124449005	5	124449005	G	T	6.82876	0.605792
	SOVchr5-124476729	5	124476729	G	A	6.82876	0.605792
	SOVchr5-124496191	5	124496191	C	G	6.82876	0.605792
	SOVchr5-124531677	5	124531677	A	G	6.82876	0.605792
	SOVchr5-124593618	5	124593618	A	T	6.82876	0.605792
	SOVchr5-124593626	5	124593626	A	T	6.82876	0.605792
	SOVchr5-124615448	5	124615448	G	A	6.82876	0.605792
	SOVchr5-124616935	5	124616935	G	A	6.82876	0.605792
	SOVchr5-124707553	5	124707553	C	T	6.82876	0.605792
	SOVchr5-124714444	5	124714444	C	A	6.82876	0.605792
	SOVchr5-124789757	5	124789757	C	T	6.82876	0.605792
	SOVchr5-124805605	5	124805605	T	G	6.82876	0.605792
	SOVchr5-124822404	5	124822404	G	A	6.82876	0.605792
	SOVchr5-124826371	5	124826371	G	A	6.82876	0.605792
	SOVchr5-124922809	5	124922809	A	G	6.82876	0.605792
	SOVchr5-124950610	5	124950610	G	T	6.82876	0.605792
	SOVchr5-124950928	5	124950928	A	C	6.82876	0.605792
	SOVchr5-124951072	5	124951072	T	A	6.82876	0.605792
	SOVchr5-124954489	5	124954489	T	A	6.82876	0.605792
	SOVchr5-124957282	5	124957282	C	T	6.82876	0.605792
	SOVchr5-124957861	5	124957861	G	T	6.82876	0.605792
	SOVchr5-124958969	5	124958969	C	G	6.82876	0.605792
	SOVchr5-124962266	5	124962266	C	A	6.82876	0.605792
	SOVchr5-124968156	5	124968156	C	A	6.82876	0.605792
	SOVchr5-124986629	5	124986629	G	C	6.82876	0.605792
	SOVchr5-124986881	5	124986881	C	T	6.82876	0.605792
	SOVchr5-124988045	5	124988045	T	A	6.82876	0.605792
	SOVchr5-124996100	5	124996100	T	G	6.82876	0.605792
	SOVchr5-124997260	5	124997260	G	A	6.82876	0.605792
	SOVchr5-124997270	5	124997270	G	C	6.82876	0.605792
	SOVchr5-124998054	5	124998054	C	T	6.82876	0.605792
	SOVchr5-125000071	5	125000071	C	A	6.82876	0.605792
	SOVchr5-125004401	5	125004401	T	A	6.82876	0.605792
	SOVchr5-125014015	5	125014015	C	A	6.82876	0.605792
	SOVchr5-125014205	5	125014205	G	T	6.82876	0.605792
	SOVchr5-125014830	5	125014830	G	A	6.82876	0.605792
	SOVchr5-125015239	5	125015239	G	A	6.82876	0.605792
	SOVchr5-125015445	5	125015445	G	A	6.82876	0.605792
	SOVchr5-125015788	5	125015788	C	T	6.82876	0.605792
	SOVchr5-125017176	5	125017176	G	A	6.82876	0.605792
	SOVchr5-125083812	5	125083812	T	C	6.82876	0.605792
	SOVchr5-125089859	5	125089859	C	A	6.82876	0.605792
	SOVchr5-125102882	5	125102882	G	T	6.82876	0.605792
	SOVchr5-125105329	5	125105329	G	A	6.82876	0.605792
	SOVchr5-125105330	5	125105330	C	A	6.82876	0.605792
	SOVchr5-125118132	5	125118132	G	A	6.82876	0.605792
	SOVchr5-125142351	5	125142351	G	A	6.82876	0.605792
	SOVchr5-125144997	5	125144997	G	A	6.82876	0.605792
	SOVchr5-125145018	5	125145018	G	A	6.82876	0.605792
	SOVchr5-125147905	5	125147905	G	A	6.82876	0.605792
	SOVchr5-125150368	5	125150368	C	A	6.82876	0.605792
	SOVchr5-125151638	5	125151638	T	G	6.82876	0.605792
	SOVchr5-125180754	5	125180754	G	C	6.82876	0.605792
	SOVchr5-125183296	5	125183296	G	A	6.82876	0.605792
	SOVchr5-125185959	5	125185959	G	T	6.82876	0.605792
	SOVchr5-125186035	5	125186035	A	T	6.82876	0.605792
	SOVchr5-125187337	5	125187337	A	C	6.82876	0.605792
	SOVchr5-125192298	5	125192298	G	A	6.82876	0.605792
	SOVchr5-125198281	5	125198281	C	A	6.82876	0.605792
	SOVchr5-125243081	5	125243081	A	T	6.82876	0.605792
	SOVchr5-125280730	5	125280730	A	G	6.82876	0.605792
	SOVchr5-125357170	5	125357170	A	G	6.82876	0.605792
	SOVchr5-125381450	5	125381450	G	A	6.82876	0.605792
	SOVchr5-125387923	5	125387923	C	T	6.82876	0.605792
	SOVchr5-125387931	5	125387931	G	A	6.82876	0.605792
	SOVchr5-125414971	5	125414971	C	T	6.82876	0.605792
	SOVchr5-125450570	5	125450570	C	A	6.82876	0.605792
	SOVchr5-125488133	5	125488133	C	T	6.82876	0.605792
	SOVchr5-113696755	5	113696755	T	A	6.81848	0.367548
	SOVchr1-87238079	1	87238079	C	T	6.80654	0.453463
	SOVchr5-16012490	5	16012490	G	A	6.80366	0.367859
	SOVchr4-8617912	4	8617912	G	A	6.80037	0.531703
	SOVchr4-16591097	4	16591097	T	C	6.80037	0.531703
	SOVchr4-16591132	4	16591132	A	G	6.80037	0.531703
	SOVchr5-31637003	5	31637003	A	G	6.80037	0.531703
	SOVchr1-85341103	1	85341103	T	A	6.79749	0.617258
	SOVchr1-79052669	1	79052669	C	A	6.79584	0.444306
	SOVchr5-82375012	5	82375012	G	A	6.79243	0.613455
	SOVchr5-116215142	5	116215142	G	T	6.78131	0.583581
	SOVchr5-116228376	5	116228376	G	A	6.78131	0.583581
	SOVchr5-116230003	5	116230003	C	T	6.78131	0.583581
	SOVchr5-116236388	5	116236388	C	T	6.78131	0.583581
	SOVchr5-116355479	5	116355479	G	A	6.78131	0.583581
	SOVchr5-116387093	5	116387093	C	A	6.78131	0.583581
	SOVchr5-116430752	5	116430752	A	G	6.78131	0.583581
	SOVchr5-116439993	5	116439993	G	A	6.78131	0.583581
	SOVchr5-116443259	5	116443259	A	T	6.78131	0.583581
	SOVchr5-116491952	5	116491952	T	A	6.78131	0.583581
	SOVchr5-116576030	5	116576030	C	T	6.78131	0.583581
	SOVchr5-116613211	5	116613211	T	A	6.78131	0.583581
	SOVchr5-116651356	5	116651356	A	T	6.78131	0.583581
	SOVchr5-116677443	5	116677443	A	T	6.78131	0.583581
	SOVchr5-116699680	5	116699680	C	G	6.78131	0.583581
	SOVchr5-116702071	5	116702071	G	A	6.78131	0.583581
	SOVchr5-116716507	5	116716507	G	A	6.78131	0.583581
	SOVchr5-116768528	5	116768528	T	C	6.78131	0.583581
	SOVchr5-116772278	5	116772278	A	G	6.78131	0.583581
	SOVchr5-116772326	5	116772326	G	A	6.78131	0.583581
	SOVchr5-116777163	5	116777163	G	A	6.78131	0.583581
	SOVchr5-116777392	5	116777392	G	C	6.78131	0.583581
	SOVchr5-116912155	5	116912155	C	G	6.78131	0.583581
	SOVchr5-117005956	5	117005956	C	A	6.78131	0.583581
	SOVchr5-117332794	5	117332794	A	G	6.78131	0.583581
	SOVchr5-117361052	5	117361052	C	A	6.78131	0.583581
	SOVchr5-117549488	5	117549488	C	A	6.78131	0.583581
	SOVchr5-117749702	5	117749702	G	A	6.78131	0.583581
	SOVchr5-117823922	5	117823922	T	A	6.78131	0.583581
	SOVchr5-118113425	5	118113425	G	A	6.78131	0.583581
	SOVchr5-118137421	5	118137421	G	A	6.78131	0.583581
	SOVchr5-118272614	5	118272614	C	T	6.78131	0.583581
	SOVchr5-118426734	5	118426734	C	A	6.78131	0.583581
	SOVchr5-118743129	5	118743129	C	A	6.78131	0.583581
	SOVchr5-118805898	5	118805898	T	G	6.78131	0.583581
	SOVchr5-118830635	5	118830635	G	A	6.78131	0.583581
	SOVchr5-118981363	5	118981363	C	T	6.78131	0.583581
	SOVchr5-119209887	5	119209887	C	A	6.78131	0.583581
	SOVchr5-119593782	5	119593782	C	T	6.78131	0.583581
	SOVchr5-119717668	5	119717668	C	T	6.78131	0.583581
	SOVchr5-119804596	5	119804596	C	A	6.78131	0.583581
	SOVchr5-120048993	5	120048993	G	A	6.78131	0.583581
	SOVchr5-120368849	5	120368849	C	T	6.78131	0.583581
	SOVchr5-120452741	5	120452741	C	T	6.78131	0.583581
	SOVchr5-120557819	5	120557819	G	T	6.78131	0.583581
	SOVchr5-120627091	5	120627091	T	A	6.78131	0.583581
	SOVchr5-120662821	5	120662821	A	G	6.78131	0.583581
	SOVchr5-120668904	5	120668904	G	T	6.78131	0.583581
	SOVchr5-120846502	5	120846502	G	T	6.78131	0.583581
	SOVchr5-120931189	5	120931189	C	G	6.78131	0.583581
	SOVchr5-121231672	5	121231672	G	A	6.78131	0.583581
	SOVchr5-121288256	5	121288256	G	A	6.78131	0.583581
	SOVchr5-121531849	5	121531849	G	A	6.78131	0.583581
	SOVchr5-121773518	5	121773518	G	A	6.78131	0.583581
	SOVchr5-122025784	5	122025784	G	A	6.78131	0.583581
	SOVchr5-122216551	5	122216551	T	C	6.78131	0.583581
	SOVchr5-122241637	5	122241637	C	G	6.78131	0.583581
	SOVchr5-122358043	5	122358043	T	C	6.78131	0.583581
	SOVchr5-122581533	5	122581533	A	G	6.78131	0.583581
	SOVchr5-122858246	5	122858246	G	A	6.78131	0.583581
	SOVchr5-122882310	5	122882310	G	A	6.78131	0.583581
	SOVchr5-122904787	5	122904787	C	T	6.78131	0.583581
	SOVchr5-123010404	5	123010404	G	C	6.78131	0.583581
	SOVchr5-123392075	5	123392075	C	T	6.78131	0.583581
	SOVchr5-123776610	5	123776610	C	T	6.78131	0.583581
	SOVchr5-123842980	5	123842980	G	A	6.78131	0.583581
	SOVchr5-123908914	5	123908914	C	G	6.78131	0.583581
	SOVchr5-123995538	5	123995538	A	G	6.78131	0.583581
	SOVchr5-124998813	5	124998813	G	T	6.78131	0.583581
	SOVchr5-125107764	5	125107764	G	A	6.78131	0.583581
	SOVchr5-125146409	5	125146409	C	T	6.78131	0.583581
	SOVchr5-125190820	5	125190820	G	A	6.78131	0.583581
	SOVchr5-125347506	5	125347506	A	T	6.78131	0.583581
	SOVchr5-125354049	5	125354049	C	T	6.78131	0.583581
	SOVchr2-31896865	2	31896865	T	C	6.7629	0.455695
	SOVchr4-172225081	4	172225081	G	T	6.74877	0.397544
	SOVchr4-125382364	4	125382364	G	A	6.7458	0.621019
	SOVchr5-21066779	5	21066779	G	A	6.73693	0.543887
	SOVchr5-21066830	5	21066830	C	G	6.73693	0.543887
	SOVchr5-57217884	5	57217884	G	T	6.72903	0.558355
	SOVchr5-57877513	5	57877513	C	T	6.72903	0.558355
	SOVchr4-6594625	4	6594625	T	A	6.72875	0.557755
	SOVchr5-22697480	5	22697480	G	A	6.72371	0.543835
	SOVchr5-22930199	5	22930199	G	A	6.72371	0.543835
	SOVchr5-28549715	5	28549715	A	C	6.72371	0.543835
	SOVchr5-28587133	5	28587133	C	T	6.72371	0.543835
	SOVchr5-28587801	5	28587801	T	G	6.72371	0.543835
	SOVchr5-28975988	5	28975988	C	T	6.72371	0.543835
	SOVchr5-42469262	5	42469262	T	A	6.72371	0.543835
	SOVchr5-82334879	5	82334879	G	A	6.72361	0.563121
	SOVchr5-116460669	5	116460669	G	A	6.72361	0.563121
	SOVchr5-116460670	5	116460670	G	A	6.72361	0.563121
	SOVchr5-120919767	5	120919767	G	A	6.72361	0.563121
	SOVchr4-140356074	4	140356074	A	C	6.72025	0.511633
	SOVchr4-8509289	4	8509289	G	A	6.71381	0.570313
	SOVchr4-8512214	4	8512214	C	G	6.71381	0.570313
	SOVchr4-8529940	4	8529940	G	A	6.71381	0.570313
	SOVchr4-8529997	4	8529997	G	A	6.71381	0.570313
	SOVchr4-8542147	4	8542147	C	T	6.71381	0.570313
	SOVchr4-8543871	4	8543871	C	T	6.71381	0.570313
	SOVchr4-8544887	4	8544887	T	C	6.71381	0.570313
	SOVchr4-8544922	4	8544922	G	A	6.71381	0.570313
	SOVchr4-8545436	4	8545436	C	T	6.71381	0.570313
	SOVchr4-8548999	4	8548999	G	A	6.71381	0.570313
	SOVchr4-8571972	4	8571972	C	T	6.71381	0.570313
	SOVchr4-8572646	4	8572646	C	T	6.71381	0.570313
	SOVchr4-8573657	4	8573657	C	T	6.71381	0.570313
	SOVchr4-8574123	4	8574123	G	A	6.71381	0.570313
	SOVchr4-8587512	4	8587512	C	T	6.71381	0.570313
	SOVchr4-8590242	4	8590242	T	A	6.71381	0.570313
	SOVchr4-8601114	4	8601114	G	A	6.71381	0.570313
	SOVchr4-8602611	4	8602611	C	A	6.71381	0.570313
	SOVchr4-8603245	4	8603245	G	A	6.71381	0.570313
	SOVchr4-8603717	4	8603717	C	A	6.71381	0.570313
	SOVchr4-8606239	4	8606239	T	A	6.71381	0.570313
	SOVchr4-8606352	4	8606352	C	A	6.71381	0.570313
	SOVchr4-8609225	4	8609225	G	A	6.71381	0.570313
	SOVchr4-8609530	4	8609530	C	T	6.71381	0.570313
	SOVchr4-8609897	4	8609897	G	A	6.71381	0.570313
	SOVchr4-8610540	4	8610540	C	T	6.71381	0.570313
	SOVchr4-8610559	4	8610559	G	C	6.71381	0.570313
	SOVchr4-8625624	4	8625624	T	C	6.71381	0.570313
	SOVchr4-8626172	4	8626172	C	T	6.71381	0.570313
	SOVchr4-8626677	4	8626677	G	T	6.71381	0.570313
	SOVchr4-8627156	4	8627156	G	A	6.71381	0.570313
	SOVchr4-8629496	4	8629496	T	A	6.71381	0.570313
	SOVchr4-8633094	4	8633094	C	T	6.71381	0.570313
	SOVchr4-8633644	4	8633644	A	G	6.71381	0.570313
	SOVchr4-8634313	4	8634313	G	A	6.71381	0.570313
	SOVchr4-8637019	4	8637019	A	T	6.71381	0.570313
	SOVchr4-8638129	4	8638129	C	T	6.71381	0.570313
	SOVchr4-8638881	4	8638881	A	G	6.71381	0.570313
	SOVchr4-8640804	4	8640804	C	T	6.71381	0.570313
	SOVchr5-28540330	5	28540330	A	G	6.71225	0.541341
	SOVchr5-28950978	5	28950978	C	G	6.71225	0.541341
	SOVchr5-28966141	5	28966141	C	T	6.71225	0.541341
	SOVchr5-116187199	5	116187199	C	T	6.70796	0.641483
	SOVchr5-51266439	5	51266439	T	G	6.70518	0.452317
	SOVchr5-57664368	5	57664368	G	A	6.70065	0.619665
	SOVchr5-57664573	5	57664573	C	A	6.70065	0.619665
	SOVchr5-57789379	5	57789379	G	A	6.70065	0.619665
	SOVchr5-57924954	5	57924954	A	G	6.70065	0.619665
	SOVchr4-59783924	4	59783924	C	T	6.68624	0.551627
	SOVchr4-60050672	4	60050672	C	A	6.68624	0.551627
	SOVchr4-61974810	4	61974810	C	T	6.68624	0.551627
	SOVchr4-63266992	4	63266992	C	T	6.68624	0.551627
	SOVchr4-67632663	4	67632663	C	T	6.68624	0.551627
	SOVchr4-77072550	4	77072550	C	T	6.68624	0.551627
	SOVchr4-80384218	4	80384218	G	A	6.68624	0.551627
	SOVchr4-80915335	4	80915335	C	T	6.68624	0.551627
	SOVchr4-87354588	4	87354588	G	A	6.68624	0.551627
	SOVchr4-91806895	4	91806895	G	T	6.68624	0.551627
	SOVchr4-225156	4	225156	A	T	6.68465	0.476126
	SOVchr1-90206012	1	90206012	C	A	6.67024	0.667141
	SOVchr5-116237538	5	116237538	G	A	6.65925	0.570377
	SOVchr6-67919322	6	67919322	A	C	6.65852	0.419019
	SOVchr4-16636484	4	16636484	T	G	6.65616	0.54399
	SOVchr5-108559389	5	108559389	C	A	6.64865	0.556191
	SOVchr5-108649698	5	108649698	C	G	6.64865	0.556191
	SOVchr5-108661490	5	108661490	G	A	6.64865	0.556191
	SOVchr5-108694950	5	108694950	G	A	6.64865	0.556191
	SOVchr5-108725917	5	108725917	G	T	6.64865	0.556191
	SOVchr5-108744535	5	108744535	G	A	6.64865	0.556191
	SOVchr5-108861540	5	108861540	G	A	6.64865	0.556191
	SOVchr5-108960587	5	108960587	G	T	6.64865	0.556191
	SOVchr5-109014334	5	109014334	A	C	6.64865	0.556191
	SOVchr5-109121406	5	109121406	A	G	6.64865	0.556191
	SOVchr5-109142782	5	109142782	G	A	6.64865	0.556191
	SOVchr5-109216843	5	109216843	G	A	6.64865	0.556191
	SOVchr5-109262361	5	109262361	C	A	6.64865	0.556191
	SOVchr5-109284110	5	109284110	A	T	6.64865	0.556191
	SOVchr5-109289907	5	109289907	A	G	6.64865	0.556191
	SOVchr5-109302588	5	109302588	T	G	6.64865	0.556191
	SOVchr5-109351288	5	109351288	T	G	6.64865	0.556191
	SOVchr5-109360298	5	109360298	G	C	6.64865	0.556191
	SOVchr5-109407645	5	109407645	C	T	6.64865	0.556191
	SOVchr5-109443994	5	109443994	A	C	6.64865	0.556191
	SOVchr5-109444110	5	109444110	A	T	6.64865	0.556191
	SOVchr5-109493343	5	109493343	G	A	6.64865	0.556191
	SOVchr5-109494639	5	109494639	G	C	6.64865	0.556191
	SOVchr5-109503890	5	109503890	G	C	6.64865	0.556191
	SOVchr5-109532325	5	109532325	G	T	6.64865	0.556191
	SOVchr5-109622901	5	109622901	T	G	6.64865	0.556191
	SOVchr5-109647544	5	109647544	G	A	6.64865	0.556191
	SOVchr5-109662201	5	109662201	C	T	6.64865	0.556191
	SOVchr5-109662601	5	109662601	G	A	6.64865	0.556191
	SOVchr5-109728902	5	109728902	C	A	6.64865	0.556191
	SOVchr5-109818566	5	109818566	A	G	6.64865	0.556191
	SOVchr5-109852371	5	109852371	G	C	6.64865	0.556191
	SOVchr5-116784745	5	116784745	G	T	6.63662	0.558505
	SOVchr5-116837459	5	116837459	G	A	6.63662	0.558505
	SOVchr5-114276028	5	114276028	A	T	6.62842	0.546292
	SOVchr5-114514000	5	114514000	C	A	6.62842	0.546292
	SOVchr5-114570767	5	114570767	G	T	6.62842	0.546292
	SOVchr5-114658834	5	114658834	T	C	6.62842	0.546292
	SOVchr5-115189126	5	115189126	A	T	6.62842	0.546292
	SOVchr5-115220978	5	115220978	C	T	6.62842	0.546292
	SOVchr5-115306226	5	115306226	C	A	6.62842	0.546292
	SOVchr5-115389879	5	115389879	C	T	6.62842	0.546292
	SOVchr5-115531123	5	115531123	A	G	6.62842	0.546292
	SOVchr5-115546719	5	115546719	C	T	6.62842	0.546292
	SOVchr5-115799517	5	115799517	G	A	6.62842	0.546292
	SOVchr5-115878757	5	115878757	G	A	6.62842	0.546292
	SOVchr5-115971187	5	115971187	A	G	6.62842	0.546292
	SOVchr5-116000238	5	116000238	T	C	6.62842	0.546292
	SOVchr2-65375560	2	65375560	T	C	6.62629	0.500381
	SOVchr5-58667896	5	58667896	A	G	6.61401	0.488268
	SOVchr4-50159333	4	50159333	G	T	6.57338	0.56025
	SOVchr6-107586848	6	107586848	A	G	6.57307	1.04844
	SOVchr5-58659681	5	58659681	A	C	6.56394	0.505751
	SOVchr5-68545442	5	68545442	C	T	6.54841	0.566665
	SOVchr1-24241760	1	24241760	C	A	6.53889	0.492211
	SOVchr5-114419324	5	114419324	G	A	6.53432	0.600437
	SOVchr5-114648039	5	114648039	G	A	6.53432	0.600437
	SOVchr5-114648072	5	114648072	C	T	6.53432	0.600437
	SOVchr5-114677650	5	114677650	G	A	6.53432	0.600437
	SOVchr5-114874672	5	114874672	A	T	6.53432	0.600437
	SOVchr5-114983670	5	114983670	C	T	6.53432	0.600437
	SOVchr5-114983705	5	114983705	G	T	6.53432	0.600437
	SOVchr5-115256653	5	115256653	T	C	6.53432	0.600437
	SOVchr5-115874672	5	115874672	G	T	6.53432	0.600437
	SOVchr5-115874679	5	115874679	T	A	6.53432	0.600437
	SOVchr1-99611895	1	99611895	C	T	6.53031	0.522901
	SOVchr1-99611950	1	99611950	A	T	6.53031	0.522901
	SOVchr5-58737243	5	58737243	A	G	6.53031	0.522901
	SOVchr5-58747147	5	58747147	C	A	6.53031	0.522901
	SOVchr5-58747168	5	58747168	C	T	6.53031	0.522901
Fe	SOVchr1-43602473	1	43602473	C	A	6.74814	42.029
	SOVchr5-91913409	5	91913409	T	C	6.64182	48.3634
