# Supplementary material for: A Genome-Wide Association Study Reveals the Genetic Mechanisms of Nutrient Accumulation in Spinach
Source: Genes (Basel). 2024 Jan 28;15(2):172. doi: 10.3390/genes15020172 (PMC10887921; doi:10.3390/genes15020172)
Supplement: Supplementary file 1 [file genes-15-00172-s001.zip › Table S4.xlsx]

## Sheet: Sheet1
Table S4. Putative genes associated with the nutritional composition of spinach within candidate regions based on associated SNPs
Trait	SNP	Gene	Position	Homologs of Arabidopsis	Functional Annotation
Chlorophyll A	SOVchr1-93820586	SOV1g020220	SOVchr1:93828109_93830147	AT3G08040	Protein DETOXIFICATION
	SOVchr1-102349573	SOV1g023960	SOVchr1:102345564_102350170		Unknown protein
	SOVchr2-99992382	SOV2g028880	SOVchr2:99988534_99989923		Cysteine proteinase inhibitor 2
		SOV2g028890	SOVchr2:99990251_99995133	AT1G51160	Trafficking protein particle complex subunit
		SOV2g028900	SOVchr2:99998934_100000133	AT2G19640	SET domain-containing protein
	SOVchr2-106431396	SOV2g033660	SOVchr2:106422817_106423857	AT4G01410	LEA_2 domain-containing protein
	SOVchr4-15576042	SOV4g009330	SOVchr4:15576060_15582912	AT2G24100	ATP-dependent DNA helicase
	SOVchr4-15577273	SOV4g009340	SOVchr4:15585491_15593716	AT1G56350	Peptide chain release factor 2
	SOVchr4-15651353	SOV4g009350	SOVchr4:15640283_15643333		Unknown protein
	SOVchr4-23564477	SOV4g012170	SOVchr4:23561692_23566490	AT5G27450	Mevalonate kinase
		SOV4g012180	SOVchr4:23571038_23571801	AT5G27550	Kinesin-like protein
		SOV4g012190	SOVchr4:23572866_23573335	AT5G64760	26S proteasome regulatory subunit family protein
		SOV4g012200	SOVchr4:23603682_23614299	AT1G08980	Glutamyl-tRNA(Gln) amidotransferase subunit A
		SOV4g012210	SOVchr4:23616126_23623236	AT1G05460	Putative RNA helicase SDE3
		SOV4g012220	SOVchr4:23623496_23626182	AT5G64330	Putative SKP1/BTB/POZ domain, NPH3 domain-containing protein
		SOV4g012230	SOVchr4:23626406_23627677	AT1G76360	Protein kinase
		SOV4g012240	SOVchr4:23630986_23631633	AT5G27440	Transmembrane protein
		SOV4g012250	SOVchr4:23632267_23638833	AT1G54850	SHSP domain-containing protein
		SOV4g012260	SOVchr4:23640670_23643280	AT1G20870	SHSP domain-containing protein
		SOV4g012270	SOVchr4:23643248_23655242		Unknown protein
	SOVchr4-25212504	SOV4g012690	SOVchr4:25210795_25212225	AT1G69630	F-box protein
	SOVchr4-25233856	SOV4g012700	SOVchr4:25239636_25240775	AT3G05200	RING-type domain-containing protein
	SOVchr4-25358428	SOV4g012710	SOVchr4:25348070_25352450	AT3G05200	RING-type domain-containing protein
	SOVchr4-25473718	SOV4g012720	SOVchr4:25476856_25478028	AT3G05200	RING-type domain-containing protein
	SOVchr4-25730145	SOV4g012750	SOVchr4:25723493_25727149	AT1G72210	Putative transcription factor bHLH family
	SOVchr4-25791730	SOV4g012760	SOVchr4:25786429_25792216	AT1G68390	Core-2/I-branching beta-1%2C6-N-acetylglucosaminyltransferase family protein
	SOVchr4-25810888	SOV4g012770	SOVchr4:25803749_25816244	AT5G27410	Branched-chain amino acid aminotransferase
	SOVchr4-25906777	SOV4g012780	SOVchr4:25906153_25909538		Unknown protein
	SOVchr4-25922401	SOV4g012790	SOVchr4:25923259_25928855		Unknown protein
		SOV4g012800	SOVchr4:25929126_25936112		Unknown protein
	SOVchr4-25941398	SOV4g012810	SOVchr4:25938146_25941130		Unknown protein
	SOVchr4-25963219	SOV4g012820	SOVchr4:25966225_25967701		Unknown protein
	SOVchr4-25988105	SOV4g012830	SOVchr4:25988450_25992018	AT3G22170	SWIM-type domain-containing protein
	SOVchr4-25994981	SOV4g012840	SOVchr4:25994935_25995336		Unknown protein
	SOVchr4-26002225	SOV4g012850	SOVchr4:26002518_26005550		Unknown protein
	SOVchr4-26036277	SOV4g012860	SOVchr4:26042216_26044234	AT2G01050	DUF4283 domain-containing protein
	SOVchr4-26209654	SOV4g012870	SOVchr4:26202353_26203991		Unknown protein
		SOV4g012880	SOVchr4:26206279_26214564	AT5G27400	Protein-lysine N-methyltransferase
	SOVchr4-26217597	SOV4g012890	SOVchr4:26216301_26218651	AT3G06250	FAR1 domain-containing protein
		SOV4g012900	SOVchr4:26218923_26229625		SWIM-type domain-containing protein
	SOVchr4-26244673	SOV4g012910	SOVchr4:26252692_26255831	AT2G41490	Phospho-N-acetylmuramoyl-pentapeptide-transferase
	SOVchr4-26273973	SOV4g012920	SOVchr4:26267097_26316388	AT4G25940	ENTH domain-containing protein
	SOVchr4-26318555	SOV4g012930	SOVchr4:26316536_26324847	AT1G55500	YTH domain-containing protein
	SOVchr4-26336270	SOV4g012940	SOVchr4:26335164_26339622		Myb_CC_LHEQLE domain-containing protein
		SOV4g012950	SOVchr4:26341760_26352592	AT3G63480	Kinesin-like protein
		SOV4g012960	SOVchr4:26353123_26355483	AT1G54790	GDSL esterase/lipase
		SOV4g012970	SOVchr4:26354796_26357732	AT1G54780	TPM_phosphatase domain-containing protein
	SOVchr4-27308096	SOV4g013210	SOVchr4:27129836_27131038		Unknown protein
		SOV4g013220	SOVchr4:27281321_27284799	AT3G09270	Glutathione S-transferase
		SOV4g013230	SOVchr4:27287004_27291239		Unknown protein
		SOV4g013240	SOVchr4:27367020_27367784		DNA-directed DNA polymerase
	SOVchr4-65150089	SOV4g020900	SOVchr4:65132771_65133499	AT1G54540	LEA_2 domain-containing protein
		SOV4g020910	SOVchr4:65136334_65138571	AT5G44750	DNA repair protein REV1
		SOV4g020920	SOVchr4:65142548_65142943	AT5G60390	Elongation factor 1-alpha
Chlorophyll B	SOVchr1-93820586	SOV1g020220	SOVchr1:93828109_93830147	AT3G08040	Protein DETOXIFICATION
	SOVchr4-6134363	SOV4g004970	SOVchr4:6045383_6046093		3'-5' exonuclease domain-containing protein
		SOV4g004980	SOVchr4:6048563_6049518		Unknown protein
		SOV4g004990	SOVchr4:6093790_6095004	AT2G01050	CCHC-type domain-containing protein
		SOV4g005000	SOVchr4:6096472_6097098		3'-5' exonuclease domain-containing protein
		SOV4g005010	SOVchr4:6111986_6113497		3'-5' exonuclease domain-containing protein
		SOV4g005020	SOVchr4:6137683_6143214		probable nucleoredoxin 2 isoform X2
		SOV4g005030	SOVchr4:6163793_6167730		3'-5' exonuclease domain-containing protein
		SOV4g005040	SOVchr4:6184588_6195375		3'-5' exonuclease domain-containing protein
	SOVchr4-65150089	SOV4g020900	SOVchr4:65132771_65133499	AT1G54540	LEA_2 domain-containing protein
		SOV4g020910	SOVchr4:65136334_65138571	AT5G44750	DNA repair protein REV1
		SOV4g020920	SOVchr4:65142548_65142943	AT1G07920	Elongation factor 1-alpha
Oxalate	SOVchr1-50731214	SOV1g009810	SOVchr1:50704746_50717240	AT4G13590	GDT1 family protein
	SOVchr1-50934532	SOV1g009820	SOVchr1:50879476_50883262	AT3G24040	beta-glucuronosyltransferase GlcAT14A
		SOV1g009830	SOVchr1:50886648_50887114	AT3G62950	Glutaredoxin
		SOV1g009840	SOVchr1:50904200_50904508	AT3G62950	Glutaredoxin family protein
	SOVchr1-119069592	SOV1g034140	SOVchr1:119060816_119068335	AT5G58230	WD_REPEATS_REGION domain-containing protein
	SOVchr2-79590343	SOV2g019330	SOVchr2:79548614_79555565	AT4G09000	Putative 14-3-3 domain-containing protein
		SOV2g019340	SOVchr2:79556470_79557385		Unknown protein
		SOV2g019350	SOVchr2:79575517_79576569	AT2G25520	TPT domain-containing protein
		SOV2g019360	SOVchr2:79621390_79624993	AT5G15050	Beta-glucuronosyltransferase
		SOV2g019370	SOVchr2:79627664_79629222		Reverse transcriptase domain-containing protein
	SOVchr3-43424516	SOV3g021990	SOVchr3:43400952_43402993	AT1G46480	PREDICTED: WUSCHEL-related homeobox
		SOV3g022000	SOVchr3:43469752_43471966		ANK_REP_REGION domain-containing protein
Nitrate	SOVchr1-64255238	SOV1g012470	SOVchr1:64246135_64248536		ULP_PROTEASE domain-containing protein
		SOV1g012480	SOVchr1:64272252_64288320	AT5G39770	ERCC4 domain-containing protein
	SOVchr1-64490849	SOV1g012490	SOVchr1:64425704_64426267	AT1G65870	Dirigent protein
		SOV1g012500	SOVchr1:64432500_64437411	AT1G29050	Trichome birefringence-like family
		SOV1g012510	SOVchr1:64438770_64442409		Unknown protein
	SOVchr1-64636577	SOV1g012540	SOVchr1:64628600_64630791	AT2G27110	SWIM-type domain-containing protein
	SOVchr1-64667101	SOV1g012550	SOVchr1:64651621_64663241	AT5G08690	ATP synthase subunit beta
	SOVchr1-64675881	SOV1g012560	SOVchr1:64663293_64679250	AT2G38780	Cytochrome C oxidase subunit
	SOVchr1-64740737	SOV1g012570	SOVchr1:64740715_64753149	AT2G38770	intron-binding protein aquarius
	SOVchr1-64820621	SOV1g012580	SOVchr1:64810875_64819668	AT1G63780	Brix domain-containing protein
	SOVchr1-64859462	SOV1g012590	SOVchr1:64864599_64869003	AT5G17230	Phytoene synthase
	SOVchr1-65008639	SOV1g012600	SOVchr1:65002953_65014334	AT3G12740	ALA-interacting subunit
	SOVchr1-65248580	SOV1g012610	SOVchr1:65137759_65138499	AT4G23160	Retrovirus-related Pol polyprotein from transposon TNT 1-94
		SOV1g012620	SOVchr1:65143746_65147844	AT1G76390	U-box domain-containing protein
		SOV1g012630	SOVchr1:65192238_65193864		Unknown protein
		SOV1g012640	SOVchr1:65199219_65199800	AT2G06265	zf-GRF domain-containing protein
		SOV1g012650	SOVchr1:65217732_65221117	AT3G27200	Phytocyanin domain-containing protein
		SOV1g012660	SOVchr1:65277332_65277740		RNase H domain-containing protein
		SOV1g012670	SOVchr1:65278260_65284401	AT3G53580	Diaminopimelate epimerase
		SOV1g012680	SOVchr1:65286070_65288466	AT3G10720	Pectinesterase
		SOV1g012690	SOVchr1:65289986_65314189	AT3G54510	CSC1-like protein
	SOVchr1-65439679	SOV1g012700	SOVchr1:65377682_65396915	AT3G07530	Beta-Casp domain-containing protein
	SOVchr1-94085756	SOV1g020330	SOVchr1:94076874_94091948	AT1G12250	Threonine--tRNA ligase
		SOV1g020340	SOVchr1:94098412_94099618	AT3G30210	MYB transcription factor
	SOVchr2-66337447	SOV2g014620	SOVchr2:66334263_66334643	AT4G15090	SWIM-type domain-containing protein
		SOV2g014630	SOVchr2:66334682_66339283		PREDICTED: E3 ubiquitin-ligase SINA
Soluble Sugar	SOVchr2-108273175	SOV2g035070	SOVchr2:108230065_108243791	AT3G12340	Peptidylprolyl isomerase
		SOV2g035080	SOVchr2:108243828_108249679	AT3G19910	RING-type domain-containing protein
		SOV2g035090	SOVchr2:108250508_108256438		Unknown protein
		SOV2g035100	SOVchr2:108258716_108262101	AT3G19940	MFS domain-containing protein
		SOV2g035110	SOVchr2:108264129_108265145	AT3G19950	RING-type domain-containing protein
		SOV2g035120	SOVchr2:108285934_108289547	AT5G08320	E2F-associated phosphoprotein
		SOV2g035130	SOVchr2:108291815_108301565	AT2G17980	SEC1 family transport protein SLY1-like
		SOV2g035140	SOVchr2:108302067_108303324	AT2G01350	Nicotinate-nucleotide pyrophosphorylase [carboxylating]
Mn	SOVchr4-54452300	SOV4g019330	SOVchr4:54488284_54494452		Unknown protein
	SOVchr5-40744482	SOV5g022250	SOVchr5:40777237_40779762	AT5G03680	Trihelix transcription factor PTL-like
	SOVchr5-42208975	SOV5g022600	SOVchr5:42129979_42140805	AT3G17430	TPT domain-containing protein
		SOV5g022610	SOVchr5:42184364_42184723		Retrotrans_gag domain-containing protein
		SOV5g022620	SOVchr5:42185052_42187161		ENDO3c domain-containing protein
		SOV5g022630	SOVchr5:42207523_42212741		Retrotrans_gag domain-containing protein
		SOV5g022640	SOVchr5:42215333_42216736	AT5G04390	Zinc finger protein ZAT5-like
Cu	SOVchr2-105094612	SOV2g032680	SOVchr2:105076160_105078336		RNase H domain-containing protein
		SOV2g032690	SOVchr2:105080171_105084910	AT4G01050	Rhodanese domain-containing protein
		SOV2g032700	SOVchr2:105085547_105091070	AT4G01040	Glyco_18 domain-containing protein
		SOV2g032710	SOVchr2:105097298_105100060	AT4G01030	Pentatricopeptide repeat-containing protein
	SOVchr3-33311145	SOV3g018830	SOVchr3:33289416_33302656	AT3G14470	Putative disease resistance protein
		SOV3g018840	SOVchr3:33307485_33309407	AT5G65570	Pentatricopeptide repeat-containing protein
		SOV3g018850	SOVchr3:33320808_33329421	AT3G10330	Transcription initiation factor TFIIB
	SOVchr3-136997057	SOV3g041250	SOVchr3:136998433_137007383		ULP_PROTEASE domain-containing protein
		SOV3g041260	SOVchr3:137010884_137013182	AT5G15610	Eukaryotic translation initiation factor 3 subunit M
Fe	SOVchr1-43602473	SOV1g008470	SOVchr1:43550342_43557795		N-acetylglucosaminyl-phosphatidylinositol biosynthetic protein gpi1
		SOV1g008480	SOVchr1:43699103_43701699	AT4G14716	1,2-dihydroxy-3-keto-5-methylthiopentene dioxygenase
	SOVchr5-91913409	SOV5g032830	SOVchr5:91904412_91910559	AT4G05530	Reductase
