# Supplementary material for: A Genome-Wide Association Study Reveals the Genetic Mechanisms of Nutrient Accumulation in Spinach
Source: Genes (Basel). 2024 Jan 28;15(2):172. doi: 10.3390/genes15020172 (PMC10887921; doi:10.3390/genes15020172)
Supplement: Supplementary file 1 [file genes-15-00172-s001.zip › Table S5.xlsx]

## Sheet: Sheet1
Table S5. Functional annotation information for exonic regions of candidate genes
Trait	Gene ID	Variant Type	Base Change	Amino Change
Chlorophyll A	SOV1g020220	nonsynonymous	A224T	E75V
		nonsynonymous	G242A	G81D
		nonsynonymous	G262A	E88K
		nonsynonymous	C554A	A185D
	SOV1g023960	nonsynonymous	C230G	A77G
		nonsynonymous	G215T	C72F
		stopgain	188_189insTACTTACAGTATTAAAAAGAATGACGAAACGTGATACGTTATTTTTTT	I63delinsITYSIKKNDETX
		nonsynonymous	A164G	N55S
		synonymous	C162T	I54I
		nonsynonymous	A158G	H53R
		nonsynonymous	A154G	K52E
		nonsynonymous	T148C	S50P
		nonsynonymous	G45A	M15I
		nonsynonymous	T32A	I11K
		nonsynonymous	T18G	I6M
	SOV2g028900	nonsynonymous	G271A	D91N
	SOV2g033660	synonymous	C330A	V110V
	SOV4g009350	synonymous	A477G	S159S
		nonsynonymous	T398C	V133A
		nonsynonymous	G340C	V114L
		nonsynonymous	G236C	R79T
	SOV4g009330	nonframeshift insertion	96_97insGGTGGC	G32delinsGGG
		synonymous	A204T	I68I
		nonsynonymous	C272T	A91V
		nonsynonymous	A1102G	I368V
	SOV4g009340	frameshift insertion	1476dupA	H493fs
		nonsynonymous	C1447T	L483F
	SOV4g009350	synonymous	A477G	S159S
		nonsynonymous	T398C	V133A
		nonsynonymous	G340C	V114L
		nonsynonymous	G236C	R79T
	SOV4g012170	nonsynonymous	A950G	E317G
		synonymous	A894G	L298L
	SOV4g012200	synonymous	G2247A	S749S
		nonsynonymous	A2231G	D744G
		nonsynonymous	G2219A	G740D
		nonsynonymous	G2218A	G740S
		nonsynonymous	C2207G	S736C
		synonymous	T2205C	L735L
		synonymous	C2181T	F727F
		nonsynonymous	C904T	L302F
	SOV4g012210	nonsynonymous	A934G	I312V
		nonsynonymous	G2170T	D724Y
		nonsynonymous	A2545G	I849V
		nonsynonymous	G2557C	E853Q
	SOV4g012220	synonymous	G1707T	L569L
		synonymous	C1312T	L438L
		synonymous	A375G	V125V
		synonymous	A264G	A88A
		synonymous	T243C	L81L
		synonymous	A234G	L78L
		synonymous	G219A	K73K
		synonymous	A207G	Q69Q
		synonymous	C201G	V67V
		nonsynonymous	A193G	N65D
		nonsynonymous	T187C	S63P
		synonymous	A186G	V62V
		synonymous	C175A	R59R
		synonymous	T165C	N55N
		nonsynonymous	G133A	V45I
		nonsynonymous	T132G	I44M
		nonsynonymous	A128T	D43V
		nonsynonymous	G121A	A41T
		nonsynonymous	T96G	H32Q
		synonymous	A90G	E30E
		nonframeshift deletion	65_79del	22_27del
		synonymous	A12G	K4K
		frameshift deletion	5_8del	K2fs
	SOV4g012230	nonsynonymous	C5A	A2E
		synonymous	T9C	G3G
		nonsynonymous	G79C	A27P
		nonsynonymous	G113A	R38K
		frameshift insertion	169dupA	V56fs
		nonsynonymous	G223C	E75Q
		nonsynonymous	T232C	S78P
		synonymous	T252C	A84A
	SOV4g012240	nonsynonymous	A6C	Q2H
		nonsynonymous	A10G	I4V
		nonsynonymous	G13T	A5S
		synonymous	C21A	P7P
		nonsynonymous	A22G	I8V
		synonymous	C75T	H25H
		nonsynonymous	G77A	S26N
		nonsynonymous	T78A	S26R
		synonymous	C81T	L27L
		synonymous	A372G	A124A
	SOV4g012250	synonymous	G288A	S96S
	SOV4g012690	nonsynonymous	A1259C	K420T
		stoploss	T1429C	X477Q
	SOV4g012700	synonymous	C474T	P158P
		nonsynonymous	C94G	Q32E
	SOV4g012710	nonsynonymous	T971G	V324G
		nonsynonymous	C968A	S323Y
		nonsynonymous	A752G	K251R
		nonsynonymous	T692A	M231K
		nonsynonymous	T220A	F74I
		nonsynonymous	C62G	A21G
	SOV4g012720	nonsynonymous	C739A	H247N
		nonsynonymous	G337A	V113I
	SOV4g012750	nonsynonymous	T151C	F51L
		nonsynonymous	G194C	S65T
		nonsynonymous	G233A	S78N
		nonsynonymous	T286C	S96P
		synonymous	T288A	S96S
		nonsynonymous	T883A	C295S
	SOV4g012760	synonymous	G753A	K251K
	SOV4g012770	nonsynonymous	C89T	T30I
	SOV4g012780	synonymous	C234T	D78D
		nonsynonymous	A121T	I41F
	SOV4g012790	nonsynonymous	A176C	K59T
	SOV4g012820	nonframeshift deletion	96_110del	32_37del
		nonsynonymous	C286A	L96I
		nonsynonymous	T287G	L96R
	SOV4g012830	nonsynonymous	G244T	A82S
		nonsynonymous	T218A	I73N
		synonymous	G168A	T56T
	SOV4g012840	nonsynonymous	G286T	D96Y
		nonsynonymous	A248G	K83R
		synonymous	C204T	A68A
	SOV4g012850	synonymous	C330G	P110P
	SOV4g012860	nonsynonymous	G1489C	V497L
		nonsynonymous	G1252A	G418S
		nonsynonymous	C1124T	P375L
		nonsynonymous	G622A	A208T
		frameshift deletion	463delG	A155fs
		frameshift deletion	455delA	K152fs
		nonsynonymous	C398A	T133N
		nonsynonymous	G253A	G85S
	SOV4g012870	nonsynonymous	T751G	F251V
		synonymous	T327C	N109N
	SOV4g012880	synonymous	T702C	I234I
		nonsynonymous	G607A	E203K
		synonymous	G387A	G129G
	SOV4g012890	nonsynonymous	A596T	K199M
		synonymous	T741A	A247A
	SOV4g012890	nonsynonymous	C779T	P260L
	SOV4g012910	synonymous	T240C	N80N
		synonymous	C282T	V94V
		nonsynonymous	G295A	V99I
		synonymous	C705G	G235G
		nonsynonymous	T721C	Y241H
		nonsynonymous	A739G	I247V
		synonymous	C741T	I247I
	SOV4g012920	nonsynonymous	T1285G	W429G
		synonymous	C1134T	S378S
		nonsynonymous	G1093T	V365L
		nonsynonymous	A968T	E323V
		stopgain	C751T	Q251X
		synonymous	C732A	I244I
		nonsynonymous	A671G	E224G
		synonymous	C519T	S173S
		nonsynonymous	C407T	T136I
		nonsynonymous	G92T	G31V
	SOV4g012930	nonsynonymous	T82C	F28L
		synonymous	T96C	Y32Y
		nonsynonymous	G182T	W61L
		stopgain	G197A	W66X
		nonsynonymous	G349A	D117N
		nonsynonymous	G469A	E157K
		frameshift insertion	604_605insGTAC	V202fs
		synonymous	C612T	V204V
		nonsynonymous	A635G	D212G
		nonsynonymous	G644A	C215Y
		nonsynonymous	C731T	S244L
		nonsynonymous	G742A	A248T
		nonsynonymous	G790C	V264L
		nonsynonymous	C797A	A266E
		nonsynonymous	G828C	W276C
		stopgain	G833A	W278X
		nonsynonymous	T836C	L279P
		nonsynonymous	G838T	G280C
		synonymous	T849A	S283S
		stopgain	C949T	Q317X
		nonsynonymous	C967G	L323V
	SOV4g012940	nonsynonymous	A1681C	I561L
	SOV4g012950	synonymous	C45T	S15S
		nonsynonymous	A67T	S23C
		synonymous	T78C	S26S
		synonymous	T84C	H28H
		synonymous	T108C	N36N
		synonymous	C201T	A67A
		nonsynonymous	G373A	A125T
		nonsynonymous	G409T	A137S
		synonymous	C666T	A222A
		synonymous	T873G	T291T
		synonymous	A897C	G299G
		nonsynonymous	C1041A	S347R
		nonsynonymous	G1055C	C352S
		synonymous	A1116C	G372G
		nonsynonymous	T1184A	M395K
		nonsynonymous	T1336A	F446I
	SOV4g012960	nonsynonymous	A14T	N5I
		synonymous	C16T	L6L
		synonymous	A135G	V45V
		nonsynonymous	A152G	E51G
		nonsynonymous	A157T	T53S
		synonymous	A234C	L78L
		synonymous	A402G	R134R
		synonymous	C651T	T217T
		nonsynonymous	G748A	A250T
		synonymous	G924A	P308P
	SOV4g012970	synonymous	A765G	T255T
		synonymous	C678G	V226V
		synonymous	T673C	L225L
		synonymous	C477T	Y159Y
		synonymous	C264T	S88S
		synonymous	C150T	S50S
		synonymous	T42C	L14L
	SOV4g013210	nonsynonymous	G201C	Q67H
		nonsynonymous	G145A	V49I
		synonymous	C144T	G48G
	SOV4g013220	nonsynonymous	A236T	H79L
		synonymous	C282T	V94V
		nonsynonymous	T622A	F208I
	SOV4g013230	nonsynonymous	C611T	S204L
		synonymous	T570C	T190T
		nonsynonymous	A563G	H188R
		frameshift deletion	542_545del	S181fs
		nonsynonymous	A529T	N177Y
		nonsynonymous	T512C	V171A
		frameshift insertion	505_506insA	L169fs
		stopgain	504_505insCTGTAA	L169delinsLX
		frameshift insertion	500_501insCTGTATTTTCTGTA	A167fs
		nonsynonymous	G424A	D142N
	SOV4g013240	nonsynonymous	T50G	I17S
		nonsynonymous	A260C	Y87S
		nonsynonymous	G374A	R125H
		nonsynonymous	C570A	F190L
		frameshift deletion	757delT	Y253fs
	SOV4g020900	nonsynonymous	G472A	V158I
		nonsynonymous	A17G	Q6R
	SOV4g020910	nonsynonymous	G349A	E117K
	SOV4g020920	synonymous	C15T	F5F
		nonsynonymous	A224C	H75P
Chlorophyll B	SOV1g020220	nonsynonymous	A224T	E75V
		nonsynonymous	G242A	G81D
		nonsynonymous	G262A	E88K
		nonsynonymous	C554A	A185D
	SOV4g004970	frameshift deletion	221_246del	R74fs
	SOV4g004980	nonframeshift deletion	334_339del	112_113del
		frameshift insertion	328_329insA	A110fs
		nonsynonymous	G328A	A110T
		synonymous	G318C	V106V
		frameshift insertion	305_306insAA	G102fs
		frameshift deletion	303_304del	F101fs
		nonsynonymous	G293C	C98S
		nonsynonymous	T290G	V97G
		synonymous	C285T	L95L
		synonymous	C279T	N93N
		nonsynonymous	A266G	D89G
		nonsynonymous	A263G	N88S
		synonymous	T192A	S64S
		synonymous	A180G	P60P
		synonymous	C141T	N47N
		nonsynonymous	T135G	I45M
		synonymous	A126G	T42T
		synonymous	T123A	T41T
		synonymous	A120T	L40L
		nonsynonymous	T100G	F34V
		nonsynonymous	A87C	E29D
		synonymous	T84C	G28G
		nonsynonymous	G70A	A24T
		synonymous	A42G	V14V
		nonsynonymous	C35A	A12D
		synonymous	T27C	I9I
		frameshift deletion	15_16del	N5fs
		frameshift insertion	12_13insGG	N5fs
	SOV4g004990	nonsynonymous	T1209G	H403Q
		synonymous	G1164A	R388R
		frameshift deletion	910delT	C304fs
		synonymous	C762T	H254H
		nonsynonymous	G405T	K135N
		synonymous	G396A	P132P
	SOV4g005000	synonymous	G318C	G106G
	SOV4g005010	synonymous	G507C	A169A
		synonymous	A492G	T164T
		nonsynonymous	G411C	W137C
		nonsynonymous	T241A	S81T
		nonsynonymous	A112G	T38A
		nonsynonymous	G96T	Q32H
	SOV4g005020	frameshift deletion	724_728del	G242fs
		nonsynonymous	G722C	C241S
		nonsynonymous	C503A	A168E
	SOV4g005030	nonsynonymous	G920A	R307K
		nonframeshift insertion	240_241insGGTTCA	S81delinsGSS
		nonsynonymous	T7G	C3G
	SOV4g005040	nonsynonymous	A825T	K275N
		synonymous	T822C	Y274Y
		nonsynonymous	T818C	L273S
		nonsynonymous	G796A	V266I
		nonsynonymous	C772A	L258I
		synonymous	T735G	V245V
		synonymous	A732G	T244T
		nonsynonymous	C731A	T244K
		synonymous	A729G	V243V
		synonymous	A726G	G242G
		synonymous	G723T	V241V
		frameshift insertion	718_719insTTTGG	K240fs
		frameshift deletion	712_716del	Y238fs
		synonymous	G705A	K235K
		nonsynonymous	C702G	F234L
		nonsynonymous	T700G	F234V
		frameshift insertion	697_698insCTTT	R233fs
		nonsynonymous	G694C	D232H
		frameshift deletion	685_691del	E229fs
		synonymous	C660T	C220C
		nonsynonymous	T653A	M218K
		nonsynonymous	G640C	V214L
		synonymous	C639T	F213F
		nonsynonymous	G633T	E211D
		synonymous	A621T	P207P
		nonframeshift insertion	618_619insTATAAAGCT	P207delinsYKAP
		frameshift insertion	611_612insAC	F204fs
		synonymous	A609C	V203V
		frameshift deletion	607delG	V203fs
		nonsynonymous	A604C	K202Q
		nonsynonymous	T602A	V201D
		frameshift deletion	596_599del	S199fs
		nonframeshift insertion	592_593insCCG	D198delinsAD
		synonymous	C589T	L197L
		synonymous	C579T	L193L
		synonymous	C570T	R190R
		synonymous	T561C	C187C
		nonsynonymous	A553G	I185V
		synonymous	C550T	L184L
		synonymous	G483A	G161G
		synonymous	T477C	V159V
		synonymous	G474A	K158K
		nonsynonymous	A451T	T151S
		frameshift deletion	444_447del	E148fs
		nonsynonymous	A439G	T147A
		synonymous	T414C	N138N
		nonsynonymous	A413C	N138T
		nonsynonymous	A409G	N137D
		frameshift deletion	399_400del	T133fs
		nonsynonymous	C398A	T133N
		frameshift insertion	395_396insCA	T132fs
		synonymous	G390A	Q130Q
		nonsynonymous	C388A	Q130K
		synonymous	C360A	G120G
		nonsynonymous	G340A	E114K
		synonymous	A306G	P102P
		synonymous	T261C	L87L
		synonymous	C240T	N80N
		synonymous	C234A	T78T
		nonsynonymous	A232G	T78A
		nonsynonymous	G223A	V75M
		synonymous	T208C	L70L
		nonsynonymous	C181G	Q61E
		nonsynonymous	C176G	T59R
		nonframeshift insertion	170_171insTAG	S57delinsSR
		stopgain	C170A	S57X
		frameshift deletion	166_167del	S56fs
		stopgain	G163T	G55X
		frameshift deletion	160delA	T54fs
		synonymous	G153C	G51G
		nonsynonymous	G152A	G51E
		nonsynonymous	G151T	G51W
		frameshift deletion	140_141del	M47fs
		nonframeshift insertion	138_139insCGT	M47delinsRM
		frameshift insertion	135_136insGT	I46fs
		frameshift insertion	129_130insTTGAA	V44fs
		synonymous	A126G	R42R
		nonsynonymous	G112T	D38Y
		nonsynonymous	C107A	T36K
		nonsynonymous	A106G	T36A
		nonsynonymous	G75T	K25N
		nonsynonymous	A74T	K25M
		stopgain	A73T	K25X
		nonsynonymous	C59G	A20G
		synonymous	T48C	I16I
		nonsynonymous	A43C	M15L
		nonsynonymous	A37G	N13D
		nonsynonymous	G30A	M10I
		nonsynonymous	C25A	Q9K
		nonsynonymous	A20C	E7A
		synonymous	T18A	G6G
		nonsynonymous	G17C	G6A
		nonsynonymous	T8C	I3T
	SOV4g020900	nonsynonymous	G472A	V158I
		nonsynonymous	A17G	Q6R
	SOV4g020910	nonsynonymous	G349A	E117K
	SOV4g020920	synonymous	C15T	F5F
		nonsynonymous	A224C	H75P
Oxalate	SOV1g009810	nonsynonymous	T109A	C37S
	SOV1g009820	nonsynonymous	G754A	G252S
		synonymous	A753G	S251S
		nonsynonymous	T751C	S251P
		synonymous	T741C	Y247Y
		frameshift insertion	730_731insA	P244fs
		nonframeshift deletion	698_727del	233_243del
		nonsynonymous	A680G	Y227C
		nonsynonymous	C671T	P224L
		nonsynonymous	G664T	V222L
		frameshift insertion	662_663insAT	I221fs
		stopgain	C643T	R215X
		nonsynonymous	C641G	A214G
		nonsynonymous	A625G	I209V
		nonsynonymous	T622C	Y208H
		nonsynonymous	G620A	S207N
		synonymous	C612T	N204N
		nonsynonymous	A602G	N201S
		nonsynonymous	A601G	N201D
	SOV1g009840	synonymous	C174G	R58R
	SOV1g034140	synonymous	A1131C	I377I
		synonymous	C1167T	V389V
	SOV2g019330	nonsynonymous	C64T	L22F
		synonymous	C69A	S23S
		nonsynonymous	A91G	R31G
		nonsynonymous	G94A	A32T
		nonsynonymous	C112A	Q38K
		nonsynonymous	A143T	H48L
		nonsynonymous	G231T	K77N
		synonymous	T267C	G89G
		nonsynonymous	C526G	Q176E
	SOV2g019340	synonymous	T144C	N48N
		synonymous	A114G	Q38Q
		synonymous	G90A	Q30Q
		nonsynonymous	T20G	M7R
	SOV2g019350	synonymous	G633A	L211L
		synonymous	G474A	A158A
		synonymous	C264T	S88S
	SOV2g019360	nonsynonymous	C1276T	P426S
		synonymous	C384T	F128F
		nonsynonymous	C208T	P70S
	SOV2g019370	nonsynonymous	G95A	R32K
		nonsynonymous	C197T	S66L
		nonsynonymous	T401A	I134N
		nonsynonymous	G446A	C149Y
		nonsynonymous	T473G	L158R
		nonsynonymous	G529A	E177K
		nonsynonymous	G542T	C181F
	SOV3g021990	nonsynonymous	T82C	F28L
		synonymous	C459A	R153R
Nitrate	SOV1g012470	nonsynonymous	T770C	M257T
		nonsynonymous	C863T	A288V
	SOV1g012480	nonsynonymous	G128T	R43L
	SOV1g012490	nonsynonymous	C144G	H48Q
		frameshift insertion	31_32insGTAC	L11fs
	SOV1g012550	synonymous	C318T	P106P
		nonsynonymous	G370A	E124K
		frameshift deletion	393delG	K131fs
		synonymous	G441A	S147S
		nonsynonymous	A446T	D149V
		nonsynonymous	G457A	A153T
		frameshift insertion	510dupT	H170fs
	SOV1g012560	nonsynonymous	A4283G	E1428G
		nonframeshift deletion	3910_3939del	1304_1313del
		synonymous	C3660A	I1220I
		nonsynonymous	T2967G	H989Q
		nonsynonymous	C2368T	R790C
		synonymous	T1098C	F366F
		nonsynonymous	C561A	D187E
	SOV1g012570	synonymous	T36C	F12F
		synonymous	T4458C	N1486N
	SOV1g012600	synonymous	G744A	Q248Q
		synonymous	A873G	Q291Q
	SOV1g012610	nonsynonymous	G647A	G216D
		nonsynonymous	T568C	W190R
		nonsynonymous	C26A	A9E
	SOV1g012620	synonymous	A1407C	S469S
	SOV1g012660	nonsynonymous	A248G	Y83C
	SOV1g012690	synonymous	C168T	D56D
	SOV1g012700	nonsynonymous	T695C	F232S
		nonsynonymous	G1016A	G339E
		synonymous	T1947C	A649A
	SOV1g020330	nonsynonymous	C71T	A24V
	SOV2g014620	nonsynonymous	A40G	I14V
		synonymous	T180C	T60T
		nonsynonymous	A190C	N64H
		nonsynonymous	C265T	P89S
		nonsynonymous	G335T	R112M
	SOV2g014630	nonsynonymous	A496T	I166F
		frameshift insertion	442_443insG	N148fs
		nonsynonymous	A442T	N148Y
		synonymous	G246C	A82A
		frameshift insertion	215_216insGTAC	T72fs
		synonymous	T201C	S67S
		nonsynonymous	C200G	S67C
		nonsynonymous	C187A	H63N
Soluble Sugar	SOV2g035070	synonymous	T891C	I297I
		frameshift insertion	688dupA	T230fs
		nonsynonymous	C599T	T200I
		nonsynonymous	G481A	G161S
	SOV2g035090	nonsynonymous	C286T	R96C
		nonsynonymous	A125G	Y42C
	SOV2g035100	synonymous	C873T	F291F
	SOV2g035110	nonsynonymous	G717T	E239D
		nonsynonymous	C901T	P301S
		nonframeshift insertion	944_945insGGGTTC	R315delinsRGS
	SOV2g035120	nonsynonymous	T106A	S36T
	SOV2g035130	nonsynonymous	T1889G	I630S
	SOV2g035140	nonsynonymous	G271A	A91T
Mn	SOV4g019330	synonymous	A282G	Q94Q
	SOV5g022250	nonframeshift deletion	242_244del	81_82del
		synonymous	C765T	N255N
		nonsynonymous	C773A	P258Q
		synonymous	C816G	L272L
		synonymous	A825G	S275S
		synonymous	T1156C	L386L
		nonsynonymous	T1223G	I408S
		synonymous	C1248T	V416V
		synonymous	T1284A	S428S
		synonymous	T1380C	C460C
		nonsynonymous	C1484A	T495N
	SOV5g022630	nonsynonymous	C529T	R177C
		nonsynonymous	A1226G	E409G
		nonsynonymous	G1327A	A443T
		frameshift insertion	1335_1336insAAAGC	V445fs
		frameshift deletion	1338_1339del	R446fs
	SOV5g022640	synonymous	A1197G	V399V
		synonymous	G474A	L158L
		nonsynonymous	T314C	I105T
Cu	SOV2g032680	synonymous	T168C	G56G
	SOV2g032700	synonymous	T972C	G324G
		synonymous	A693T	R231R
		nonsynonymous	C428G	T143S
		nonsynonymous	T211G	S71A
	SOV2g032710	nonsynonymous	A29T	N10I
		nonsynonymous	G295A	G99S
		nonsynonymous	C881A	T294K
		nonsynonymous	G1189A	G397R
		nonsynonymous	G1210A	V404I
		nonsynonymous	G1292A	R431K
		synonymous	C1479A	G493G
		nonsynonymous	A1504G	I502V
		synonymous	C1539T	N513N
		synonymous	T1542G	V514V
		synonymous	C1557T	A519A
		synonymous	A1575G	S525S
		synonymous	C1576A	R526R
		nonsynonymous	A1613G	N538S
		synonymous	T1644C	N548N
		synonymous	T1734C	N578N
		synonymous	A1785C	I595I
		nonsynonymous	C1788G	N596K
		synonymous	T1798C	L600L
		synonymous	G1800A	L600L
		synonymous	C1809T	A603A
		nonsynonymous	C1811T	S604F
		nonsynonymous	A1813G	M605V
		nonsynonymous	T1814A	M605K
		synonymous	T1821C	F607F
		nonsynonymous	G1827T	W609C
		synonymous	C1860T	C620C
		synonymous	T1872A	G624G
		nonsynonymous	A1909C	I637L
		synonymous	T1911C	I637I
		nonsynonymous	G1927A	E643K
		synonymous	T1944G	P648P
		synonymous	T1965C	A655A
		synonymous	A1992G	G664G
		synonymous	G2070A	S690S
		nonsynonymous	C2386G	R796G
		nonsynonymous	G2599A	D867N
		synonymous	T2604G	G868G
		nonsynonymous	A2605T	I869F
		nonsynonymous	T2607G	I869M
		synonymous	T2640C	C880C
		synonymous	T2676G	V892V
		nonsynonymous	G2750A	S917N
	SOV3g018830	nonsynonymous	G7646A	R2549Q
		nonsynonymous	A6625G	T2209A
		nonsynonymous	G5232C	K1744N
		nonsynonymous	G4123A	E1375K
		nonsynonymous	C3115T	R1039C
		synonymous	T2115A	L705L
		nonsynonymous	A1696G	N566D
		nonsynonymous	C589G	H197D
	SOV3g018840	synonymous	A1134G	A378A
		nonsynonymous	C419T	A140V
		nonsynonymous	C259A	H87N
		nonsynonymous	T230C	I77T
		synonymous	G105A	T35T
		nonsynonymous	T56G	V19G
	SOV3g018850	synonymous	C633T	D211D
	SOV3g041260	nonsynonymous	C104A	A35E
Fe	SOV1g008470	synonymous	C91T	L31L
		nonsynonymous	T431A	V144D
		nonsynonymous	A644T	K215M
		synonymous	T1557A	G519G
		frameshift deletion	2130delC	D710fs
		stoploss	A2169G	X723W
	SOV1g008480	nonsynonymous	A148G	N50D
